# Supplementary material for: Iron/photoredox dual catalysis for acyl nitrene-based C–O bond formation towards phthalides
Source: Royal Society of Chemistry journal article supplement (doi:10.1039/d2cc04917a), 2022-01-01

# Supporting Information

## Iron/Photoredox Dual Catalysis for Acyl Nitrene-Based C-O Bond Formation towards Phthalides

Zhide Zhang,<sup>a,b</sup> Yangling Deng,<sup>b</sup> Ming Hou,<sup>b</sup> Xiaojing Lai,<sup>b</sup> Meng Guan,<sup>b</sup> Fengzhi Zhang,<sup>\*,a,c</sup> Rui Qi,<sup>b</sup> and  
Guanyinsheng Qiu<sup>\*,b</sup>

<sup>a</sup> College of Pharmaceutical Sciences, ZheJiang University of Technology, Hangzhou 341014,  
ZheJiang, China

<sup>b</sup> College of Biological, Chemical Sciences and Engineering, Jiaying University, Jiaying 314001,  
ZheJiang, China

<sup>c</sup> School of Pharmaceutical Sciences, Hangzhou Medical College, Hangzhou 310007, Zhejiang, China

|                                                                             |    |
|-----------------------------------------------------------------------------|----|
| 1.General information .....                                                 | 2  |
| 2.Procedure for the preparation of starting materials .....                 | 5  |
| 3.Experimental procedures.....                                              | 7  |
| 4.Mechanistic Studies .....                                                 | 9  |
| 5.Characterization for all compounds .....                                  | 10 |
| 6.References.....                                                           | 25 |
| 7.Copies of <sup>1</sup> H and <sup>13</sup> C NMR spectra of products..... | 26 |
| 8.X-ray crystal structures for Product 3v .....                             | 63 |

## 1. General information

Unless otherwise noted, all of the reagents were purchased from commercial suppliers and used without purification. All commercially available compounds were purchased from Energy Chemical, Bidepharm or Adamas. TLC was carried out on SiO<sub>2</sub> (silica gel 60 F254, Merck), and the spots were located with UV light (254 nm). Flash chromatography was carried out on SiO<sub>2</sub> (silica gel 60, 200-300 mesh). NMR spectra were measured on a Bruker magnetic resonance spectrometer (<sup>1</sup>H at 400 MHz, <sup>13</sup>C at 100 MHz). Chemical shifts are reported in ppm using tetramethylsilane as internal standard (s = singlet, d = doublet, t = triplet, q = quartet, dd = doublet of doublets, m = multiplet). CDCl<sub>3</sub> and TMS were used as a solvent and an internal standard, respectively. MS data were obtained on an Agilent 5975C inert 350 EI mass spectrometer (GC-MS); IR spectra were recorded on a NEXUS FT-IR spectrometer. HRMS data were obtained on a VG ZAB-HS mass spectrometer, Bruker Apex IV FTMS spectrometer. Absorption spectra were obtained on a HITACHI U-2910 spectrometer. X-Ray single-crystal diffraction data were collected on an Agilent Technologies Gemini single-crystal diffractometer.

For light-promoted reactions, we use RLH-18 8-position Photo Reaction System, which manufactured by Beijing Rogertech Co. Ltd base in Beijing PRC. This Photo reactor we used have equipped 8 blue light 10W LED, other LEDs could be selected and replaced each position. This blue light 10W LED's energy peak wavelength is 453.6 nm, peak width at half-height is 20.4 nm, Irradiance@5W is 246 mW/cm<sup>2</sup>. Irradiation vessel is general schlenk tube, LED irradiate through a high-reflection channel to the test tube, path length is 2 cm. no filter between LED and test tube. And the temperature of the heated reactor was set to indicate temperature.

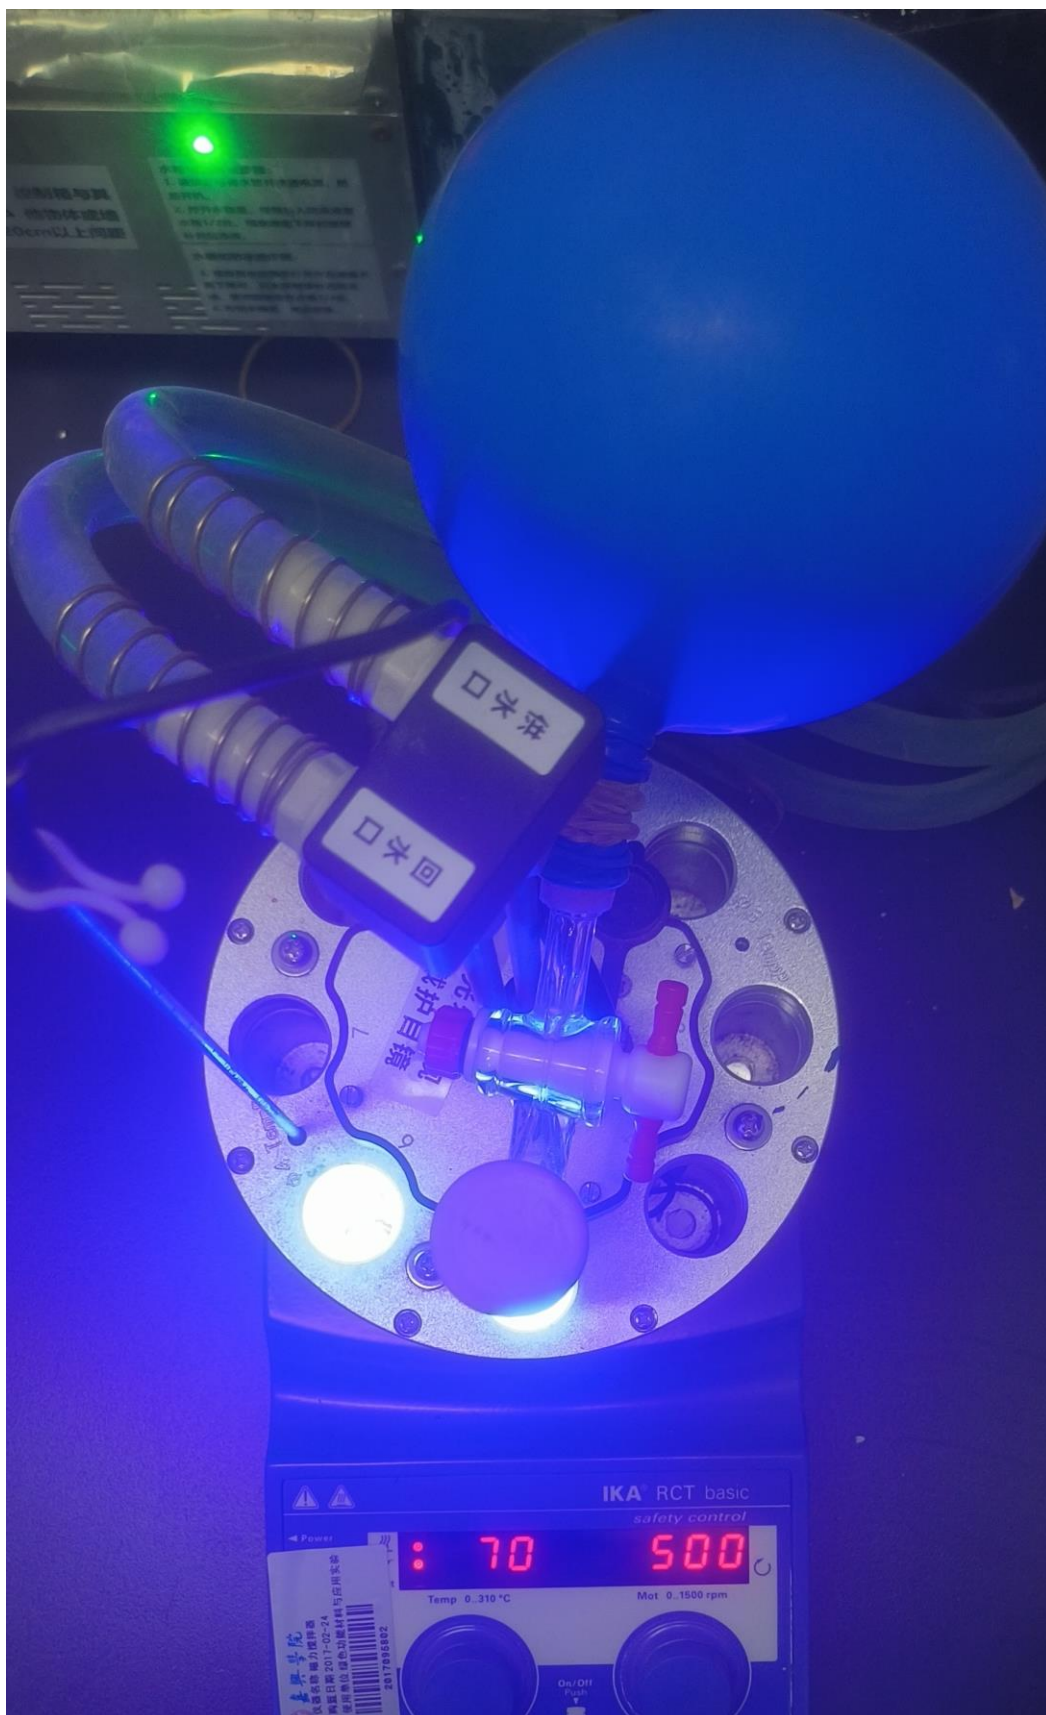

Figure S1. Setup for photocatalytic reactions

## LED Test Report

**Product Mark**

Model: 1-455 nm (452.6)@5W  
 Temperature: 23°C  
 Tester: WU

Manufacture: Beijing Rogertech Co.Ltd  
 Humidity: 20%  
 Test Date: 2021-04-12,14:54:09

**Parameter**

| Name         | value                     | Name                    | Value         | Name             | Value       | Name | Value |
|--------------|---------------------------|-------------------------|---------------|------------------|-------------|------|-------|
| URH          | mW/cm <sup>2</sup> 0.0000 | CIE u,v                 | 0.1965,0.0556 | CIE1931 Y        | 159560.406  |      |       |
| UVC          | mW/cm <sup>2</sup> 0.0000 | CIE u',v'               | 0.1965,0.0833 | CIE1931 Z        | 4664709.500 |      |       |
| UVB          | mW/cm <sup>2</sup> 0.0000 | SDCM                    | 100.00        | TLCI-2012        | 0           |      |       |
| UVA          | mW/cm <sup>2</sup> 0.0000 | Ra                      | -70.1         | Integral (ms)    | 0.1         |      |       |
| Euv          | mW/cm <sup>2</sup> 0.00   | Ee(mW/cm <sup>2</sup> ) | 289.80399     | Peak Signal      | 63321       |      |       |
| Eb           | mW/cm <sup>2</sup> 289.13 | S/P                     | 22.956        | Dark Signal      | 3504        |      |       |
| Eg           | mW/cm <sup>2</sup> 0.79   | Dominant (nm)           | 457.40        | Compensate level | 2892        |      |       |
| Er           | mW/cm <sup>2</sup> 0.00   | Purity (%)              | 99.2          |                  |             |      |       |
| Eir          | mW/cm <sup>2</sup> 0.00   | HalfWidth(nm)           | 19.8          |                  |             |      |       |
| E(λ)         | 108979.77                 | Peak (nm)               | 452.6         |                  |             |      |       |
| Candle E(fc) | 10124.47                  | Center (nm)             | 453.3         |                  |             |      |       |
| CCT (K)      | 100000                    | Centroid (nm)           | 455.0         |                  |             |      |       |
| Duv          | -0.06750                  | Color Ration (RGB)      | 0,0,5,94,5    |                  |             |      |       |
| CIE x,y      | 0.1493,0.0281             | CIE1931 X               | 846566.125    |                  |             |      |       |

**Spectrogram**

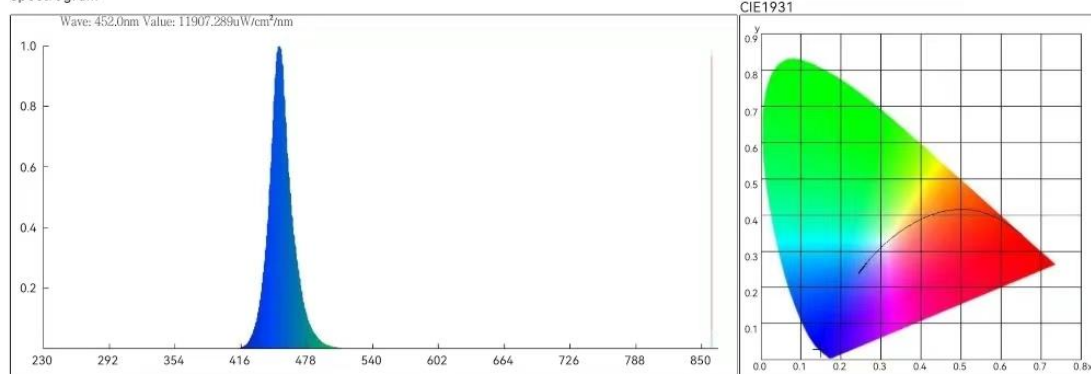

**CRI**

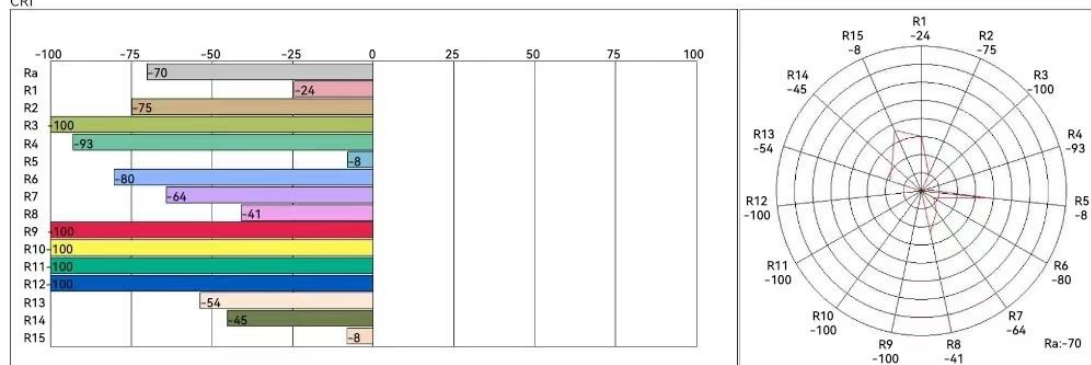

**Instrument Status**

Type: OHSP-350UV  
 Integral Time: 0.050ms

SN: 0  
 Peak Signal: 63321

Scan Range: 230-850nm  
 VDark: 3504

Remark: Test in 5W

Figure 2. Spectrophotometer analysis report

## 2.Procedure for the preparation of starting materials

(a) General procedure for the synthesis of Various types of benzoic acid

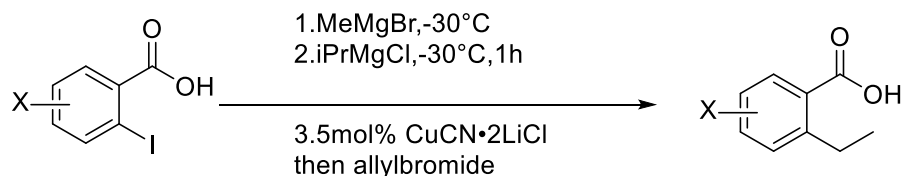

2-Ethylbenzoic acid was prepared by a slightly modified procedure from known literature <sup>[1]</sup>. To a stirred solution of 2-iodobenzoic acid in THF (0.33M) at -30 °C was slowly added MeMgBr (1.0 equiv.), then iPrMgCl (1.2 equiv.) The reaction was stirred at -30 °C for 1 h or until by GC/MS (aliquots were quenched with water prior to analysis) then the reaction was cooled to -40 °C and CuCN·2LiCl in THF (5 mol%, 0.34M,) was added slowly and stirred for about 10 minutes while warming to -30 °C. Iodoethane (3 equiv) was added Once and allow the reaction to warm to ambient temperature overnight. The reaction was diluted with EtOAc, quenched with NH<sub>4</sub>Cl, and extracted with EtOAc (3 x 20 ml). The combined organic layers were washed with brine and dried over Na<sub>2</sub>SO<sub>4</sub>. This concentrated the organic layer and dissolved it in the corresponding alcohol (MeOH or ethanol, 0.25M). To the stirred solution was added NaOH (10 equiv, 2.5 M) and the reaction was stirred for 6 hours. The alcohol was distilled off and the crude mixture was washed with Et<sub>2</sub>O. The aqueous layer was acidified with 1M HCl to pH =3 and extract with CH<sub>2</sub>Cl<sub>2</sub>. Wash the combined CH<sub>2</sub>Cl<sub>2</sub> layers Dry with brine and Na<sub>2</sub>SO<sub>4</sub>. The crude mixture was concentrated and purified by the following methods Silica gel column chromatography gave 2-Ethylbenzoic acid. The residue was purified by column chromatography on silica gel (PE/EA = 5:1) to give the desired products.

(b) General procedure for the synthesis of *N*-methoxybenzamide

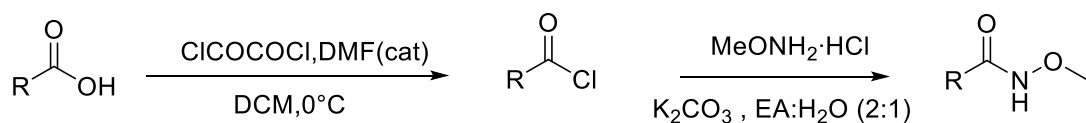

A dried round-bottom flask was charged with acid (4.5 mmol), DCM (15 mL),

and 2 drops of DMF. Then, oxalyl chloride (0.60 mL, 0.876 g, 6.9 mmol) was added dropwise within 5 min at 0 °C. The resulting mixture was stirred at room temperature for 3.5 h and concentrated under reduced pressure. The residues was dissolved in EtOAc (40 mL) and K<sub>2</sub>CO<sub>3</sub> (1.24 g, 9.0 mmol), MeONH<sub>2</sub> HCl (458 mg, 5.4 mmol), water (20 mL) were added sequentially. The resulting mixture was stirred for 20 h at room temperature and extracted with EtOAc (50 mL). The organic layer was washed with saturated aqueous NaHCO<sub>3</sub> (15 mL × 2), brine (15 mL × 2), and dried over anhydrous Na<sub>2</sub>SO<sub>4</sub>, filtered and concentrated under reduced pressure. The crude product was recrystallized (EtOAc) to afford the product. In the case of an oil, The residue was purified by column chromatography on silica gel (PE/EA = 5:1 - 1:1) <sup>[2]</sup>.

(c) General procedure for the synthesis of N-methoxy-2-(methyl-d<sub>3</sub>) benzamide

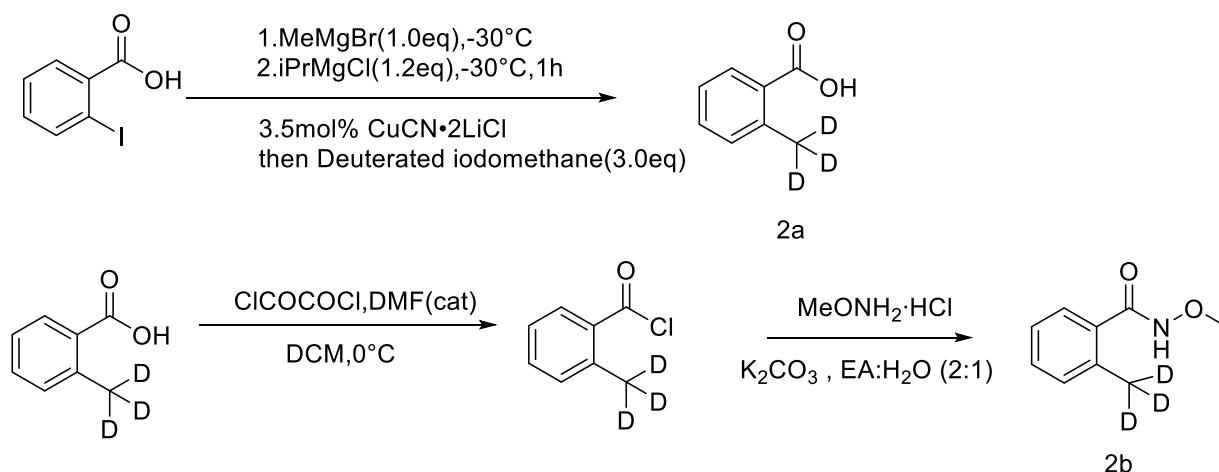

**2a** was prepared by a slightly modified procedure from known literature <sup>[1]</sup>. **2a** is the product that has been reported <sup>[5]</sup>

### 3.Experimental procedures

#### Procedure A:

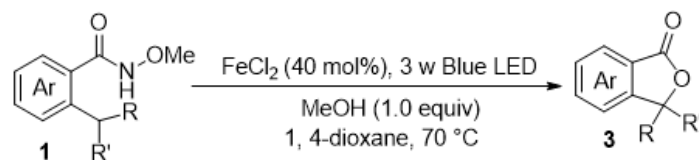

To a test tube was added *N*-methoxyamide **1** (0.3 mmol, 1.0 equiv.), FeCl<sub>2</sub> (0.12 mmol, 0.4 equiv.) followed by 1,4-dioxane (2 mL) in the mixture. Additional MeOH (1 eq) was added and the mixture was stirred for 3 w at 70 °C under blue light until the substrate was completely consumed and the resulting mixture was cooled to room temperature. Extract the mixture with EA (2 mL x 3). The combined organic layers were dried over anhydrous Na<sub>2</sub>SO<sub>4</sub>. The solvent was removed in vacuo and the residue was purified by silica gel chromatography using a mixture of petroleum ether/ethyl acetate on silica gel (PE/EA = 5:1-3:1) to give the desired product **3**.

#### Procedure B:

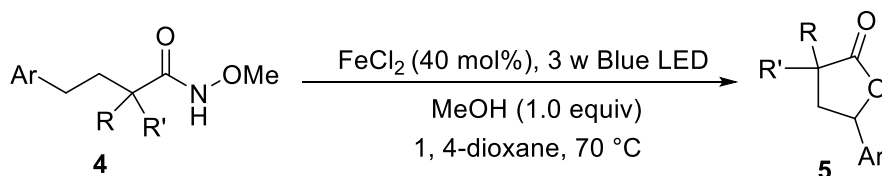

To a test tube was added *N*-methoxyamide **4** (0.3 mmol, 1.0 equiv.), FeCl<sub>2</sub> (0.12 mmol, 0.4 equiv.) followed by 1,4-dioxane (2 mL) in the mixture. Additional MeOH (1 eq) was added and the mixture was stirred for 3 w at 70 °C under blue light until the substrate was completely consumed and the resulting mixture was cooled to room temperature. Extract the mixture with EA (2 mL x 3). The combined organic layer was dried with anhydrous Na<sub>2</sub>SO<sub>4</sub>. The solvent was removed under vacuum and the residue was purified by silica gel chromatography, using a mixture of petroleum ether /ethyl acetate to give the desired product **5**<sup>[4]</sup>.

#### Procedure C:

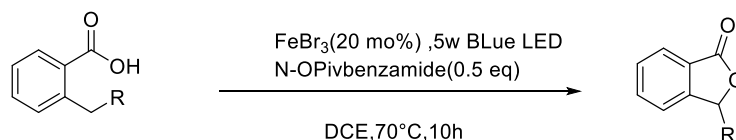

To the test tube was added 2-ethylbenzoic acid (0.4 mmol, 1.0 equiv.),  $\text{FeBr}_3$  (0.08 mmol, 0.2 equiv.), N-(pivaloyloxy benzamide (0.2 mmol, 0.5 equiv), and then 1,2-Dichloroethane (3 mL) was added to the mixture. The mixture was then stirred under blue light at  $70^\circ\text{C}$  for 5w until the substrate was completely consumed, and the resulting mixture was cooled to room temperature. Extract the mixture with EA (2 mL x 3). The combined organic layers were dried over anhydrous  $\text{Na}_2\text{SO}_4$ . The solvent was removed in vacuo and the residue was purified by silica gel chromatography using a petroleum ether/ethyl acetate mixture to give the desired product.

**Procedure D:**

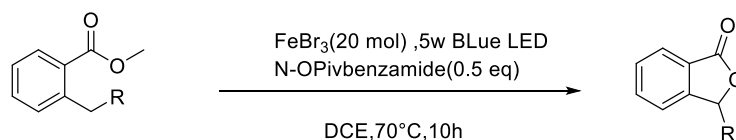

To the test tube was added 2-ethylbenzoic ester (0.4 mmol, 1.0 equiv.),  $\text{FeBr}_3$  (0.08 mmol, 0.2 equiv.), N-(pivaloyloxy benzamide (0.2 mmol, 0.5 equiv), and then 1,2-Dichloroethane (3 mL) was added to the mixture. The mixture was then stirred under blue light at  $70^\circ\text{C}$  for 5w until the substrate was completely consumed, and the resulting mixture was cooled to room temperature. Extract the mixture with EA (2 mL x 3). The combined organic layers were dried over anhydrous  $\text{Na}_2\text{SO}_4$ . The solvent was removed in vacuo and the residue was purified by silica gel chromatography using a petroleum ether/ethyl acetate mixture to give the desired product.



## 4. Mechanistic Studies

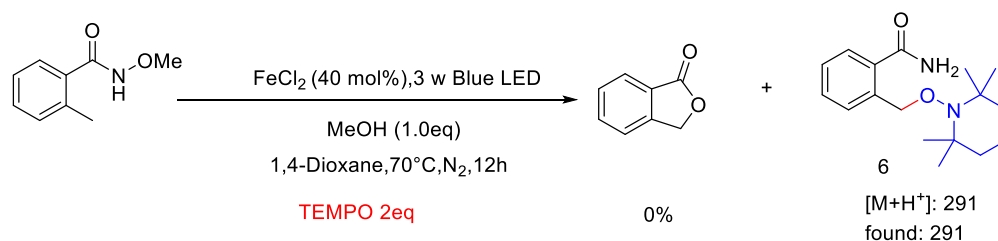

Under  $\text{N}_2$  atmosphere, to a test tube were added N-Methoxyamide **1** (0.3 mmol, 1.0 equiv.),  $\text{FeCl}_2$  (0.12 mmol, 0.4 equiv.), TEMPO (93.8 mg, 0.6 mmol, 2.0 equiv.) and then 1,4-Dioxane (3 mL) was added to the mixture. The mixture was then stirred at  $70^\circ\text{C}$  blue light for 3 w, The reaction mixture was irradiated under nitrogen atmosphere for 12 hours, and the resulting mixture was cooled to room temperature. The reaction was completely suppressed. The radical trapping product **6** could be observed by HR-MS (positive mode ESI).

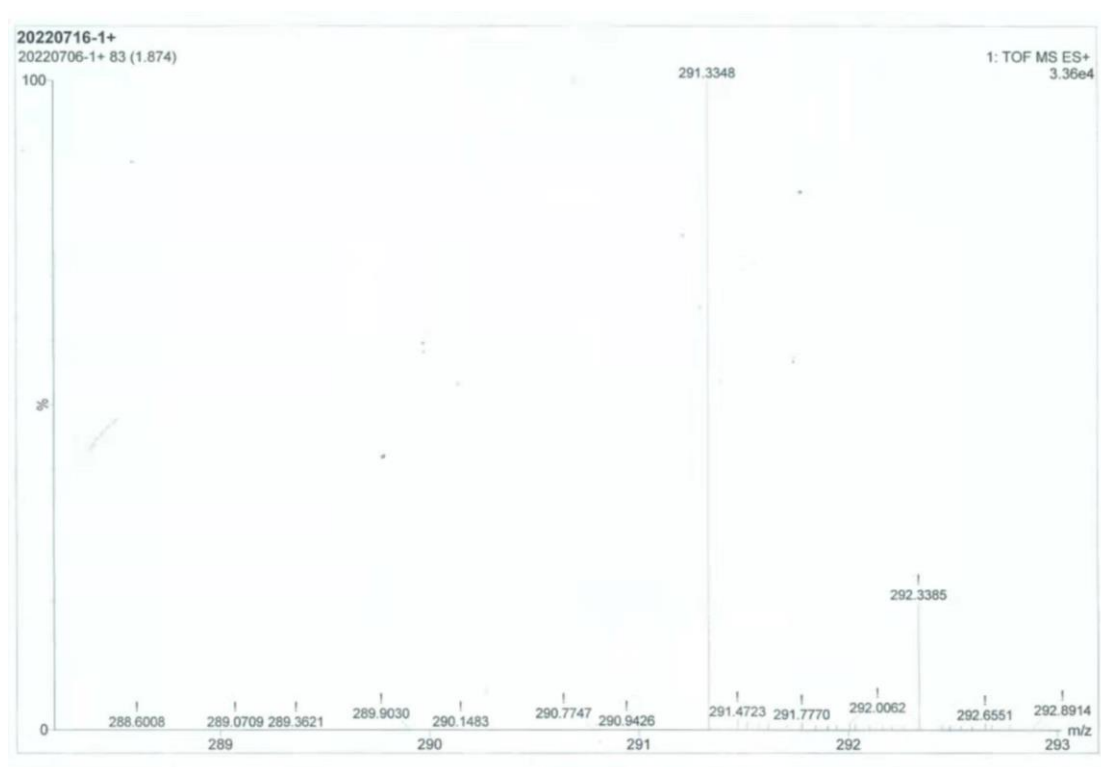

## 5.Characterization for all compounds

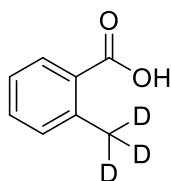

**(methyl-d3)benzoic acid (2a):** The title compound was prepared according to General procedure for the synthesis of Various types of benzoic acid<sup>[5]</sup>. White solid. <sup>1</sup>H NMR (400 MHz, CDCl<sub>3</sub>) δ 8.11 – 8.05 (m, 1H), 7.49 – 7.42 (m, 1H), 7.32 – 7.25 (m, 2H). <sup>13</sup>C{<sup>1</sup>H}NMR (100 MHz, CDCl<sub>3</sub>) δ 173.4, 141.3, 133.0, 131.9, 131.6, 128.3, 125.9. IR (cm<sup>-1</sup>): 2648, 1678 1384, 1287, 725.

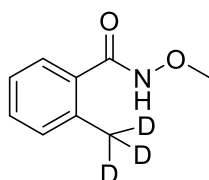

**N-methoxy-2-(methyl-d3)benzamide (2b):** The title compound was prepared according to the synthesis of N-methoxy-2-(methyl-d3) benzamide, White solid. <sup>1</sup>H NMR (400 MHz, CDCl<sub>3</sub>) δ 9.45 (s, 1H), 7.28 – 7.18 (m, 2H), 7.15 – 7.04 (m, 2H), 3.72 (s, 3H); <sup>13</sup>C{<sup>1</sup>H}NMR (100 MHz, CDCl<sub>3</sub>) δ 167.9, 136.6, 132.6, 130.9, 130.4, 127.2, 125.5, 64.2. IR (cm<sup>-1</sup>): 3135, 2937, 1636, 1534, 1438, 1314, 1160, 1052.

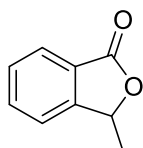

**3-methylisobenzofuran-1(3H)-one (3a)<sup>[2]</sup>:** The title compound was prepared according to the general procedure A, Colorless oil (35.5 mg, 80% yield). <sup>1</sup>H NMR (400 MHz, CDCl<sub>3</sub>) δ 7.77 – 7.75 (m, 1H), 7.62 – 7.58 (m, 1H), 7.45 – 7.38 (m, 2H), 5.49 (q, *J* = 6.3 Hz, 1H), 1.54 (d, *J* = 6.7 Hz, 3H); <sup>13</sup>C{<sup>1</sup>H}NMR (100 MHz, CDCl<sub>3</sub>) δ 170.5, 151.2, 134.1, 129.0, 125.5, 125.4, 121.7, 77.8, 20.3; IR (cm<sup>-1</sup>): 3063, 2982

1760, 1467, 1347, 1287, 1045, 763; HRMS (ESI-TOF): ( $[M+H]^+$ ) calcd for  $C_{10}H_{11}O_2^+$ : 149.0603, found: 149.0609

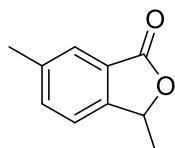

**3, 6-dimethylisobenzofuran-1(3H)-one (3b)**<sup>[2]</sup>: The title compound was prepared according to the general procedure A. Colorless oil (34.2 mg, 70% yield).  $^1H$  NMR (400 MHz,  $CDCl_3$ )  $\delta$  7.62 (s, 1H), 7.45 – 7.43 (m, 1H), 7.30 – 7.28 (m, 1H), 5.48 (q,  $J = 6.6$  Hz, 1H), 2.41 (s, 3H), 1.56 (d,  $J = 6.7$  Hz, 3H);  $^{13}C\{^1H\}$ NMR (100 MHz,  $CDCl_3$ )  $\delta$  170.6, 148.6, 139.2, 135.2, 125.9, 125.5, 121.3, 77.7, 21.2, 20.5; IR ( $cm^{-1}$ ): 2987, 2939, 1764, 1440, 1330, 1297, 1030, 943, 772; HRMS (ESI-TOF): ( $[M+H]^+$ ) calcd for  $C_{10}H_{11}O_2^+$ :163.0759, found: 163.0756

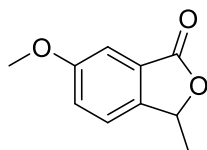

**6-methoxy-3-methylisobenzofuran-1(3H)-one (3c)**: The title compound was prepared according to the general procedure A. White solid (32.5mg, 61% yield);  $^1H$  NMR (400 MHz,  $CDCl_3$ )  $\delta$  7.30 – 7.25 (m, 2H), 7.21 – 7.19 (m, 1H), 5.49 (q,  $J = 6.6$  Hz, 1H), 3.83 (s, 3H), 1.57 (d,  $J = 6.6$  Hz, 3H);  $^{13}C\{^1H\}$ NMR (100 MHz,  $CDCl_3$ )  $\delta$  170.7, 170.5, 160.6, 143.7, 123.0, 122.4, 107.4, 77.7, 55.8, 20.5; IR ( $cm^{-1}$ ): 2985, 2918, 2839 1760, 1609, 1498, 1397, 1280, 1090, 1045; HRMS (ESI-TOF): ( $[M+H]^+$ ) calcd for  $C_{10}H_{11}O_3^+$ :179.0708; found: 179.0713

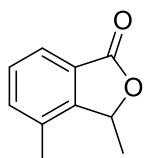

**3,4-dimethylisobenzofuran-1(3H)-one (3d)**: The title compound was prepared according to the general procedure A. Colorless oil (30.1 mg, 62% yield).  $^1H$  NMR

(400 MHz, CDCl<sub>3</sub>)  $\delta$  7.70 – 7.69 (m, 1H), 7.41 – 7.39 (m, 2H), 5.54 (q,  $J$  = 6.3, Hz, 1H), 2.38 (s, 3H), 1.62 (d,  $J$  = 6.3 Hz, 3H); <sup>13</sup>C{<sup>1</sup>H}NMR (100 MHz, CDCl<sub>3</sub>)  $\delta$  170.7, 149.4, 135.4, 132.2, 129.3, 125.7, 123.2, 77.6, 19.3, 18.0; IR (cm<sup>-1</sup>): 2986, 2933, 2868, 1770, 1623, 1492, 1387, 1310, 1269, 1061, 1050; HRMS (ESI-TOF): ([M+H]<sup>+</sup>) calcd for C<sub>10</sub>H<sub>11</sub>O<sub>2</sub><sup>+</sup>:163.0759; found: 163.0756

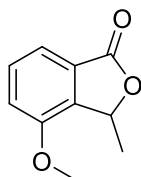

**4-methoxy-3-methylisobenzofuran-1(3H)-one (3e):** The title compound was prepared according to the general procedure A. White solid (37.4 mg, 70% yield). <sup>1</sup>H NMR (400 MHz, CDCl<sub>3</sub>)  $\delta$  7.45 – 7.40 (m, 2H), 7.08 – 7.06 (m, 2H), 5.51 (q,  $J$  = 6.4, 5.6 Hz, 1H), 3.88 (s, 3H), 1.61 (d,  $J$  = 6.5 Hz, 3H); <sup>13</sup>C{<sup>1</sup>H}NMR (100 MHz, CDCl<sub>3</sub>)  $\delta$  170.5, 154.3, 139.0, 130.9, 127.5, 117.0, 115.0, 77.0, 55.6, 19.0; IR (cm<sup>-1</sup>): 2980, 2939, 2841, 1758, 1604, 1481, 1440, 1374, 1304, 1280, 1183, 1121, 1050; HRMS (ESI-TOF): ([M+H]<sup>+</sup>) calcd for C<sub>10</sub>H<sub>11</sub>O<sub>3</sub><sup>+</sup>:178.0708; found: 178.0715.

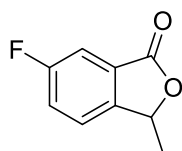

**6-fluoro-3-methylisobenzofuran-1(3H)-one (3f):** The title compound was prepared according to the general procedure A. White solid (30.8 mg, 62% yield). <sup>1</sup>H NMR (400 MHz, CDCl<sub>3</sub>)  $\delta$  7.58 – 7.49 (m, 1H), 7.45 – 7.34 (m, 2H), 5.55 (q,  $J$  = 6.6 Hz, 1H), 1.63 (d,  $J$  = 6.7 Hz, 3H); <sup>13</sup>C{<sup>1</sup>H}NMR (100 MHz, CDCl<sub>3</sub>)  $\delta$  169.2, 163.1 (d,  $J_{C-F}$  = 248.0 Hz), 146.7, 127.8, 123.3 (d,  $J_{C-F}$  = 9.0 Hz), 122.0 (d,  $J_{C-F}$  = 24.0 Hz), 112.0 (d,  $J_{C-F}$  = 24.0 Hz), 77.7, 20.4; <sup>19</sup>F NMR (376 MHz, CDCl<sub>3</sub>)  $\delta$  -111.8; IR (cm<sup>-1</sup>): 3087, 2986, 1764, 1492, 1340, 1274, 1068, 1047, 731; HRMS (ESI-TOF): ([M+Na]<sup>+</sup>) calcd for C<sub>9</sub>H<sub>8</sub>FNaO<sub>2</sub><sup>+</sup>: 189.0328; found: 189.0329.

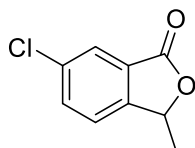

**6-chloro-3-methylisobenzofuran-1(3H)-one (3g):** The title compound was prepared according to the general procedure A. White solid (36.0 mg, 66% yield).  $^1\text{H}$  NMR (400 MHz,  $\text{CDCl}_3$ )  $\delta$  7.82 (s, 1H), 7.62 – 7.60 (m, 1H), 7.37 – 7.35 (m, 1H), 5.53 (q,  $J = 6.6$  Hz, 6.1 Hz, 1H), 1.60 (d,  $J = 5.8$  Hz, 3H);  $^{13}\text{C}\{1\text{H}\}$ NMR (100 MHz,  $\text{CDCl}_3$ )  $\delta$  168.9, 149.3, 135.4, 134.3, 127.6, 125.6, 122.9, 77.6, 20.3. IR ( $\text{cm}^{-1}$ ): 3050, 2980, 2935, 1764, 1469, 1368, 1345, 1050, 932; HRMS (ESI-TOF): ( $[\text{M}+\text{H}]^+$ ) calcd for  $\text{C}_9\text{H}_8\text{ClO}_2^+$ : 183.0213; found: 183.0218.

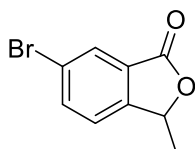

**6-bromo-3-methylisobenzofuran-1(3H)-one: (3h)<sup>[3]</sup>:** The title compound was prepared according to the general procedure A. Colorless oil (43.3 mg, 64% yield).  $^1\text{H}$  NMR (400 MHz,  $\text{CDCl}_3$ )  $\delta$  8.00 (s, 1H), 7.79 – 7.77 (m, 1H), 7.33 – 7.31 (m, 1H), 5.52 (q,  $J = 6.6$  Hz, 1H), 1.62 (d,  $J = 6.7$  Hz, 3H);  $^{13}\text{C}\{1\text{H}\}$ NMR (100 MHz,  $\text{CDCl}_3$ )  $\delta$  168.8, 149.8, 137.1, 128.6, 127.9, 123.2, 123.0, 77.7, 20.2; IR ( $\text{cm}^{-1}$ ): 3045, 2991, 2933, 1758, 1475, 1392., 1304, 1045, 920; HRMS (ESI-TOF): ( $[\text{M}+\text{H}]^+$ ) calcd for  $\text{C}_9\text{H}_8\text{BrO}_2^+$ : 226.9708; found: 226.9704.

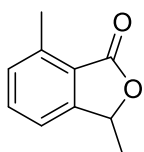

**3,7-dimethylisobenzofuran-1(3H)-one (3i)<sup>[3]</sup>:** The title compound was prepared according to the general procedure A. Colorless oil (33.9 mg, 70% yield).  $^1\text{H}$  NMR (400 MHz,  $\text{CDCl}_3$ )  $\delta$  7.54 – 7.50 (m, 1H), 7.23 – 7.21 (m, 1H), 5.48 (q,  $J = 6.4$  Hz, 1H), 2.68 (s, 3H), 1.60 (d,  $J = 6.6$  Hz, 3H);  $^{13}\text{C}\{1\text{H}\}$ NMR (100 MHz,  $\text{CDCl}_3$ )  $\delta$  170.7, 151.7, 139.7, 133.7, 130.6, 123.2, 118.8, 77.2, 20.5, 17.4. IR ( $\text{cm}^{-1}$ ): 3035, 2980, 2928, 1755, 1604, 1483, 1343, 1204, 1061 and 1035; HRMS (ESI-TOF): ( $[\text{M}+\text{H}]^+$ ) calcd

for C<sub>10</sub>H<sub>11</sub>O<sub>2</sub><sup>+</sup>: 163.0759; found: 163.0756.

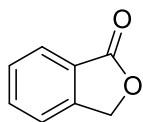

**isobenzofuran-1(3H)-one (3J)**<sup>[31]</sup>: The title compound was prepared according to the general procedure A. White solid (30.1 mg, 75% yield). <sup>1</sup>H NMR (400 MHz, CDCl<sub>3</sub>) δ 7.91 – 7.89 (m, 1H), 7.69 – 7.65 (m, 1H), 7.54 – 7.48 (m, 2H), 5.31 (s, 2H); <sup>13</sup>C{<sup>1</sup>H}NMR (100 MHz, CDCl<sub>3</sub>) δ 170.7, 146.5, 134.0, 125.7, 125.7, 122.0, 69.7; IR (cm<sup>-1</sup>): 1758, 1623, 1599, 1469, 1439, 1357, 1310, 1280, 1227, 1050, 1033, 997, 737; HRMS (ESI-TOF): ([M+H]<sup>+</sup>) calcd for C<sub>8</sub>H<sub>7</sub>O<sub>2</sub><sup>+</sup>: 135.0446; found: 135.0445.

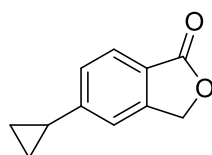

**5-cyclopropylisobenzofuran-1(3H)-one (3k)**: The title compound was prepared according to the general procedure A. White solid (33.9 mg, 65% yield). <sup>1</sup>H NMR (400 MHz, CDCl<sub>3</sub>) δ 7.76 – 7.74 (m, 1H), 7.18 – 7.16 (m, 1H), 7.11 (s, 1H), 5.23 (s, 2H), 2.03 – 1.96 (m, 1H), 1.11 – 1.08 (m, 2H), 0.80 – 0.78 (m, 2H); <sup>13</sup>C{<sup>1</sup>H}NMR (100 MHz, CDCl<sub>3</sub>) δ 171.1, 151.9, 147.1, 126.7, 125.5, 122.9, 118.6, 69.4, 16.1, 10.8. IR (cm<sup>-1</sup>): 2984, 2915, 1747, 1610, 1451, 1392, 1368, 1050, 987, 814, 772; HRMS (ESI-TOF): ([M+H]<sup>+</sup>) calcd for C<sub>11</sub>H<sub>11</sub>O<sub>2</sub><sup>+</sup>: 175.0759; found: 175.0755.

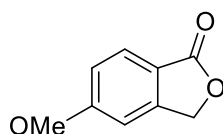

**5-methoxyisobenzofuran-1(3H)-one (3l)**: The title compound was prepared according to the general procedure A. White solid (35.9 mg, 73% yield). <sup>1</sup>H NMR (400 MHz, CDCl<sub>3</sub>) δ 7.82 – 7.80 (m, 1H), 7.04 (d, *J* = 8.2 Hz, 1H), 6.91 (s, 1H), 5.24 (s, 2H), 3.89 (s, 3H); <sup>13</sup>C{<sup>1</sup>H}NMR (100 MHz, CDCl<sub>3</sub>) δ 170.8, 164.6, 149.3, 127.2,

118.0, 116.5, 105.9, 69.1, 55.8. IR (cm<sup>-1</sup>): 2986, 1752, 1612, 1491, 1277, 1109, 1055, 988, 854, 774; HRMS (ESI-TOF): ([M+H]<sup>+</sup>) calcd for C<sub>9</sub>H<sub>9</sub>O<sub>3</sub><sup>+</sup>: 165.0552; found: 165.0546.

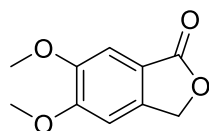

**5,6-dimethoxyisobenzofuran-1(3H)-one (3m):** The title compound was prepared according to the general procedure A. White solid (42.4 mg, 73% yield). <sup>1</sup>H NMR (400 MHz, CDCl<sub>3</sub>) δ 7.29 (s, 1H), 6.89 (s, 1H), 5.20 (s, 2H), 3.96 (s, 3H), 3.92 (s, 3H); <sup>13</sup>C{<sup>1</sup>H}NMR (100 MHz, CDCl<sub>3</sub>) δ 171.5, 154.9, 150.4, 141.0, 117.6, 106.1, 103.4, 69.1, 56.4, 56.3; IR (cm<sup>-1</sup>): 2920, 1747, 1610, 1498, 1451, 1392, 1297, 1126, 1044, 997, 866, 772; HRMS (ESI-TOF): ([M+H]<sup>+</sup>) calcd for C<sub>10</sub>H<sub>11</sub>O<sub>4</sub><sup>+</sup>: 195.0657; found: 195.0665.

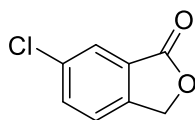

**6-chloroisobenzofuran-1(3H)-one (3n):** The title compound was prepared according to the general procedure A. White solid (33.8 mg, 67% yield). <sup>1</sup>H NMR (400 MHz, CDCl<sub>3</sub>) δ 7.84 (s, 1H), 7.72 – 7.53 (m, 1H), 7.52 – 7.35 (m, 1H), 5.29 (s, 2H); <sup>13</sup>C{<sup>1</sup>H}NMR (100 MHz, CDCl<sub>3</sub>) δ 169.6, 144.6, 135.3, 134.3, 127.5, 125.6, 123.4, 69.5; IR (KBr): 3079, 1762, 1458, 1213, 1191, 1045, 996, 872, 824, 767 cm<sup>-1</sup>; HRMS (ESI-TOF): ([M+H]<sup>+</sup>) calcd for C<sub>8</sub>H<sub>6</sub>ClO<sub>2</sub><sup>+</sup>: 169.0056; found: 169.0060.

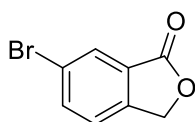

**6-bromoisobenzofuran-1(3H)-one (3o):** The title compound was prepared according to the general procedure A. White solid (38.0 mg, 60% yield). <sup>1</sup>H NMR (400 MHz,

CDCl<sub>3</sub>)  $\delta$  8.03 (s, 1H), 7.79 (d,  $J$  = 8.0 Hz, 1H), 7.38 (d,  $J$  = 8.0 Hz, 1H), 5.27 (s, 2H); <sup>13</sup>C{<sup>1</sup>H}NMR (100 MHz, CDCl<sub>3</sub>)  $\delta$  169.5, 145.1, 137.1, 128.8, 127.8, 123.7, 123.0, 69.5. IR (KBr): 3077, 1765, 1456, 1360, 1294, 1207, 1190, 1040, 993, 823, 767 cm<sup>-1</sup>; HRMS (ESI-TOF): ([M+H]<sup>+</sup>) calcd for C<sub>8</sub>H<sub>6</sub>BrO<sub>2</sub><sup>+</sup>: 212.9551; found: 212.9557.

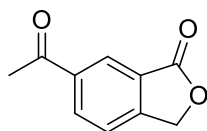

**6-acetylisobenzofuran-1(3H)-one (3p):** The title compound was prepared according to the general procedure A. White solid (32.2 mg, 61% yield). <sup>1</sup>H NMR (400 MHz, CDCl<sub>3</sub>)  $\delta$  8.43 (s, 1H), 8.31 – 8.29 (m, 1H), 7.61 – 7.59 (m, 1H), 5.38 (s, 2H), 2.66 (s, 3H); <sup>13</sup>C{<sup>1</sup>H}NMR (100 MHz, CDCl<sub>3</sub>)  $\delta$  196.4, 170.1, 150.7, 138.2, 133.6, 126.4, 126.0, 122.7, 69.7, 26.8. IR (cm<sup>-1</sup>): 3085, 1768, 1677, 1445, 1251, 1194, 1060, 988, 860, 772; HRMS (ESI-TOF): ([M+H]<sup>+</sup>) calcd for C<sub>10</sub>H<sub>9</sub>O<sub>3</sub><sup>+</sup>: 177.0552; found: 175.0544.

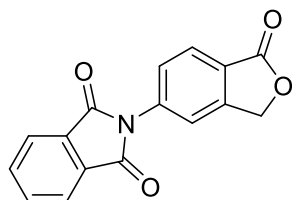

**2-(1-oxo-1,3-dihydroisobenzofuran-5-yl)isoindoline-1,3-dione (3q):** The title compound was prepared according to the general procedure A. White solid (54.9 mg, 59% yield). <sup>1</sup>H NMR (400 MHz, CDCl<sub>3</sub>)  $\delta$  8.07 – 7.94 (m, 3H), 7.84 (s, 2H), 7.73 – 7.64 (m, 2H), 5.38 (s, 2H); <sup>13</sup>C{<sup>1</sup>H}NMR (100 MHz, CDCl<sub>3</sub>)  $\delta$  170.1, 166.6, 147.3, 137.0, 134.9, 131.3, 127.0, 126.5, 124.7, 124.13 119.8, 69.4; HRMS (ESI-TOF): ([M+H]<sup>+</sup>) calcd for C<sub>14</sub>H<sub>11</sub>NO<sub>4</sub><sup>+</sup>: 280.0610; found: 280.0619.



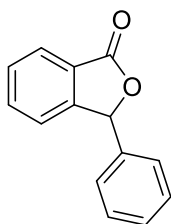

**3-phenylisobenzofuran-1(3H)-one (3r):** The title compound was prepared according to the general procedure. Yellow solid (42.8 mg, 68% yield),  $^1\text{H}$  NMR (400 MHz,  $\text{CDCl}_3$ )  $\delta$  7.99 – 7.94 (m, 1H), 7.66 – 7.62 (m, 1H), 7.58 – 7.53 (m, 1H), 7.42 – 7.23 (m, 7H), 6.40 (s, 1H);  $^{13}\text{C}\{^1\text{H}\}$ NMR (100 MHz,  $\text{CDCl}_3$ )  $\delta$  170.6, 149.7, 136.4, 134.3, 129.4, 129.3, 129.0, 127.0, 125.7, 125.56, 122.9, 82.7; IR ( $\text{cm}^{-1}$ ): 2963, 1734, 1640, 1599, 1457, 1292, 1068, 967, 725; HRMS (ESI-TOF): ( $[\text{M}+\text{H}]^+$ ) calcd for  $\text{C}_{14}\text{H}_{11}\text{O}_2^+$ : 211.0759; found: 211.0756.

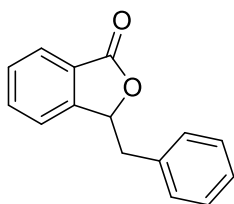

**3-benzylisobenzofuran-1(3H)-one (3s):** The title compound was prepared according to the general procedure A. White solid (50.4 mg, 75% yield).  $^1\text{H}$  NMR (400 MHz,  $\text{CDCl}_3$ )  $\delta$  7.84 – 7.82 (m, 1H), 7.63 – 7.57 (m, 1H), 7.50 – 7.46 (m, 1H), 7.30 – 7.16 (m, 6H), 5.68 (t,  $J = 6.3$  Hz, 1H), 3.27 (dd,  $J = 14.1, 6.6$  Hz, 1H), 3.15 (dd,  $J = 14.1, 6.1$  Hz, 1H);  $^{13}\text{C}\{^1\text{H}\}$ NMR (100 MHz,  $\text{CDCl}_3$ )  $\delta$  170.3, 149.1, 135.0, 133.7, 129.7, 129.2, 128.5, 127.1, 126.2, 125.7, 122.3, 81.2, 40.8; IR ( $\text{cm}^{-1}$ ): 3027, 2920, 1758, 1463, 1286, 1203, 1074, 991, 748, 701, 548; HRMS (ESI-TOF): ( $[\text{M}+\text{Na}]^+$ ) calcd for  $\text{C}_{10}\text{H}_{10}\text{NaO}_2^+$ : 247.0735; found: 247.0740.

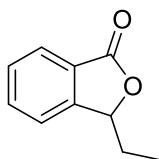

**3-ethylisobenzofuran-1(3H)-one (3t):** The title compound was prepared according to

the general procedure A. Colorless oil (36.9 mg, 76% yield).  $^1\text{H}$  NMR (400 MHz,  $\text{CDCl}_3$ )  $\delta$  7.83 – 7.0 (m, 1H), 7.62 – 7.59 (m, 1H), 7.49 – 7.43 (m, 1H), 7.41 – 7.38 (m, 1H), 5.39 (d,  $J = 4.1$  Hz, 1H), 2.15 – 1.99 (m, 1H), 1.83 – 1.68 (m, 1H), 0.99 (t,  $J = 6.8$  Hz, 3H);  $^{13}\text{C}\{1\text{H}\}$ NMR (100 MHz,  $\text{CDCl}_3$ )  $\delta$  170.7, 149.7, 134.0, 129.0, 126.2, 125.5, 121.8, 82.3, 27.6, 8; IR ( $\text{cm}^{-1}$ ): 3049, 2972, 2935, 2880, 1753, 1615, 1598, 1465, 1284; HRMS (ESI-TOF): ( $[\text{M}+\text{H}]^+$ ) calcd for  $\text{C}_{10}\text{H}_{12}\text{O}_2^+$ : 163.0759; found: 163.0755.

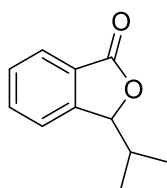

**3-isopropylisobenzofuran-1(3H)-one (3u):** The title compound was prepared according to the general procedure A. Colorless oil (36.4 mg, 69% yield).  $^1\text{H}$  NMR (400 MHz,  $\text{CDCl}_3$ )  $\delta$  7.89 – 7.87(m, 1H), 7.67 – 7.63 (m, 1H), 7.52 – 7.48 (m, 1H), 7.44 – 7.42 (m, 1H), 5.35 (d,  $J = 3.0$  Hz, 1H), 2.31 – 2.22 (m, 1H), 1.11 (d,  $J = 6.9$  Hz, 3H), 0.78 (d,  $J = 6.9$  Hz, 3H);  $^{13}\text{C}\{1\text{H}\}$ NMR (101 MHz,  $\text{CDCl}_3$ )  $\delta$  170.8, 148.8, 133.8, 129.0, 126.7, 125.6, 122.1, 85.6, 32.3, 18.7, 15.6. IR ( $\text{cm}^{-1}$ ): 3054, 2968, 2933, 2898, 1745, 1710, 1612, 1596, 1465, 1284, 1064; HRMS (ESI-TOF): ( $[\text{M}+\text{H}]^+$ ) calcd for  $\text{C}_{11}\text{H}_{12}\text{O}_2^+$ : 177.0916; found: 177.0924.

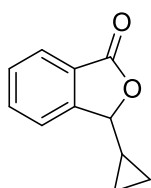

**3-cyclopropylisobenzofuran-1(3H)-one (3v):** The title compound was prepared according to the general procedure. White solid (34.1 mg, 65% yield).  $^1\text{H}$  NMR (400 MHz,  $\text{CDCl}_3$ )  $\delta$  7.86 (d,  $J = 7.6$  Hz, 1H), 7.68 – 7.61 (m, 1H), 7.56 – 7.47 (m, 2H), 4.83 (d,  $J = 8.4$  Hz, 1H), 1.06 (ddd,  $J = 12.9, 8.3, 4.8$  Hz, 1H), 0.76 – 0.65 (m, 2H), 0.61 (dd,  $J = 8.2, 6.1$  Hz, 2H);  $^{13}\text{C}$  NMR (101 MHz,  $\text{CDCl}_3$ )  $\delta$  170.4, 149.6, 148.4,

134.0, 129.2, 126.1, 125.5, 122.2, 85.2, 14.5, 2.8, 1.9; IR (cm<sup>-1</sup>): 3063, 2997, 1764, 1457, 1333, 1280, 1079, 1020, 967, 755; HRMS (ESI-TOF): ([M+H]<sup>+</sup>) calcd for C<sub>11</sub>H<sub>11</sub>O<sub>2</sub><sup>+</sup> 175.0759, found 175.0757.

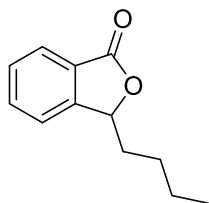

**3-butylisobenzofuran-1(3H)-one (3w):** The title compound was prepared according to the general procedure A. Colorless oil (31.9 mg, 56% yield). <sup>1</sup>H NMR (400 MHz, CDCl<sub>3</sub>) δ 7.92 – 7.83 (m, 1H), 7.70 – 7.62 (m, 1H), 7.54 – 7.47 (m, 1H), 7.45 – 7.40 (m, 1H), 5.46 (dd, *J* = 7.0, 3.5 Hz, 1H), 2.06 – 1.99 (m, 1H), 1.79 – 1.70 (m, 1H), 1.48 – 1.32 (m, 4H), 0.89 (t, *J* = 6.1 Hz, 3H); <sup>13</sup>C{<sup>1</sup>H}NMR (100 MHz, CDCl<sub>3</sub>) δ 170.7, 150.1, 133.9, 129.0, 126.1, 125.6, 121.7, 81.4, 34.4, 26.9, 22.4, 13.9; IR (cm<sup>-1</sup>): 2959, 2935, 2873, 1765, 1467, 1286, 1064, 763, 744, 696; HRMS (ESI-TOF): ([M+H]<sup>+</sup>) calcd for C<sub>10</sub>H<sub>11</sub>O<sub>2</sub><sup>+</sup>: 191.1072; found: 191.1066.

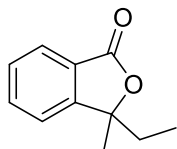

**3-ethyl-3-methylisobenzofuran-1(3H)-one (3x):** The title compound was prepared according to the general procedure A. Colorless oil (37.5 mg, 71% yield). <sup>1</sup>H NMR (400 MHz, CDCl<sub>3</sub>) δ 7.86 – 7.84 (m, 1H), 7.65 – 7.63 (m, 1H), 7.51 – 7.47 (m, 1H), 7.36 – 7.34 (m, 1H), 2.06 (dq, *J* = 14.7, 7.4 Hz, 1H), 1.90 (dq, *J* = 14.7, 7.4 Hz, 1H), 1.63 (s, 3H), 0.74 (t, *J* = 7.4 Hz, 3H); <sup>13</sup>C{<sup>1</sup>H}NMR (100 MHz, CDCl<sub>3</sub>) δ 170.1, 153.6, 134.0, 128.9, 126.2, 125.7, 120.9, 88.0, 32.8, 25.7, 7.8; IR (cm<sup>-1</sup>): 2974, 1749, 1614, 1465, 1345, 1286, 1129, 1060, 920, 761, 695; HRMS (ESI-TOF): ([M+H]<sup>+</sup>) calcd for C<sub>11</sub>H<sub>11</sub>O<sub>2</sub><sup>+</sup>: 177.0916; found: 199.0736.

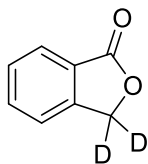

**isobenzofuran-1(3H)-one-3,3-d<sub>2</sub> (3y)**: The title compound was prepared according to the general procedure A. White solid (26 mg, 64% yield). <sup>1</sup>H NMR (400 MHz, CDCl<sub>3</sub>) δ 7.90-7.88 (m, 1H), 7.68-7.65 (m, 1H), 7.53-7.47 (m, 1H); <sup>13</sup>C NMR (101 MHz, CDCl<sub>3</sub>) δ 171.1, 146.4, 134.0, 129.0, 125.7, 122.1. IR (cm<sup>-1</sup>): 1755, 1621, 1595, 1464, 1384, 1263, 1193, 1126, 1018, 1007, 948, 722.

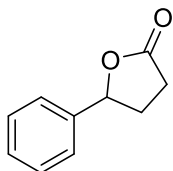

**5-phenyldihydrofuran-2(3H)-one (5a)**<sup>[4]</sup>: The title compound was prepared according to the general procedure A. Colorless oil (37.9 mg, 78% yield). <sup>1</sup>H NMR (400 MHz, CDCl<sub>3</sub>) δ 7.39 – 7.30 (m, 5H), 5.49 (t, *J* = 6.8 Hz, 1H), 2.68 – 2.61 (m, 3H), 2.21 – 2.13 (m, 1H); <sup>13</sup>C{<sup>1</sup>H}NMR (100 MHz, CDCl<sub>3</sub>) δ 176.9, 139.3, 128.7, 128.4, 125.2, 81.2, 30.9, 28.9. IR (cm<sup>-1</sup>): 2961, 1774, 1216, 1175, 1141, 1024, 940, 759, 700; HRMS (ESI-TOF): ([M+H]<sup>+</sup>) calcd for C<sub>10</sub>H<sub>11</sub>O<sub>2</sub><sup>+</sup>: 163.0759; found: 163.0765.

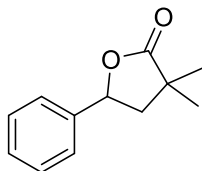

**3,3-dimethyl-5-phenyldihydrofuran-2(3H)-one (5b)**<sup>[4]</sup>: The title compound was prepared according to the general procedure A. Colorless oil (39.3 mg, 69% yield). <sup>1</sup>H NMR (400 MHz, CDCl<sub>3</sub>) δ 7.43 – 7.26 (m, 5H), 5.42 (d, *J* = 6.5 Hz, 1H), 2.51 – 2.43 (m, 1H), 2.05 (t, *J* = 11.3 Hz, 1H), 1.35 (s, 3H), 1.29 (s, 3H); <sup>13</sup>C{<sup>1</sup>H}NMR (101 MHz, CDCl<sub>3</sub>) δ 181.7, 139.5, 128.7, 128.3, 125.3, 77.6, 46.0, 40.8, 24.9, 24.2; HRMS

(ESI-TOF): ( $[M+H]^+$ ) calcd for  $C_{10}H_{11}O_2^+$ : 191.1072; found: 191.1077.

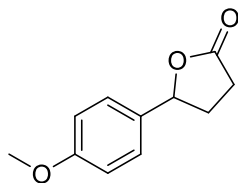

**5-(4-methoxyphenyl)dihydrofuran-2(3H)-one (5c)**<sup>[4]</sup>: The title compound was prepared according to the general procedure A. Yellow solid (35.1 mg, 61% yield).  $^1H$  NMR (400 MHz,  $CDCl_3$ )  $\delta$  7.27 – 7.24 (m, 2H), 6.92 – 6.90 (m, 2H), 5.47 – 5.45 (m, 1H), 3.81 (s, 3H), 2.66 – 2.59 (m, 3H), 2.21 – 2.16 (m, 1H);  $^{13}C\{^1H\}$ NMR (100 MHz,  $CDCl_3$ )  $\delta$  176.9, 159.7, 131.1, 126.9, 114.1, 81.3, 55.3, 30.9, 29.2; IR ( $cm^{-1}$ ): 3527, 2940, 2360, 1775, 1514, 1249, 1027, 834; HRMS (ESI-TOF): ( $[M+H]^+$ ) calcd for  $C_{10}H_{11}O_2^+$ : 191.1072; found: 191.1077.

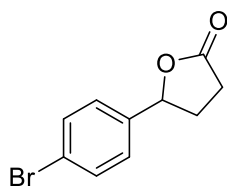

**5-(4-bromophenyl)dihydrofuran-2(3H)-one (5d)**<sup>[4]</sup>: The title compound was prepared according to the general procedure A. White solid (43.2 mg, 60% yield).  $^1H$  NMR (400 MHz,  $CDCl_3$ )  $\delta$  7.49 – 7.47 (m, 2H), 7.19 – 7.17 (m, 2H), 5.42 – 5.40 (m, 1H), 2.62 – 2.59 (m, 3H), 2.14 – 2.08 (m, 1H);  $^{13}C\{^1H\}$ NMR ( $CDCl_3$ , 100 MHz)  $\delta$  176.6, 138.4, 131.9, 127.0, 122.3, 80.5, 30.9, 28.9; IR ( $cm^{-1}$ ): 3532, 2927, 1782, 1489, 1174, 1018, 810; HRMS (ESI-TOF): ( $[M+H]^+$ ) calcd for  $C_{10}H_{10}BrO_2^+$ : 240.9864; found: 240.9869.

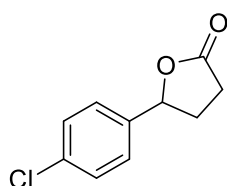

**5-(4-chlorophenyl)dihydrofuran-2(3H)-one (5e)**<sup>[4]</sup>: The title compound was

prepared according to the general procedure A. Red thick oil (38.2 mg, 65% yield).  $^1\text{H}$  NMR (400 MHz,  $\text{CDCl}_3$ )  $\delta$  7.35 – 7.33 (m, 2H), 7.26 – 7.24 (m, 2H), 5.46 – 5.45 (m, 1H), 2.70 – 2.64 (m, 3H), 2.16 – 2.10 (m, 1H);  $^{13}\text{C}\{1\text{H}\}$ NMR ( $\text{CDCl}_3$ , 100 MHz)  $\delta$  176.5, 137.9, 134.3, 129.0, 126.7, 80.4, 30.9, 28.9; IR ( $\text{cm}^{-1}$ ): 3533, 2932, 2361, 1781, 1492, 1175, 1021, 812; HRMS (ESI-TOF): ( $[\text{M}+\text{H}]^+$ ) calcd for  $\text{C}_{10}\text{H}_9\text{ClO}_2^+$ : 197.0369; found: 197.0374.

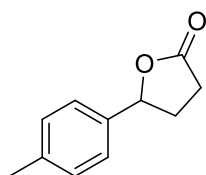

**5-(p-tolyl)dihydrofuran-2(3H)-one (5f)**<sup>[4]</sup>: The title compound was prepared according to the general procedure A. White solid (35.9 mg, 68% yield).  $^1\text{H}$  NMR (400 MHz,  $\text{CDCl}_3$ )  $\delta$  7.25 – 7.17 (m, 4H), 5.46 – 5.45 (m, 1H), 2.62 – 2.56 (m, 3H), 2.34 (s, 3H), 2.24 – 2.09 (m, 1H);  $^{13}\text{C}\{1\text{H}\}$ NMR (100 MHz,  $\text{CDCl}_3$ )  $\delta$  177.1, 138.3, 136.3, 129.4, 125.4, 81.4, 30.9, 29.1, 21.1; IR ( $\text{cm}^{-1}$ ): 3505, 2928, 1770, 1455, 1180, 940; HRMS (ESI-TOF): ( $[\text{M}+\text{H}]^+$ ) calcd for  $\text{C}_{11}\text{H}_{13}\text{O}_2^+$ : 177.0916; found: 177.0921.

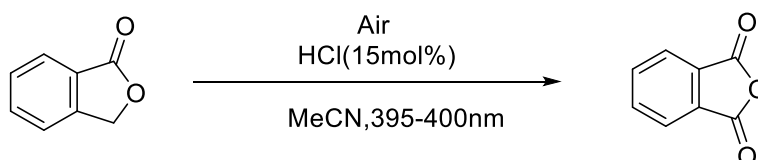

**isobenzofuran-1,3-dione (10)**: Phthalide (40.2 mg, 0.3 mmol, 1.0 equiv.), HCl (4  $\mu\text{L}$ , 0.045 mmol, 12.27 mol/L, 38% in water) and MeCN (3.0 ml) was added to an oven-dried quartz tube equipped with magnetic stirring bar. The vessel placed 2 cm away from one purple 20 W LED (395-400 nm). The reaction mixture was irradiated with for 8 h under air atmosphere. After irradiation, the reaction mixture was transferred to a 25 mL round-bottom flask and the solvent was concentrated in vacuo. The pure product was obtained by flash column chromatography on silica gel (97% yield).  $^1\text{H}$  NMR (400 MHz,  $\text{CDCl}_3$ )  $\delta$  8.06 – 7.99 (m, 2H), 7.96 – 7.90 (m, 2H);

$^{13}\text{C}\{1\text{H}\}$ NMR (100 MHz,  $\text{CDCl}_3$ )  $\delta$  162.8, 136.1, 131.2, 125.7; IR ( $\text{cm}^{-1}$ ): 3092, 1851, 1762, 1698, 1470, 1360, 1258, 1170, 905, 712

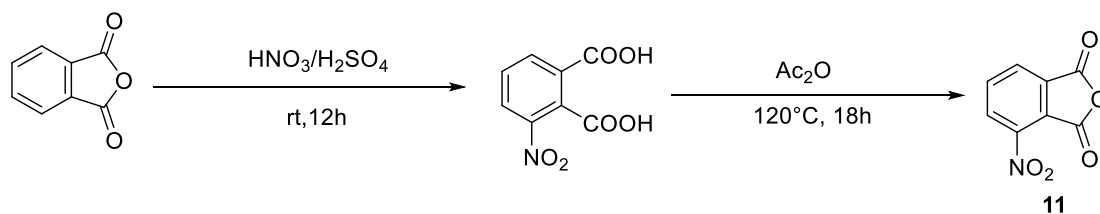

**4-nitroisobenzofuran-1,3-dione (11):** To a stirred solution of nitric acid and sulfuric acid (0.086 mL: 0.220 mL) at 0 °C was added phthalic anhydride (0.104 g, 0.70 mmol) in small portions. The reaction mixture was stirred at room temperature for 12 h and then cooled to 0 °C. This was followed by the addition of crushed ice. The solid which precipitated out was filtered to afford the compound as a white solid (0.133 g; 90% yield). A stirred solution of 3-nitrophthalic acid (0.133 g, 0.63 mmol) in acetic anhydride (1.75 mL) was heated at 120 °C for 18 h. The reaction mixture was cooled and concentrated under reduced pressure. The crude solid obtained was washed with hexane and triturated with 20% diethyl ether in hexane to afford as an off-white solid (0.112 g; 94% yield). Then the combined yield is 85%. White solid; mp 165–168°C;  $^1\text{H}$  NMR (400 MHz,  $\text{CD}_3\text{OD}$ )  $\delta$  8.38 – 8.27 (m, 2H), 7.79 – 7.75 (m, 1H);  $^{13}\text{C}\{1\text{H}\}$ NMR (100 MHz,  $\text{CD}_3\text{OD}$ )  $\delta$  166.5, 165.1, 146.4, 135.5, 130.8, 130.4, 130.4, 127.8.

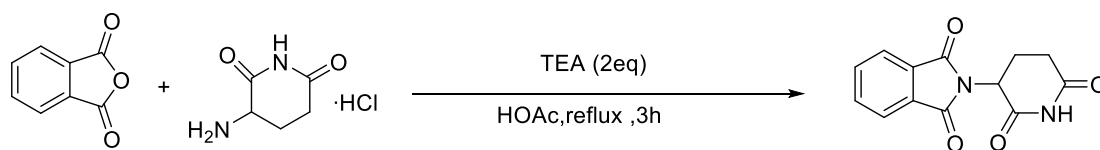

**2-(2,6-dioxopiperidin-3-yl)isoindoline-1,3-dione (Thalidomide):** To a stirred solution of 0.149 g (0.91 mmol) of 3-amino-piperidine-2,6-dione hydrochloride in 5 ml of acetic acid was added 0.135 g (0.91 mmol) of phthalic anhydride and 0.203 g (2 mmol) of triethyl amine. Reaction mixture was heated to reflux and further stirred at reflux for 3 hours. The progress and completion of reaction was monitored by HPLC

till 3-amino-piperidine-2, 6-dione hydrochloride absent. Reaction mass was cooled to 25-30 °C and further stirred for 1 hour at 25-30 °C. Solid was filtered and washed the wet cake with 7.5 mL of water. Wet compound was slurred in 5 mL of water and suspension mass was further stirred for 1 h. Solid was filtered and washed the wet cake with 7.5 mL of water. Dried under vacuum at 55-60 °C under vacuum to give 0.205 g thalidomide (87%, yield). mp 269-271°C; <sup>1</sup>H NMR (400 MHz, DMSO) δ 11.11 (s, 1H), 7.94 – 7.84 (m, 4H), 5.16 (dd, *J* = 6.8, 5.0 Hz, 1H), 2.95 – 2.80 (m, 1H), 2.62 – 2.47 (m, 2H), 2.11 – 2.00 (m, 1H); <sup>13</sup>C{<sup>1</sup>H}NMR (100 MHz, DMSO) δ 173.2, 170.3, 167.6, 135.3, 131.7, 123.9, 49.4, 31.4, 22.4; HRMS (ESI-TOF): ([M+Na]<sup>+</sup>) calcd for C<sub>13</sub>H<sub>10</sub>N<sub>2</sub>NaO<sub>4</sub><sup>+</sup>: 281.0538; found: 281.0544.

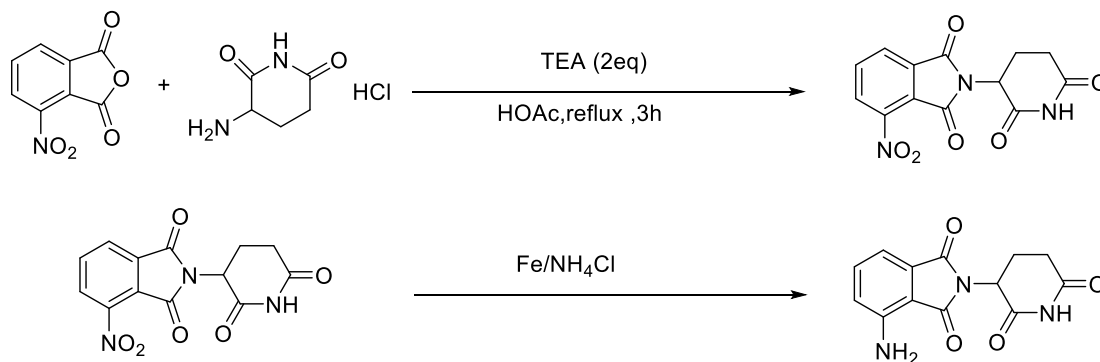

#### 4-amino-2-(2,6-dioxopiperidin-3-yl)isoindoline-1,3-dione (Pomalyst):

To 4-nitroisobenzofuran-1,3-dione (0.112 g, 0.58 mmol) in AcOH (5 mL) was added and 3-aminopiperidine-2,6-dione salt at room temperature acid salt (0.095 g, 0.58 mmol) and KOAc (0.114 g, 1.16 mmol) and stirred at 90 °C for 16 h under nitrogen atmosphere. After completion of the reaction (monitored by TLC), the acetic acid was removed under reduced pressure, and the residue was washed with methanol to give compound (0.153 g, 87%, yield), which was used in the next step without further purification.

Ammonium chloride (0.55 g, 1.02 mmol) was slowly added to the well-stirred water (0.5 mL) and 2.5mL solution of ethanol, then iron powder (0.112g, 2 mmol) was slowly added, and the stirring was continued to be heated to 90 °C, 3-nitro-N-



(2,6-dioxo-3-piperidyl)-phthalimide 0.153g (0.51 mmol) was added to the system within 30min, refluxed and stirred for 1h, concentrated, and then Extracted with methanol solution (5 mL), centrifuged, poured out the methanol solution containing the compound, concentrated and crystallized again to obtain the final compound Pomalyst (0.132 g, 95% yield), yellow solid. mp 252°C; <sup>1</sup>H NMR (400 MHz, DMSO) δ 11.07 (s, 1H), 7.56 – 7.36 (m, 1H), 7.12 – 6.91 (m, 2H), 6.50 (s, 2H), 5.03 (dd, J = 13.6, 5.2 Hz, 1H), 2.94 – 2.79 (m, 1H), 2.62 – 2.49 (m, 2H), 2.10 – 1.89 (m, 1H); <sup>13</sup>C{<sup>1</sup>H}NMR (100 MHz, DMSO) δ 173.3, 170.6, 169.0, 167.8, 147.2, 135.9, 132.4, 122.2, 111.4, 109.0, 48.9, 31.4, 22.6; HRMS (ESI-TOF): ([M+Na]<sup>+</sup>) calcd for C<sub>13</sub>H<sub>11</sub>N<sub>3</sub>NaO<sub>4</sub><sup>+</sup>: 296.0647; found: 296.0653.

## 6. References

1. Kopp, F.; Wunderlich, S.; Knochel, P, *Chem. Commun. (Cambridge, U. K.)* **2007**, 0, 2075.
2. Joe W. Wrigglesworth, Brian Cox, Guy C. Lloyd-Jones, and Kevin I. Booker-Milburn, *Organic Letters* **2011** 13 (19), 5326-5329.
3. Juan Mangas-Sánchez, Eduardo Busto, Vicente Gotor-Fernández, and Vicente Gotor, *Organic Letters* **2012** 14 (6), 1444-1447.
4. Chenxiao Qi, Shengwen Yang, Vincent Gandon, and David Lebœuf, *Organic Letters* **2019** 21 (18), 7405-7409.
5. Le Thi Ngoc Chuc, Thi Anh Hong Nguyen and Duen-Ren Hou, *Org. Biomol. Chem.*, 2020,**18**, 2758-2768

## 7. Copies of $^1\text{H}$ and $^{13}\text{C}$ NMR spectra of products

$^1\text{H}$  NMR spectrum (400 MHz,  $\text{CDCl}_3$ ) of compound **2a**

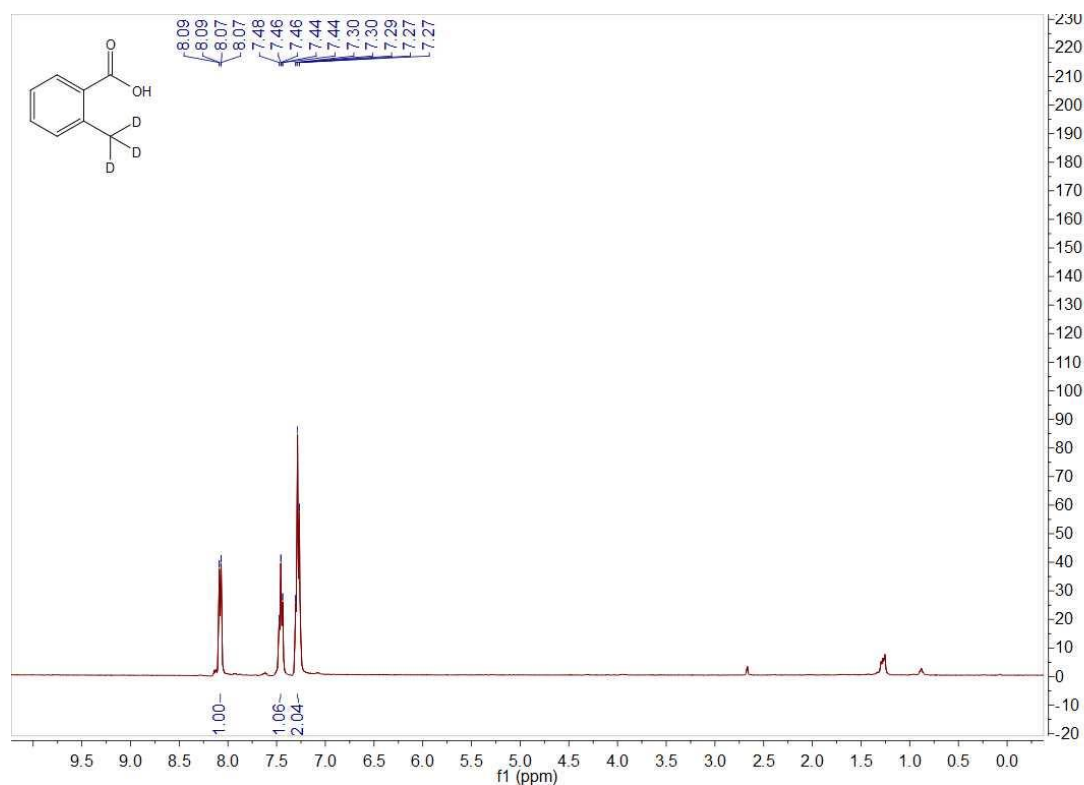

$^{13}\text{C}$  NMR spectrum (100 MHz,  $\text{CDCl}_3$ ) of compound **2a**

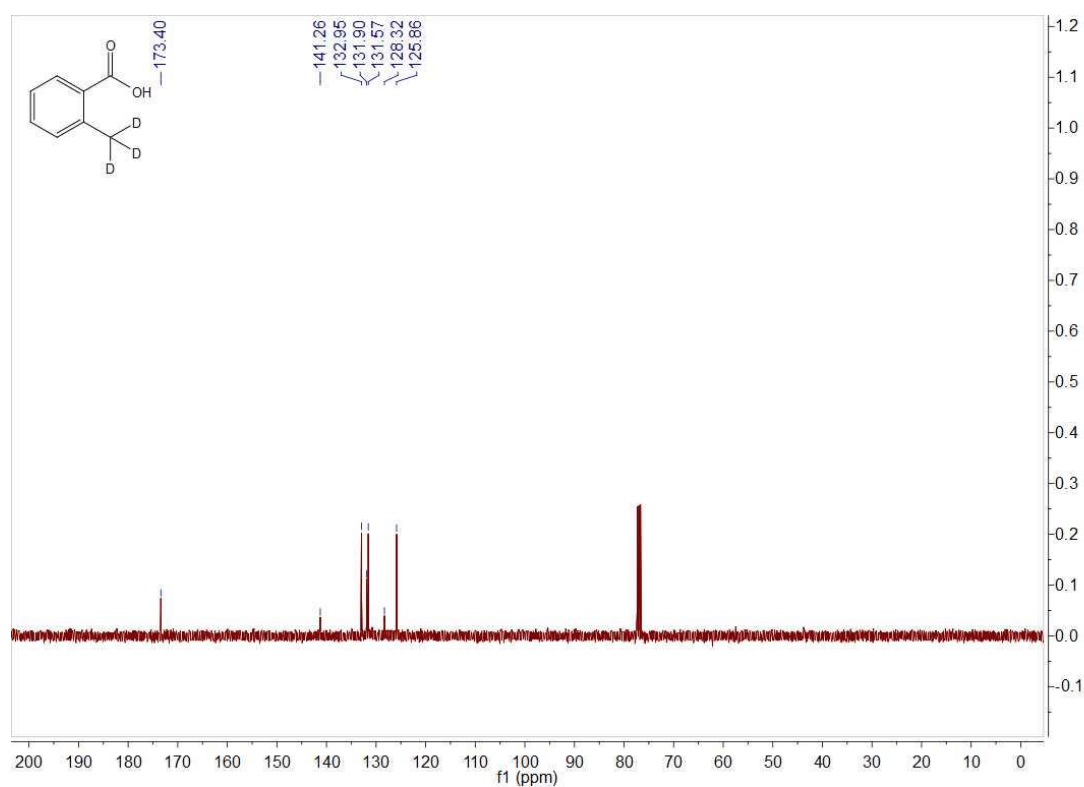

<sup>1</sup>H NMR spectrum (400 MHz, CDCl<sub>3</sub>) of compound **2b**

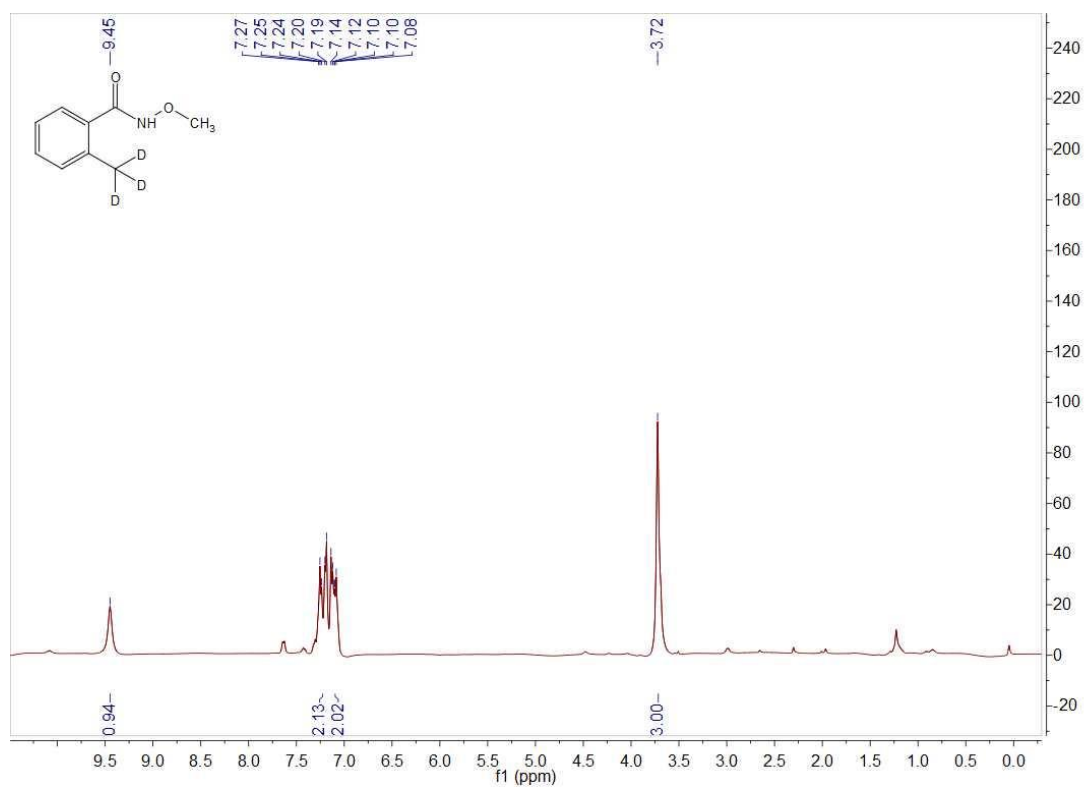

<sup>13</sup>C NMR spectrum (100 MHz, CDCl<sub>3</sub>) of compound **2b**

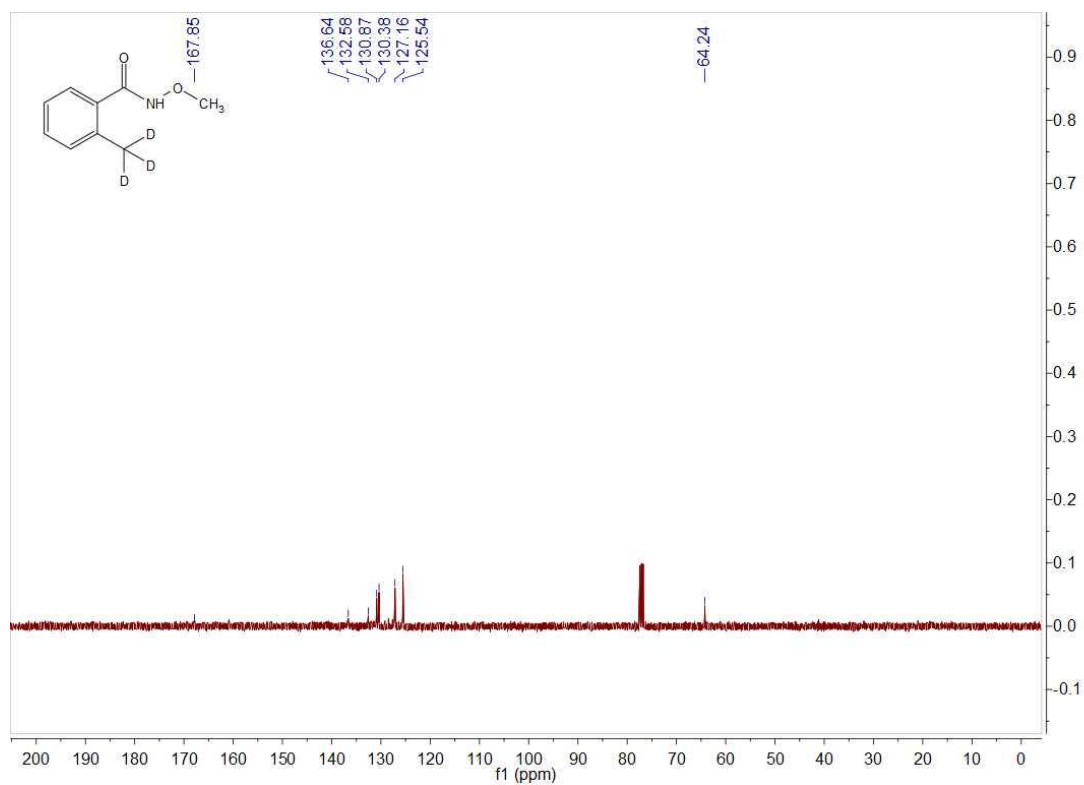

<sup>1</sup>H NMR spectrum (400 MHz, CDCl<sub>3</sub>) of compound **3a**

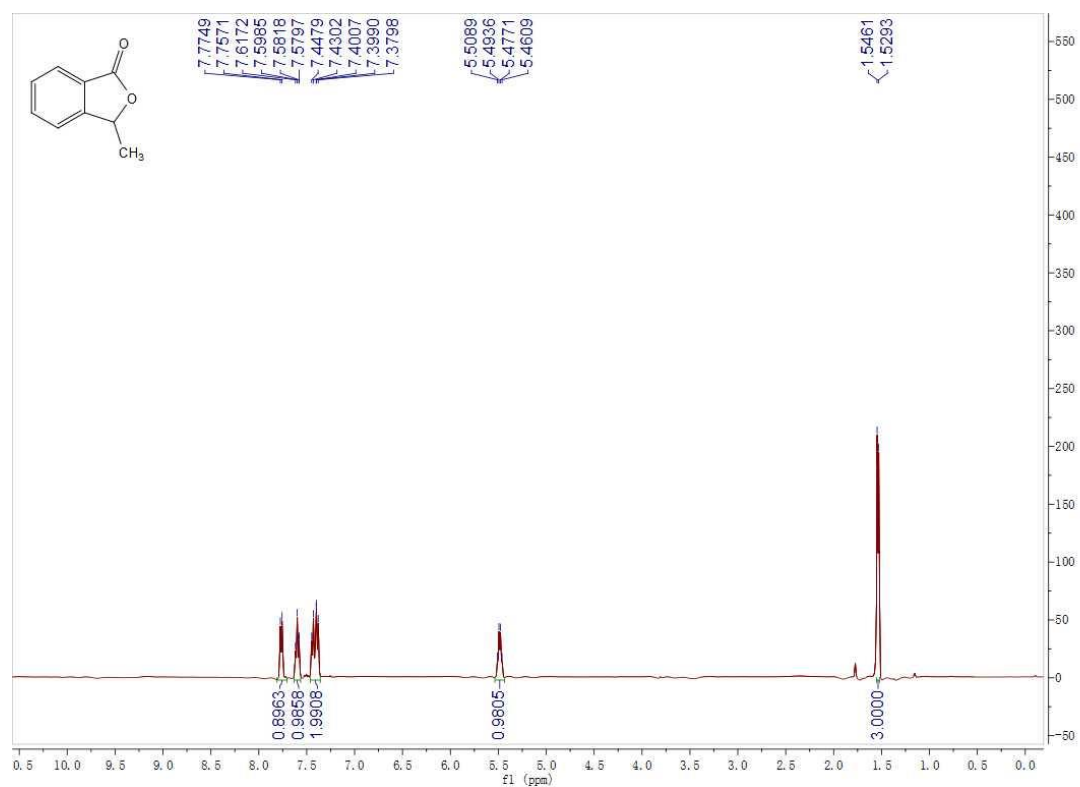

<sup>13</sup>C NMR spectrum (100 MHz, CDCl<sub>3</sub>) of compound **3a**

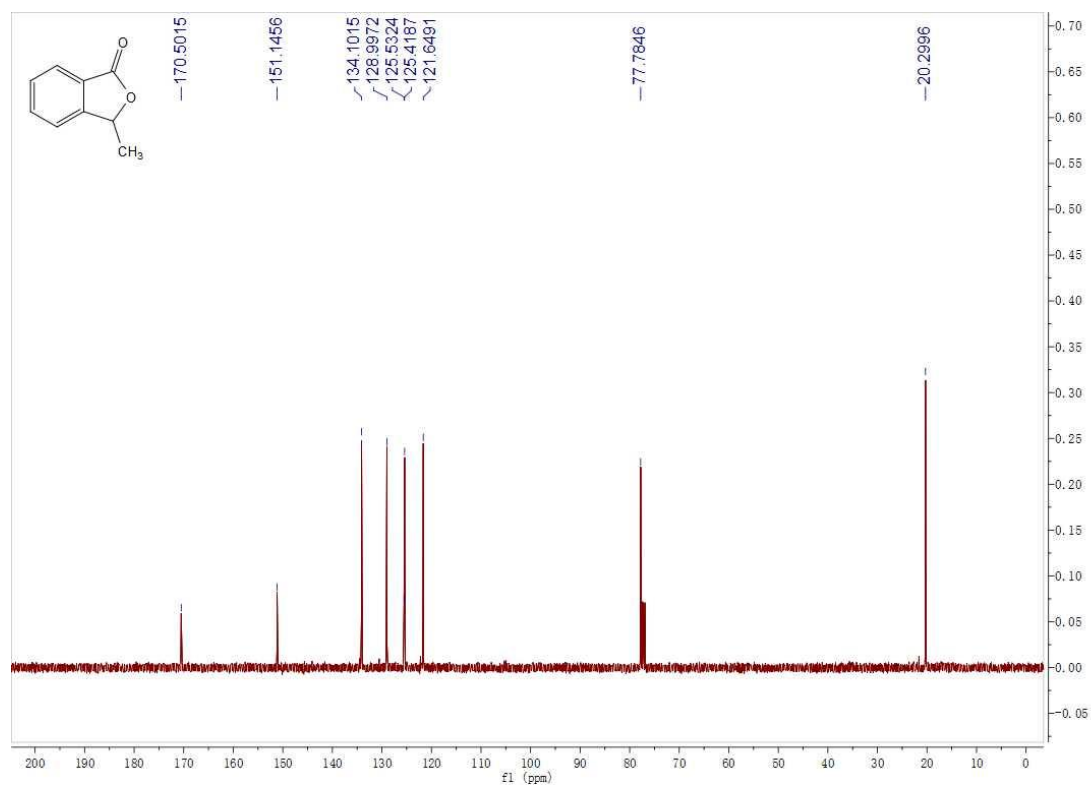

<sup>1</sup>H NMR spectrum (400 MHz, CDCl<sub>3</sub>) of compound **3b**

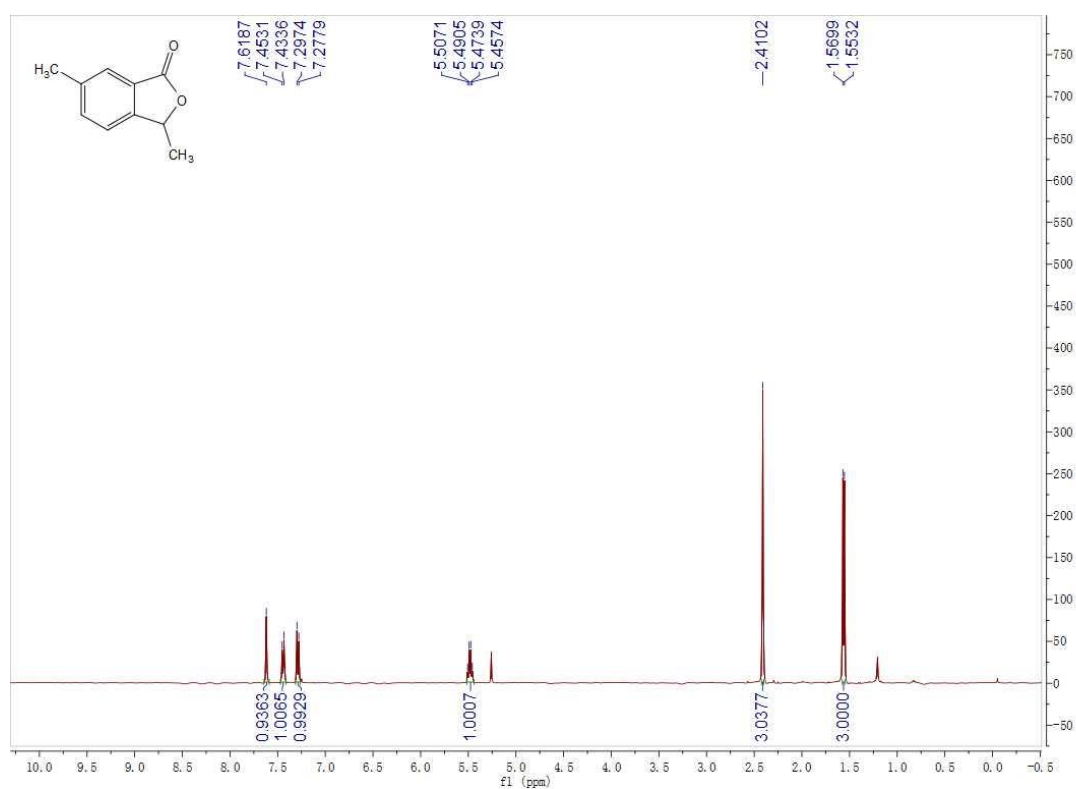

<sup>13</sup>C NMR spectrum (100 MHz, CDCl<sub>3</sub>) of compound **3b**

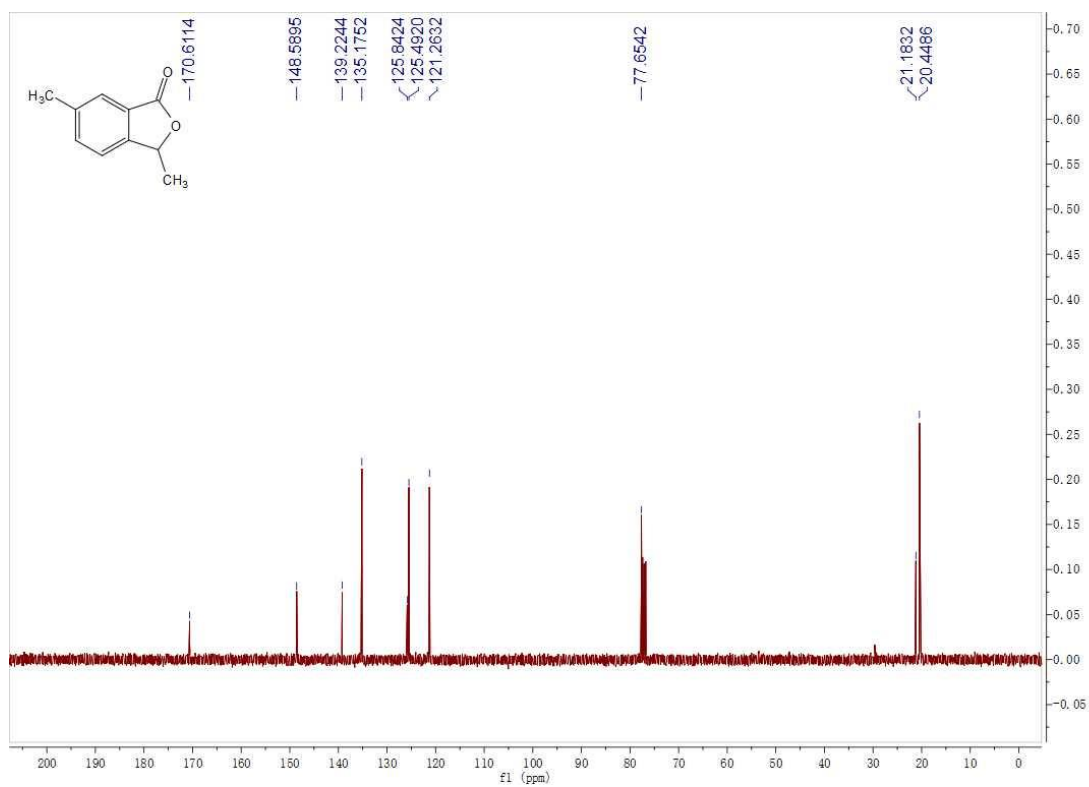

$^1\text{H}$  NMR spectrum (400 MHz,  $\text{CDCl}_3$ ) of compound **3c**

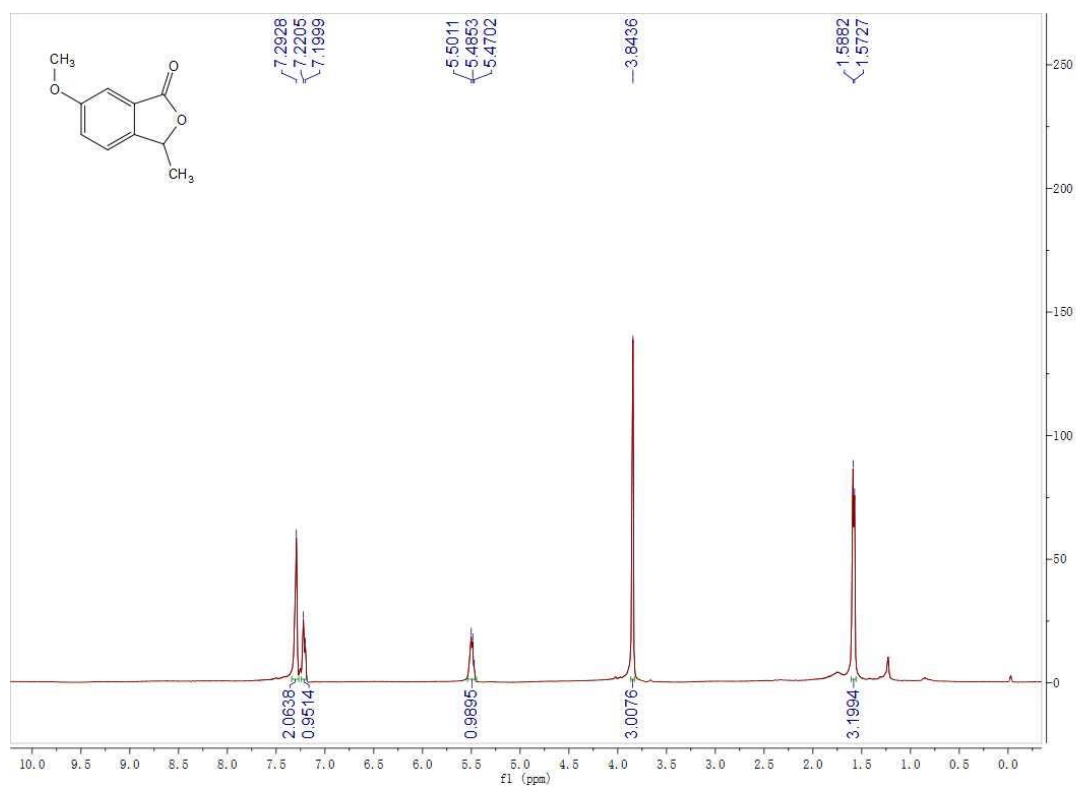

$^{13}\text{C}$  NMR spectrum (100 MHz,  $\text{CDCl}_3$ ) of compound **3c**

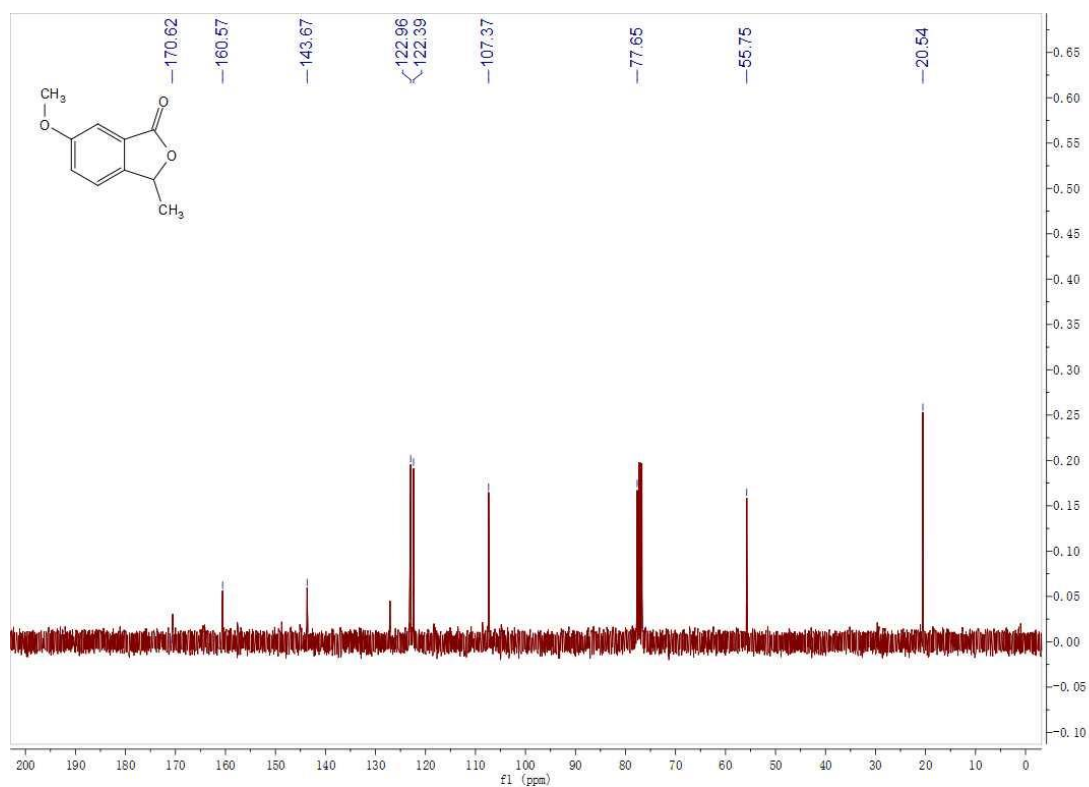

<sup>1</sup>H NMR spectrum (400 MHz, CDCl<sub>3</sub>) of compound **3d**

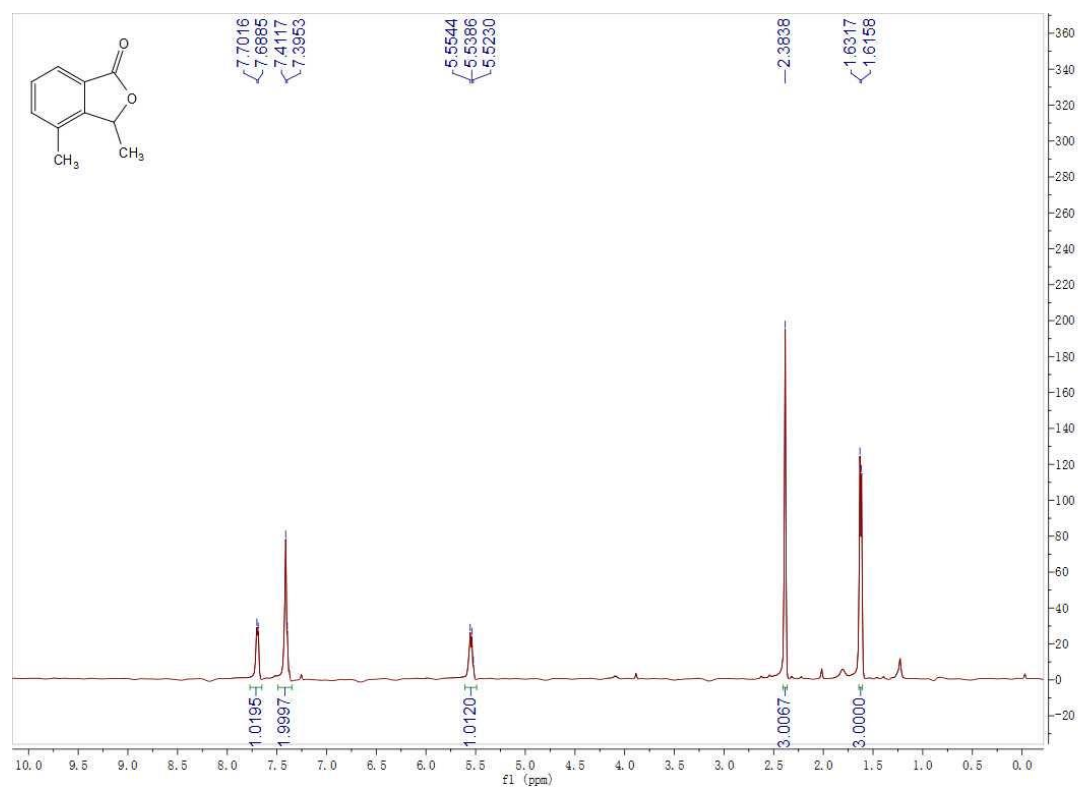

<sup>13</sup>C NMR spectrum (100 MHz, CDCl<sub>3</sub>) of compound **3d**

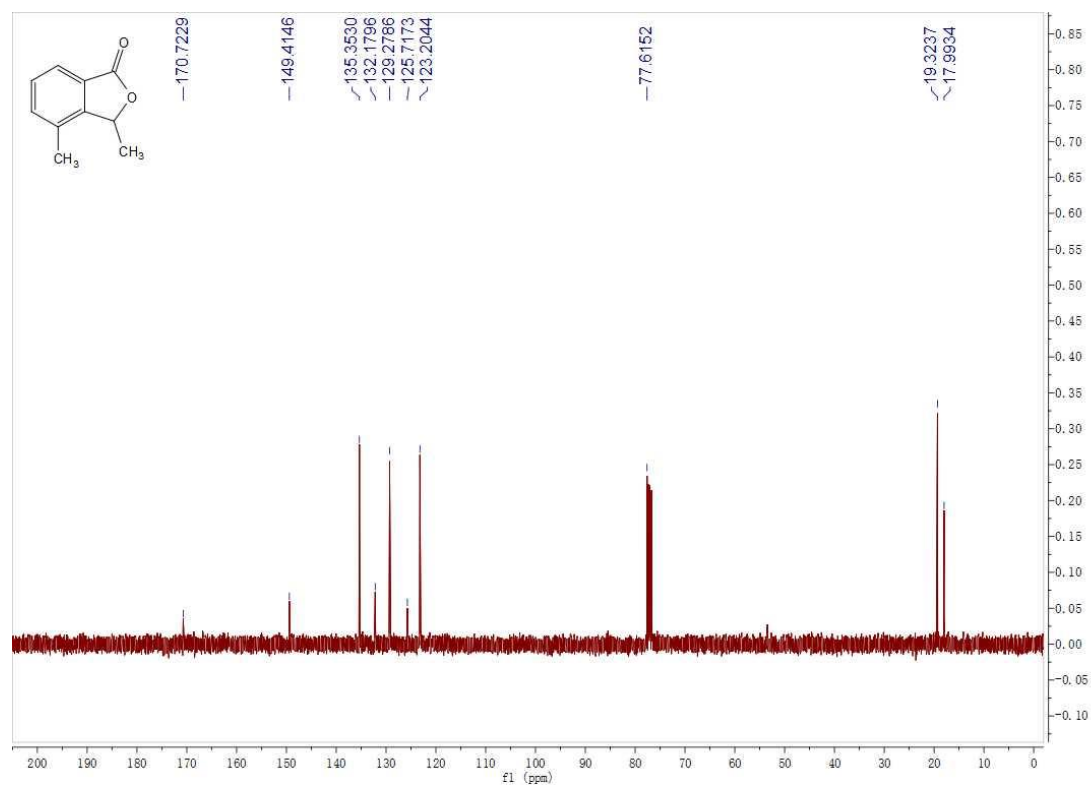

<sup>1</sup>H NMR spectrum (400 MHz, CDCl<sub>3</sub>) of compound **3e**

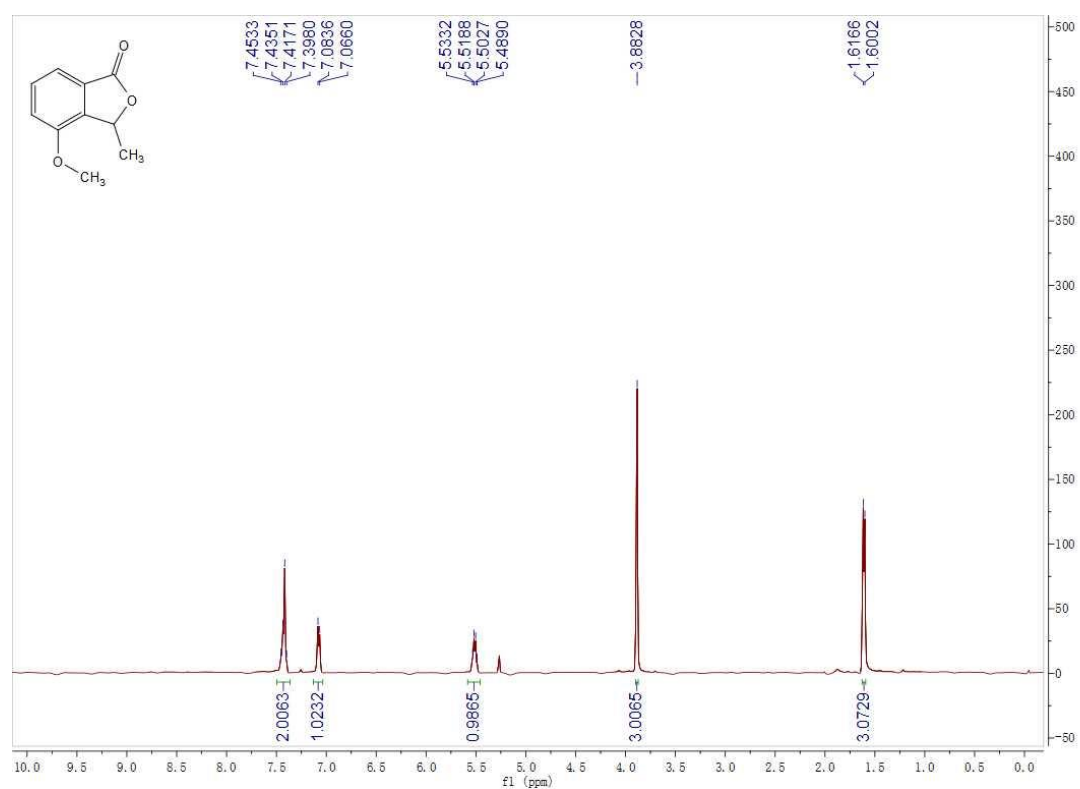

<sup>13</sup>C NMR spectrum (100 MHz, CDCl<sub>3</sub>) of compound **3e**

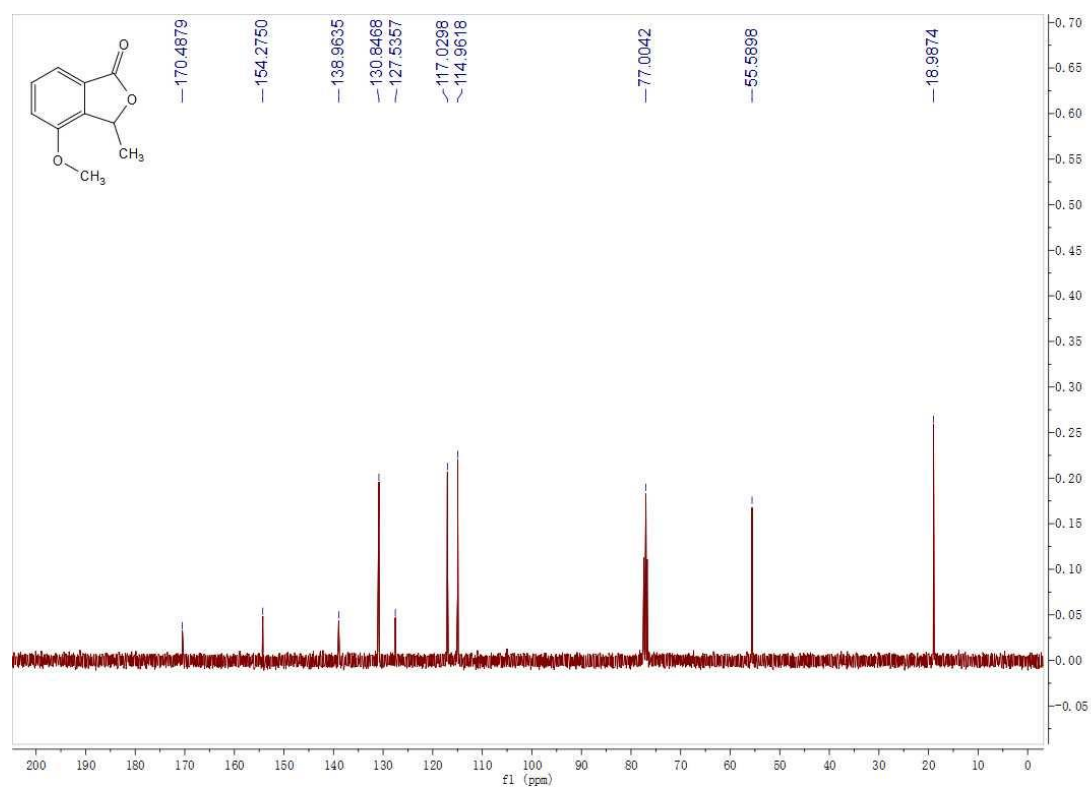



<sup>1</sup>H NMR spectrum (400 MHz, CDCl<sub>3</sub>) of compound **3f**

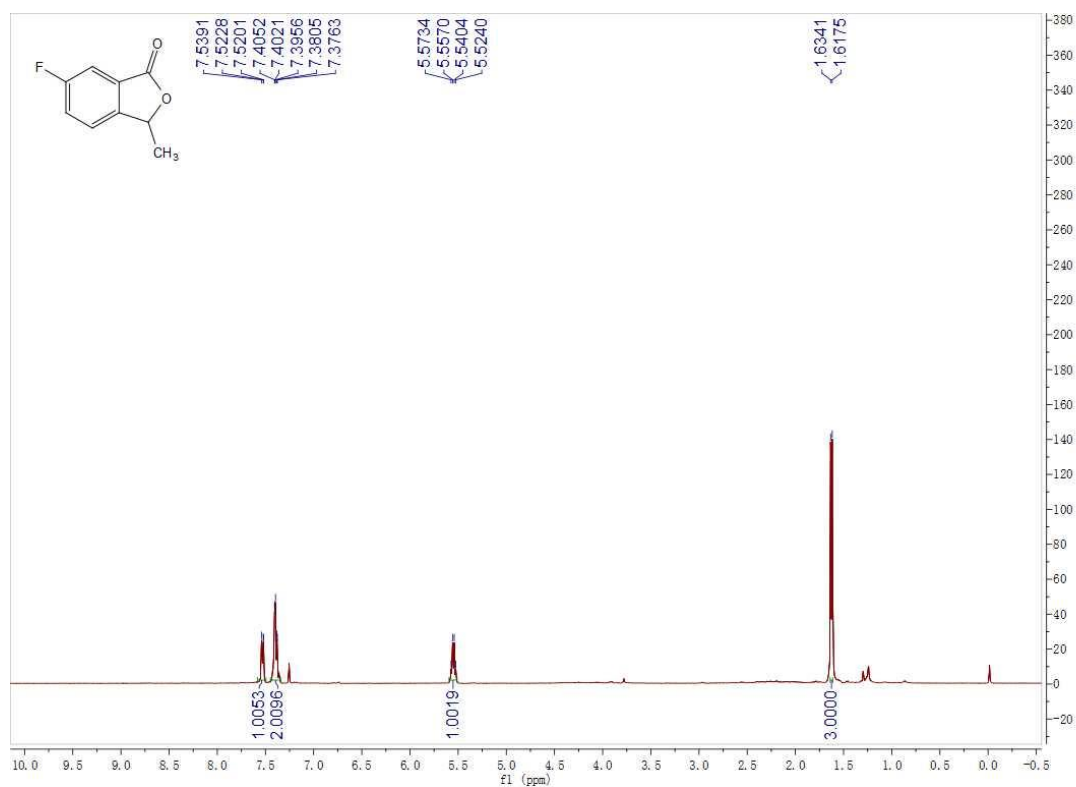

<sup>13</sup>C NMR spectrum (100 MHz, CDCl<sub>3</sub>) of compound **3f**

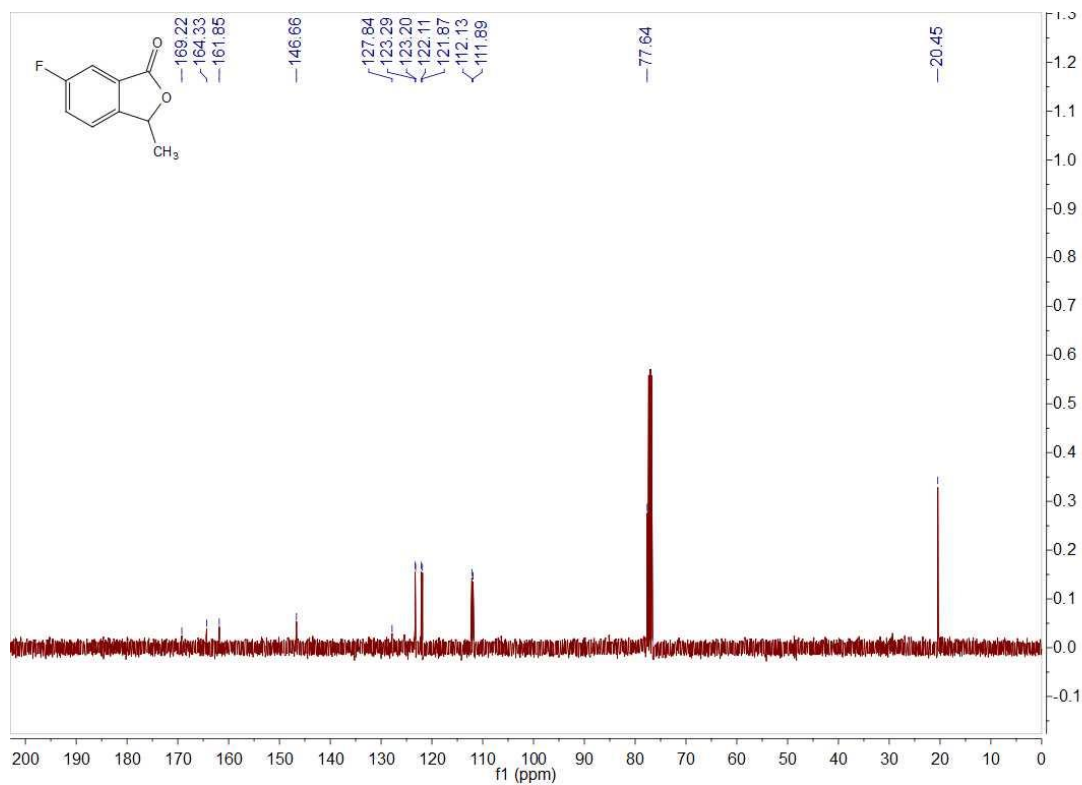

$^{19}\text{F}$  NMR spectrum (376 MHz,  $\text{CDCl}_3$ ) of compound **3f**

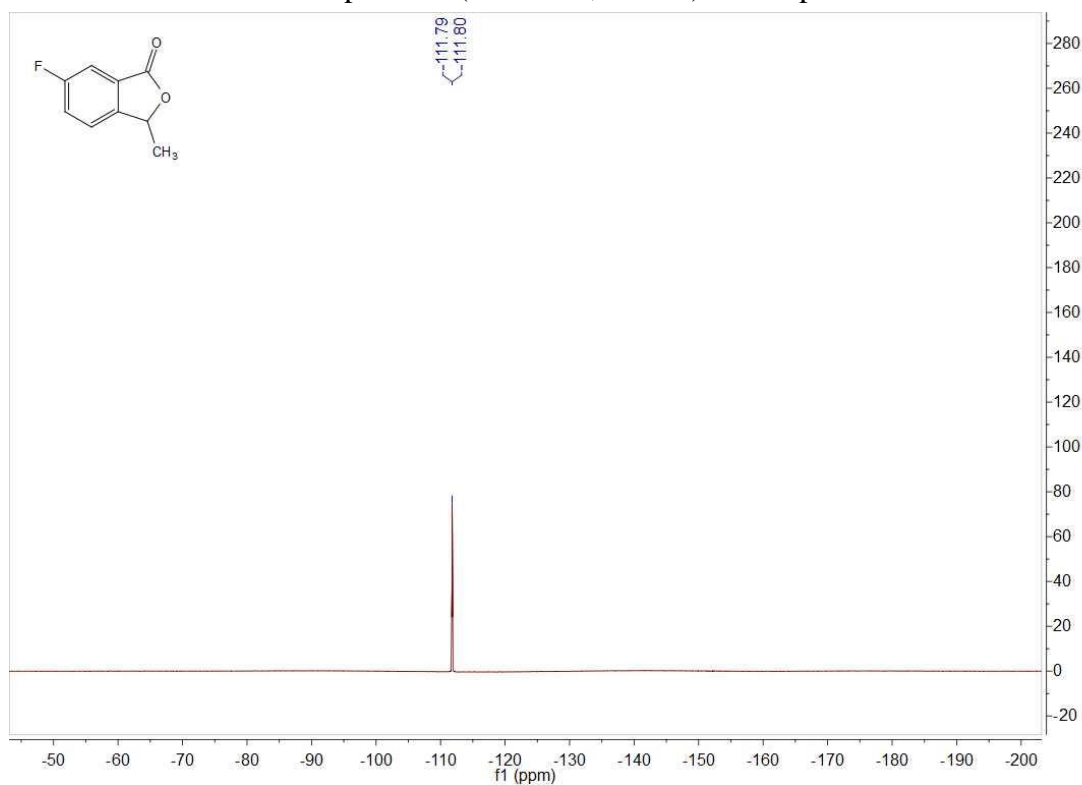

$^1\text{H}$  NMR spectrum (400 MHz,  $\text{CDCl}_3$ ) of compound **3g**

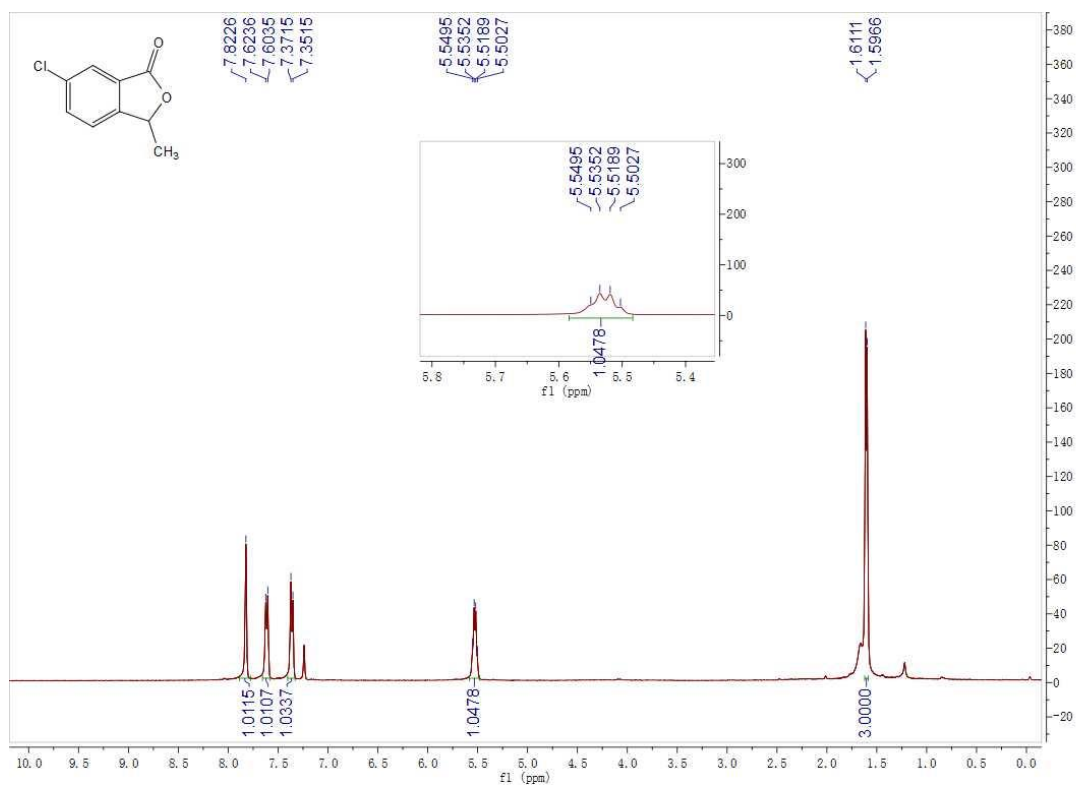

$^{13}\text{C}$  NMR spectrum (100 MHz,  $\text{CDCl}_3$ ) of compound **3g**

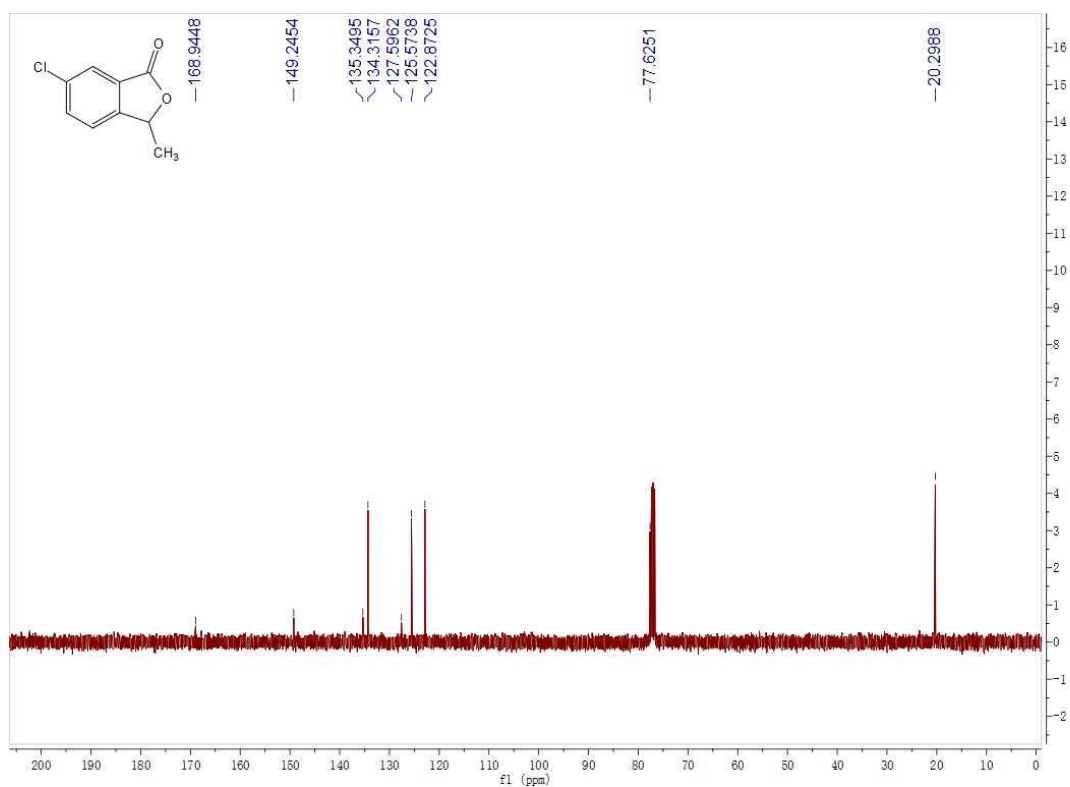

$^1\text{H}$  NMR spectrum (400 MHz,  $\text{CDCl}_3$ ) of compound **3h**

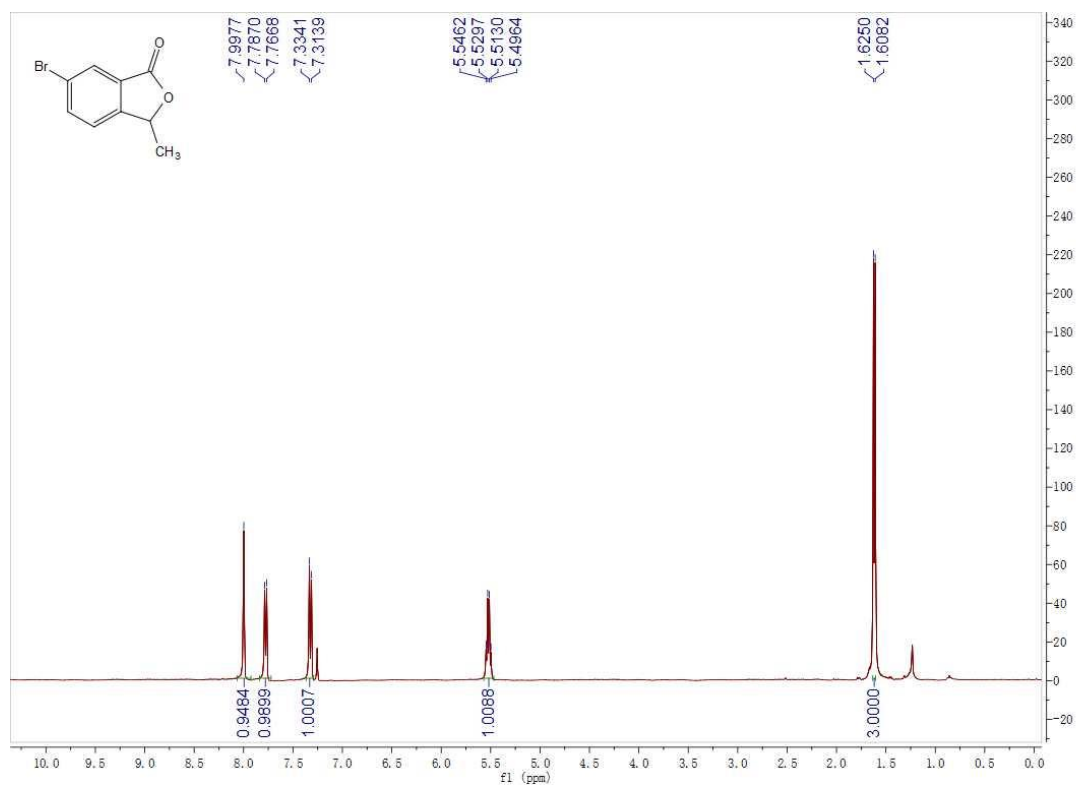

<sup>13</sup>C NMR spectrum (100 MHz, CDCl<sub>3</sub>) of compound **3h**

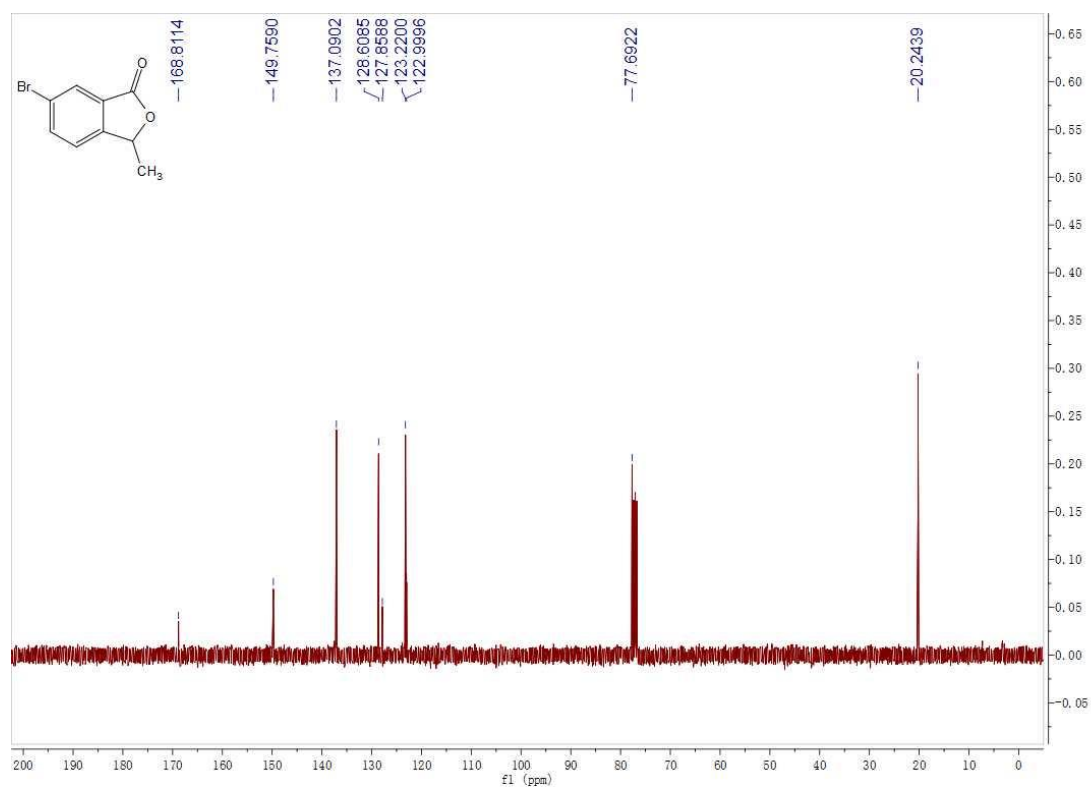

<sup>1</sup>H NMR spectrum (400 MHz, CDCl<sub>3</sub>) of compound **3i**

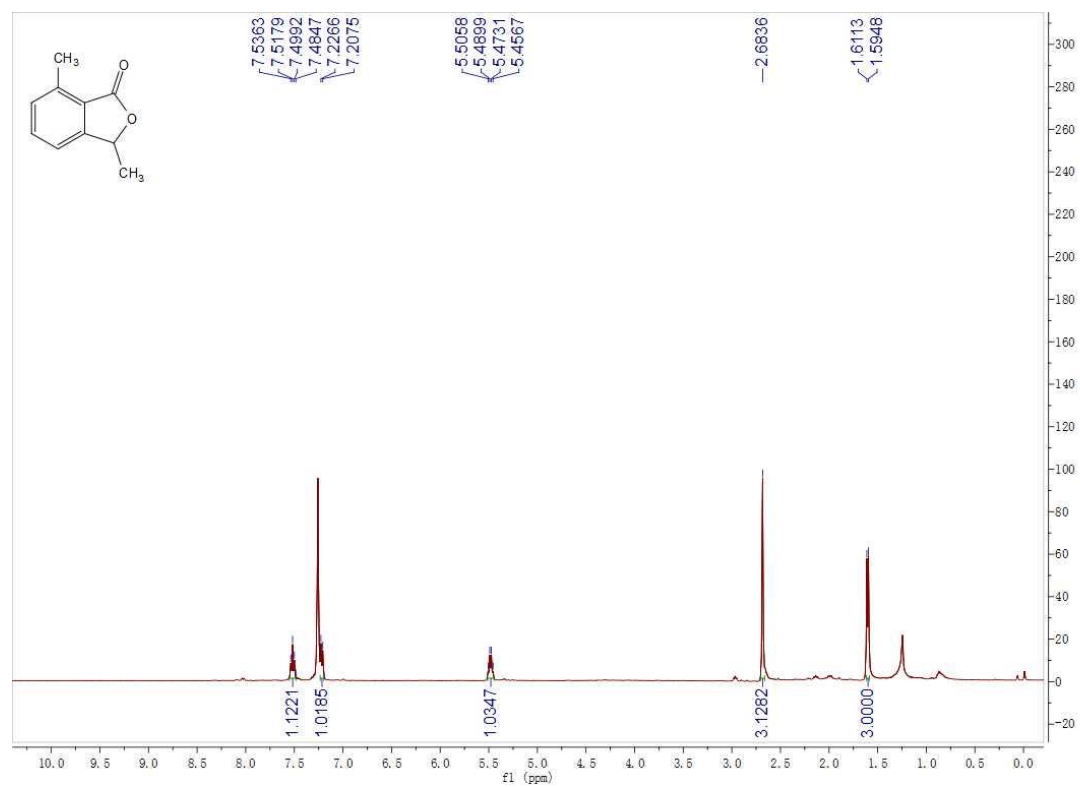

<sup>13</sup>C NMR spectrum (100 MHz, CDCl<sub>3</sub>) of compound **3i**

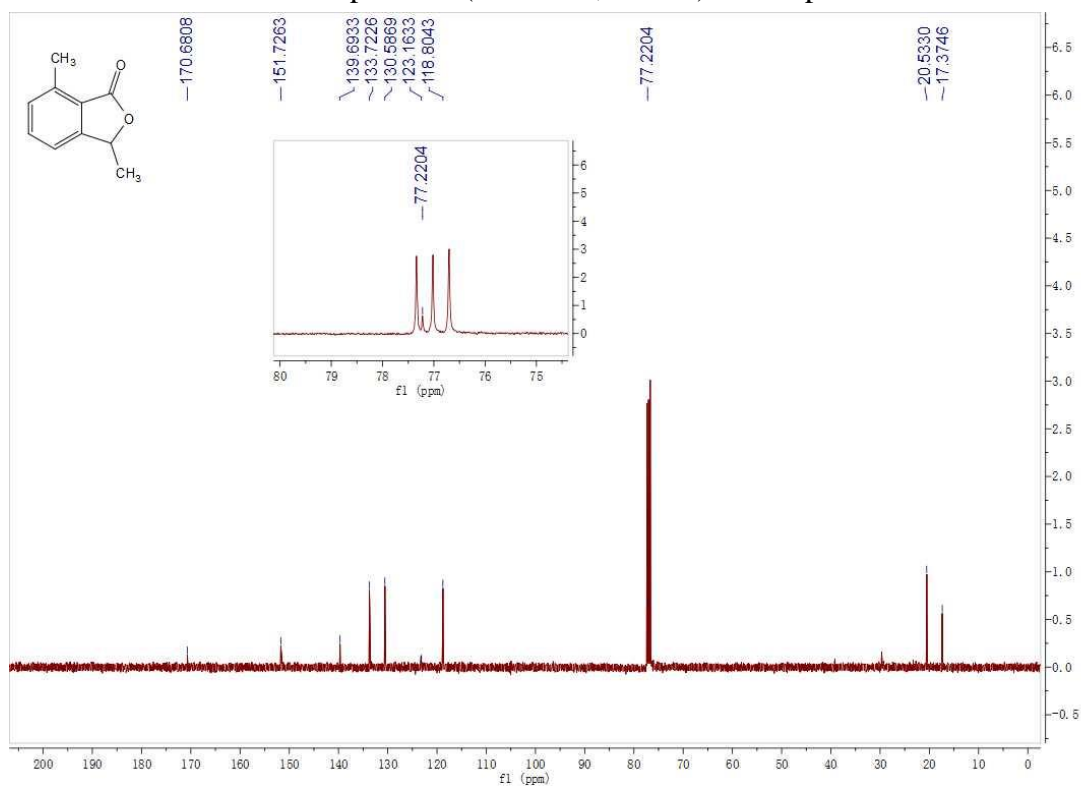

<sup>1</sup>H NMR spectrum (400 MHz, CDCl<sub>3</sub>) of compound **3j**

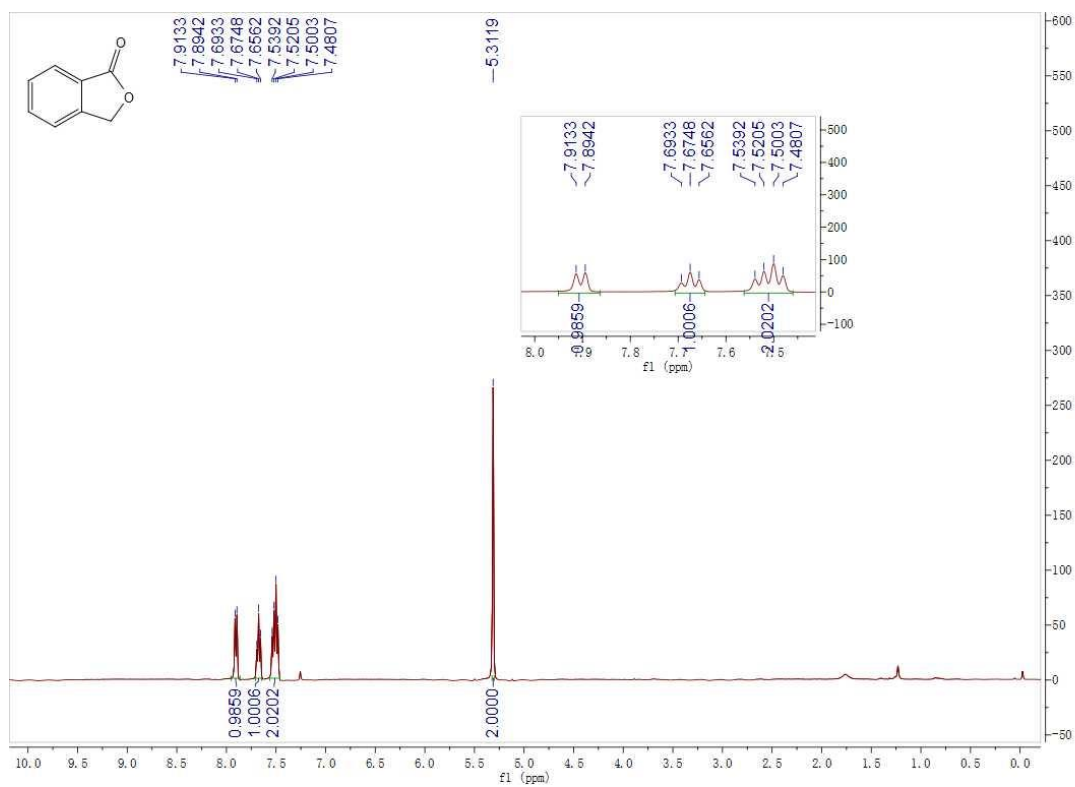

<sup>13</sup>C NMR spectrum (100 MHz, CDCl<sub>3</sub>) of compound **3j**

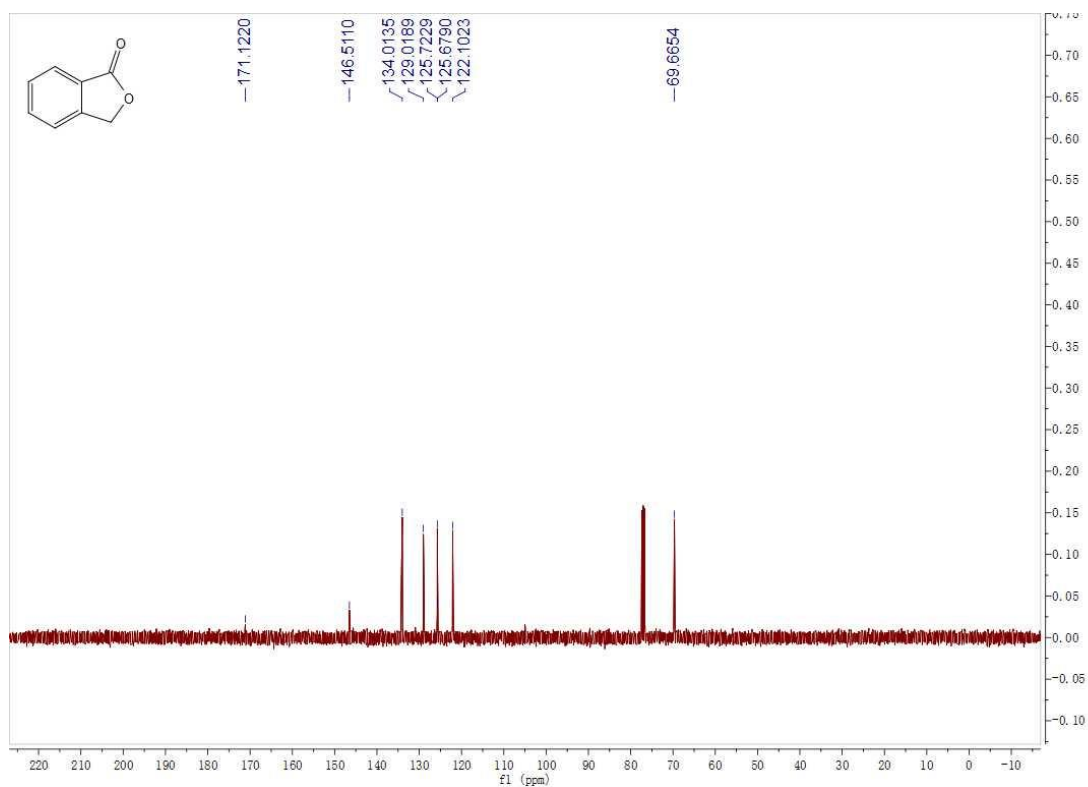

<sup>1</sup>H NMR spectrum (400 MHz, CDCl<sub>3</sub>) of compound **3k**

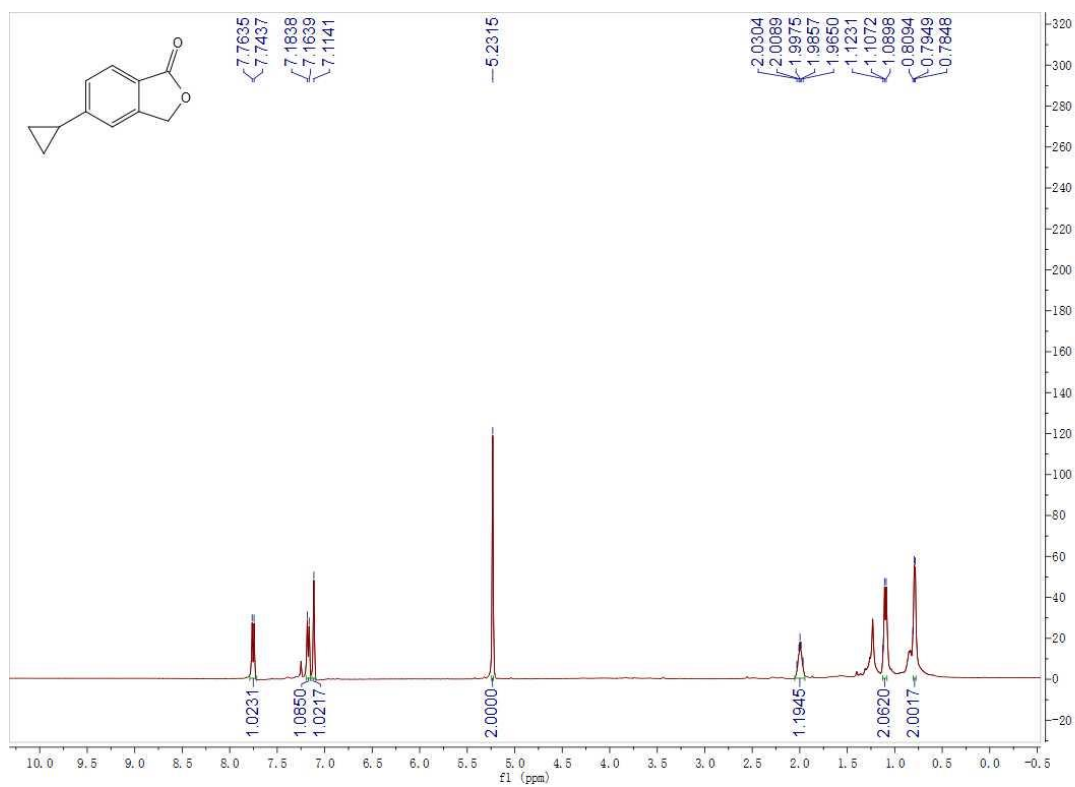

<sup>13</sup>C NMR spectrum (100 MHz, CDCl<sub>3</sub>) of compound **3k**

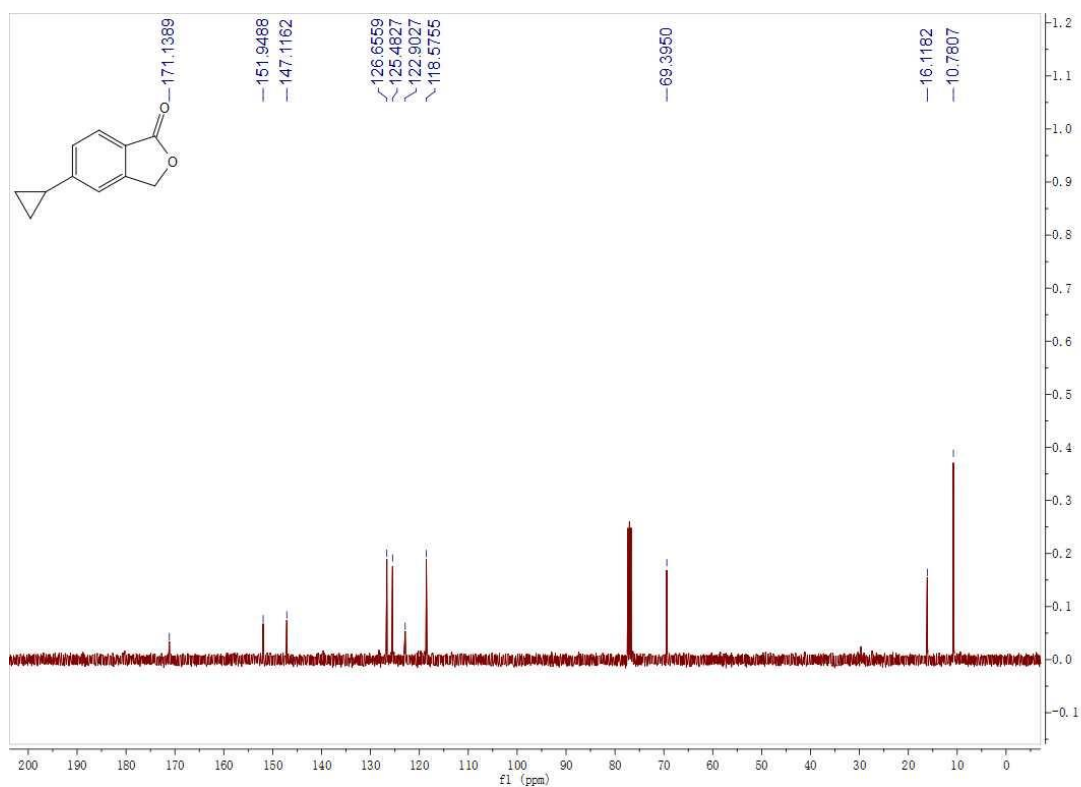

<sup>1</sup>H NMR spectrum (400 MHz, CDCl<sub>3</sub>) of compound **3l**

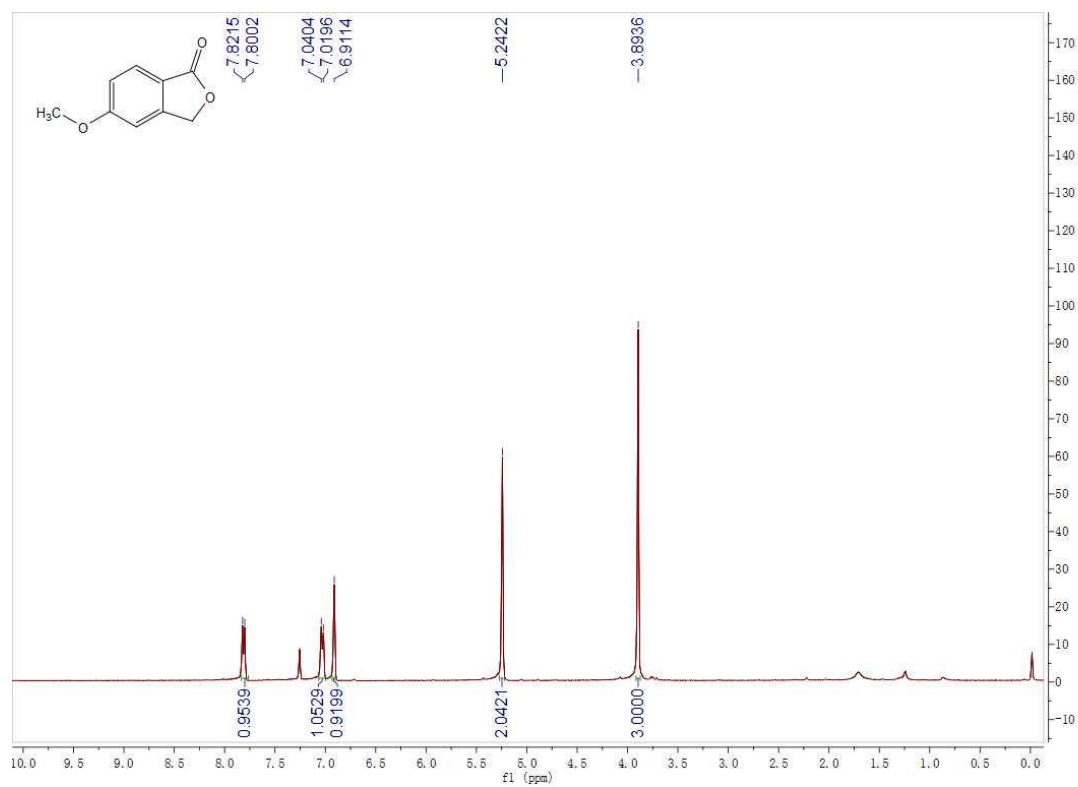

<sup>13</sup>C NMR spectrum (100 MHz, CDCl<sub>3</sub>) of compound **3l**

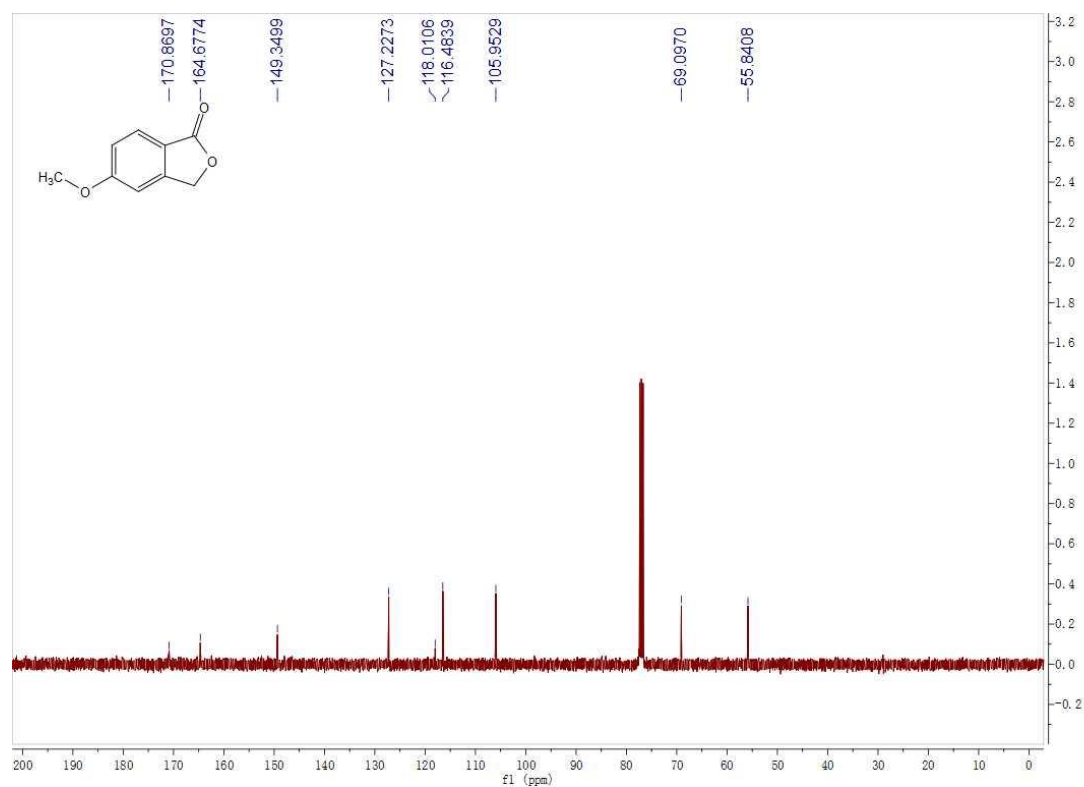

<sup>1</sup>H NMR spectrum (400 MHz, CDCl<sub>3</sub>) of compound **3m**

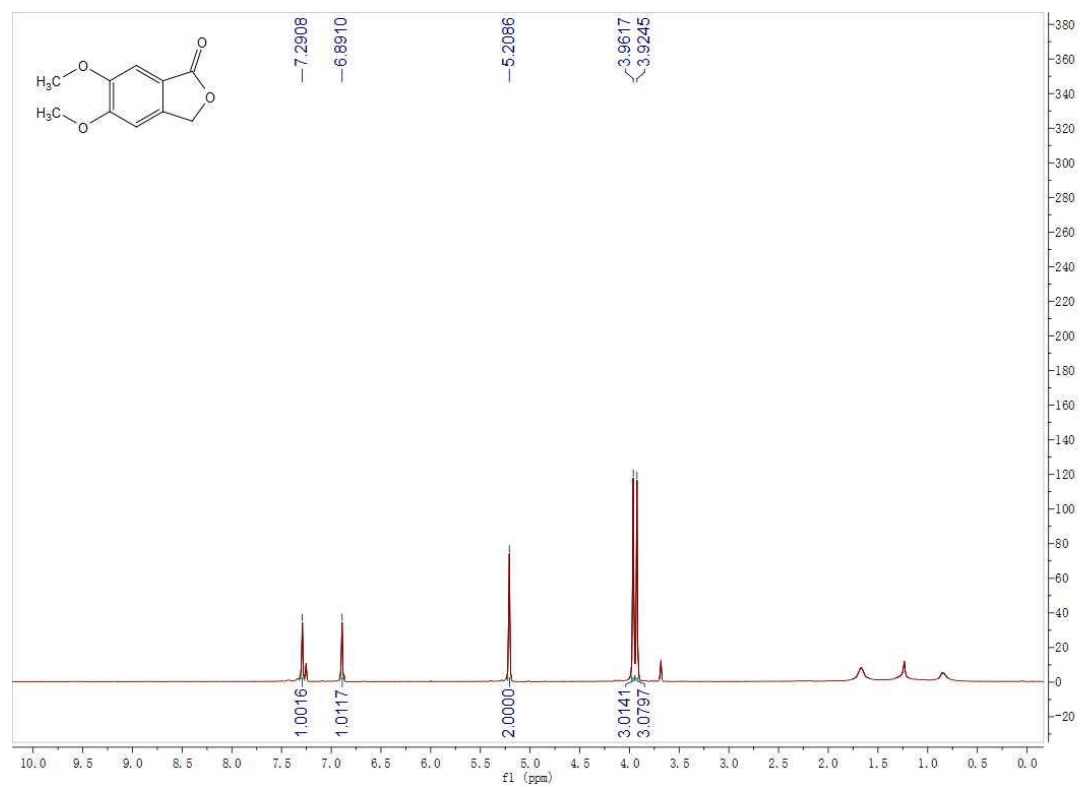



$^{13}\text{C}$  NMR spectrum (100 MHz,  $\text{CDCl}_3$ ) of compound **3m**

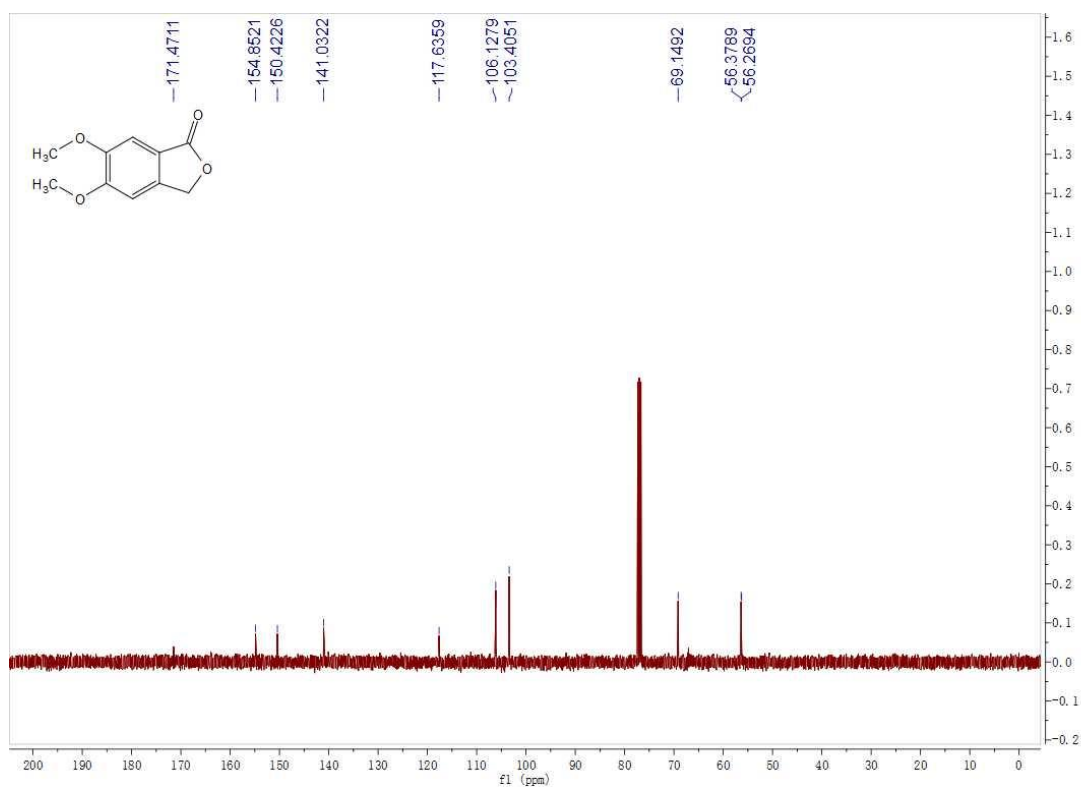

$^1\text{H}$  NMR spectrum (400 MHz,  $\text{CDCl}_3$ ) of compound **3n**

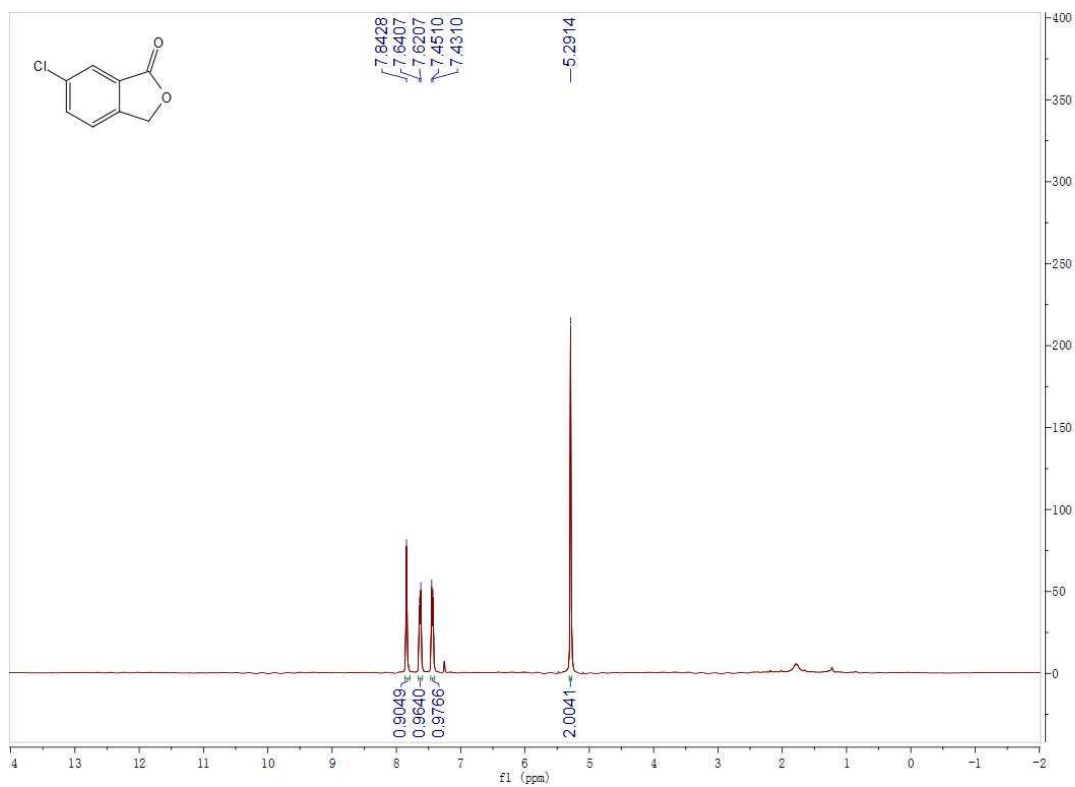

<sup>13</sup>C NMR spectrum (100 MHz, CDCl<sub>3</sub>) of compound **3n**

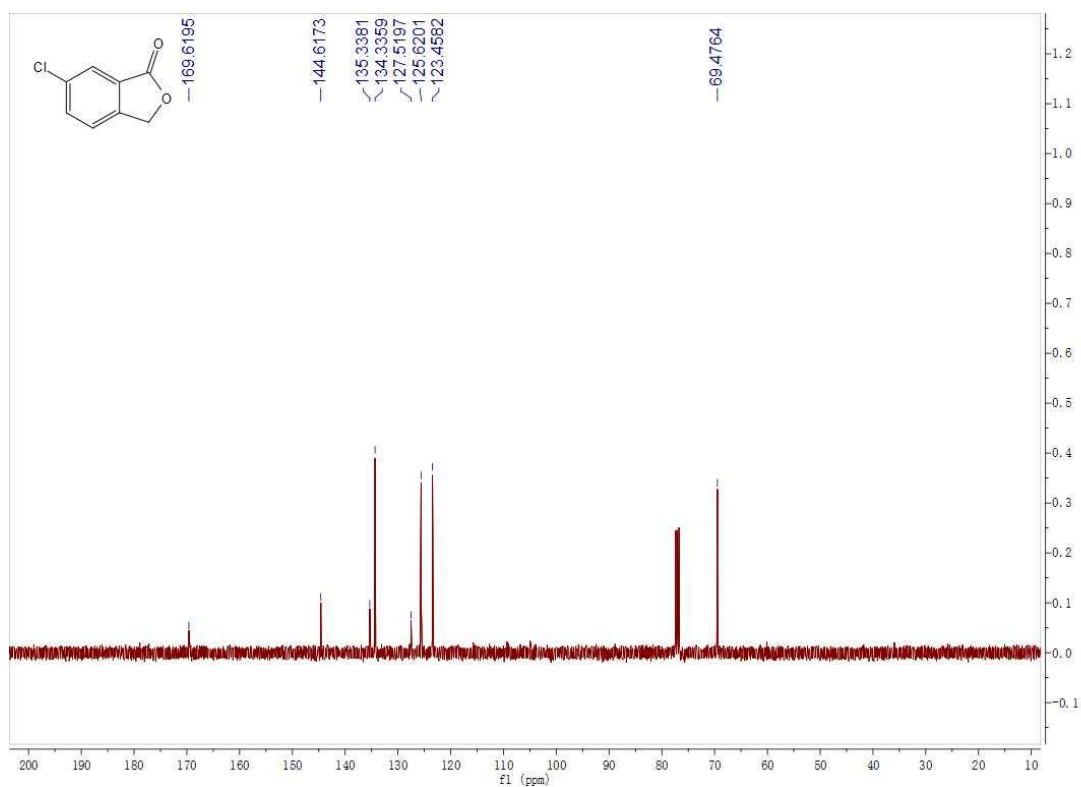

<sup>1</sup>H NMR spectrum (400 MHz, CDCl<sub>3</sub>) of compound **3o**

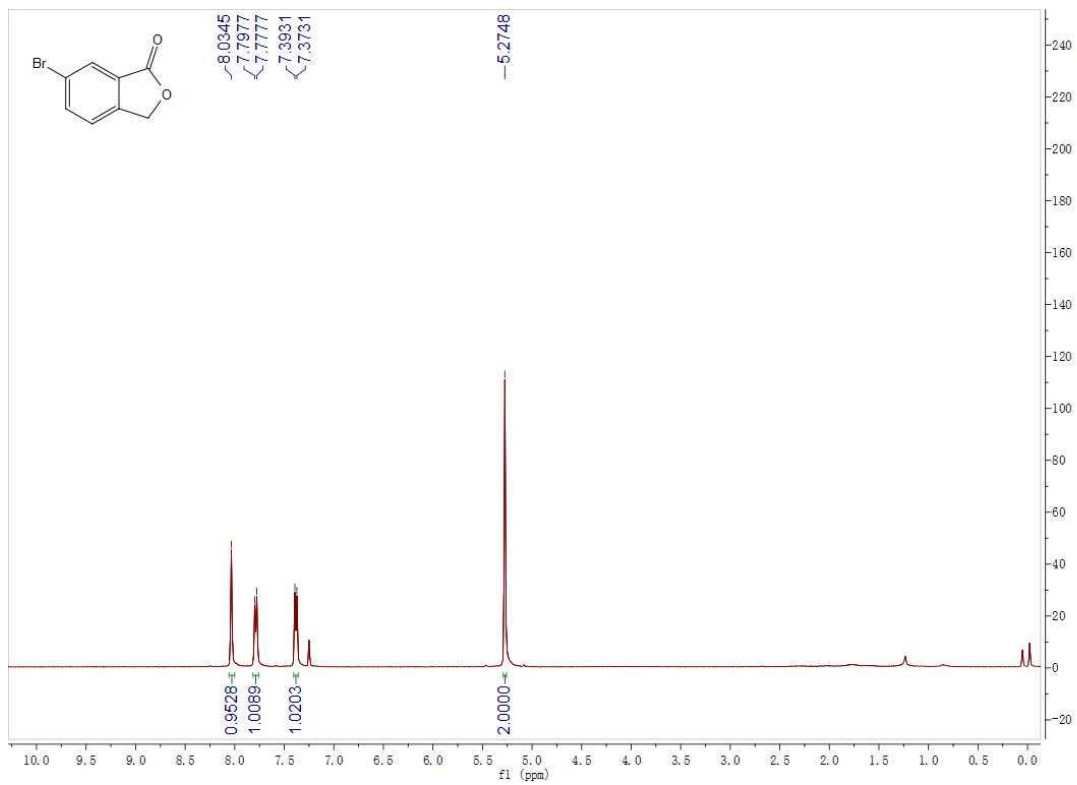

<sup>13</sup>C NMR spectrum (100 MHz, CDCl<sub>3</sub>) of compound **3o**

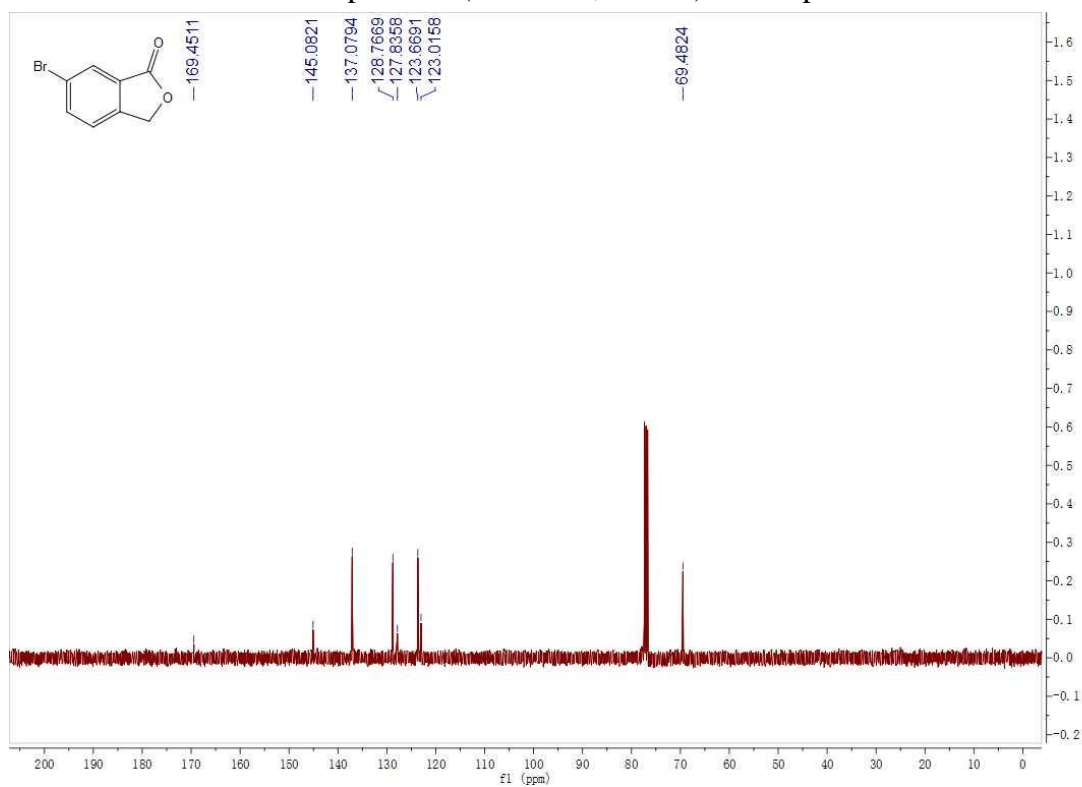

<sup>1</sup>H NMR spectrum (400 MHz, CDCl<sub>3</sub>) of compound **3p**

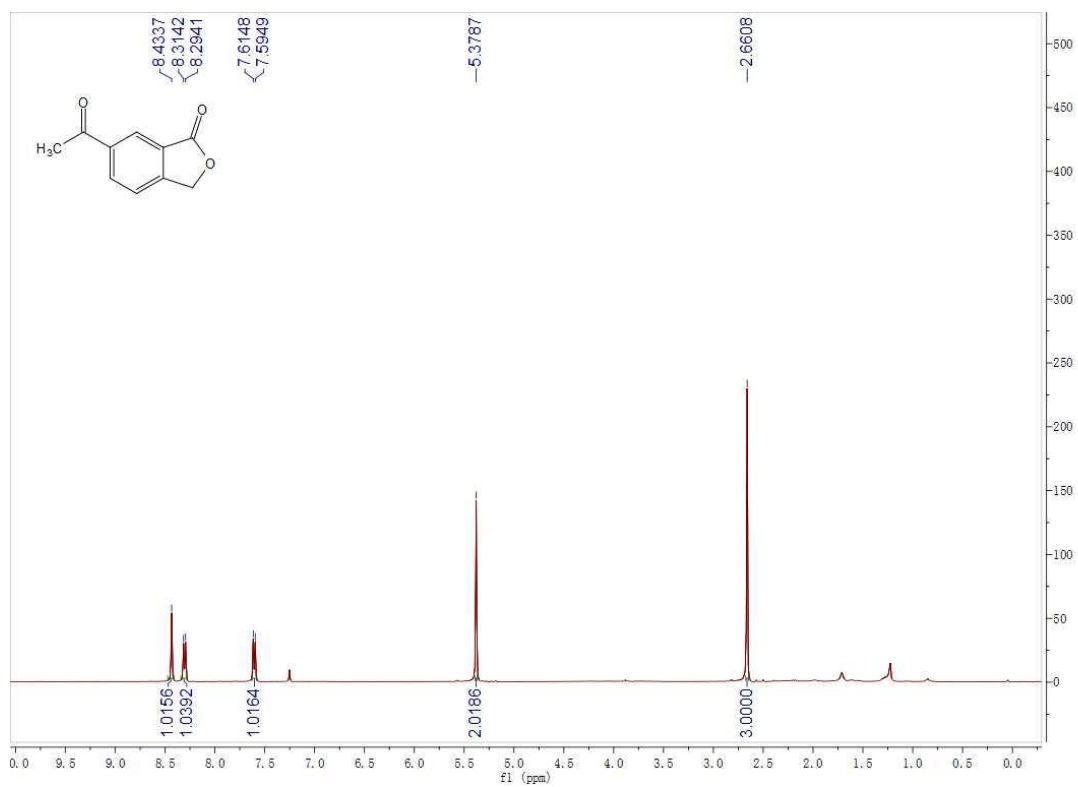

$^{13}\text{C}$  NMR spectrum (100 MHz,  $\text{CDCl}_3$ ) of compound **3p**

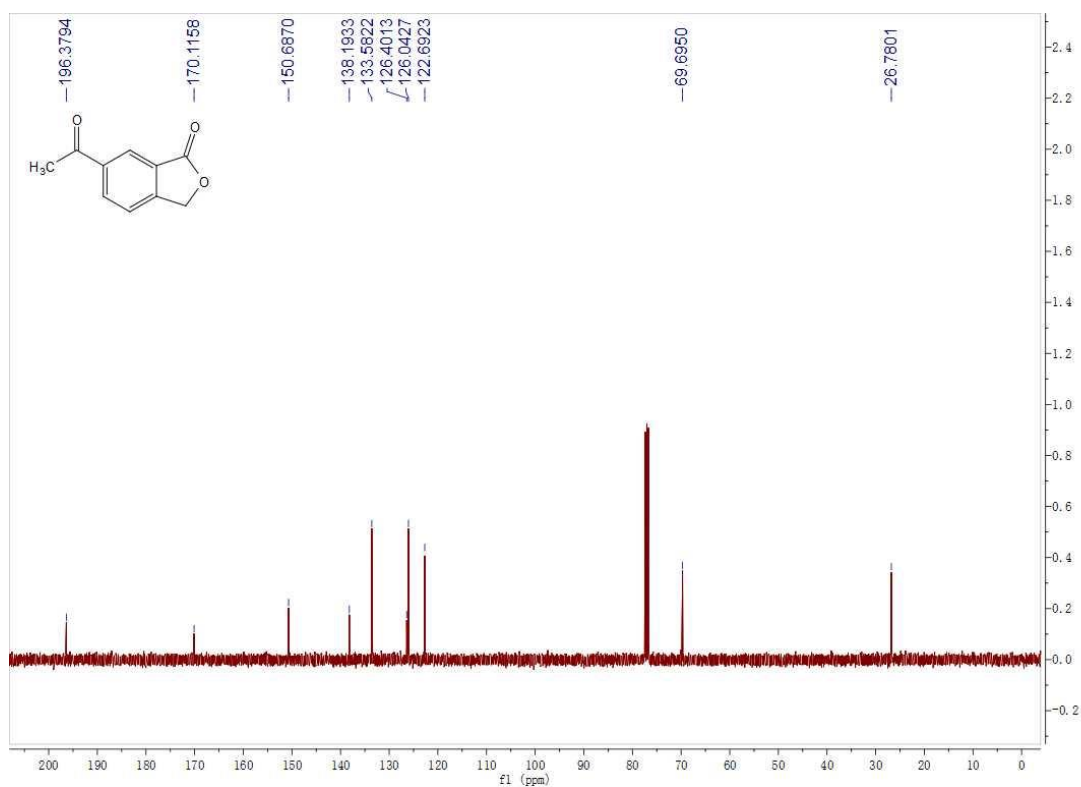

$^1\text{H}$  NMR spectrum (400 MHz,  $\text{CDCl}_3$ ) of compound **3q**

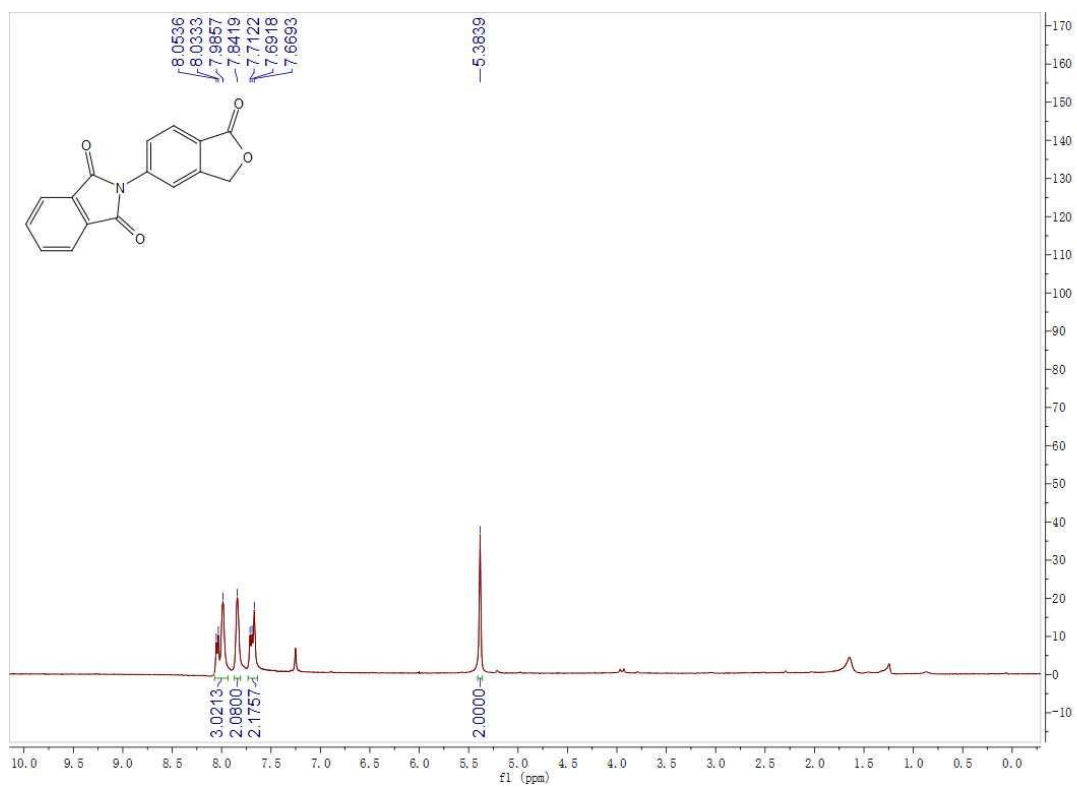

<sup>13</sup>C NMR spectrum (100 MHz, CDCl<sub>3</sub>) of compound **3q**

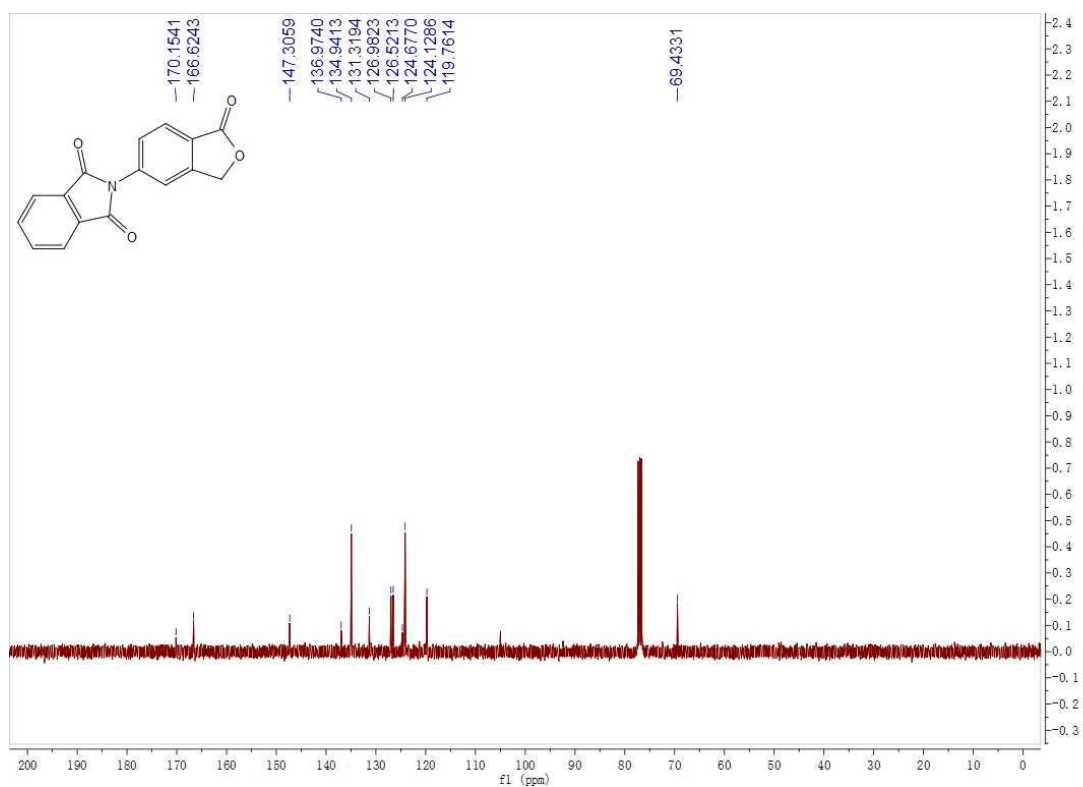

<sup>1</sup>H NMR spectrum (400 MHz, CDCl<sub>3</sub>) of compound **3r**

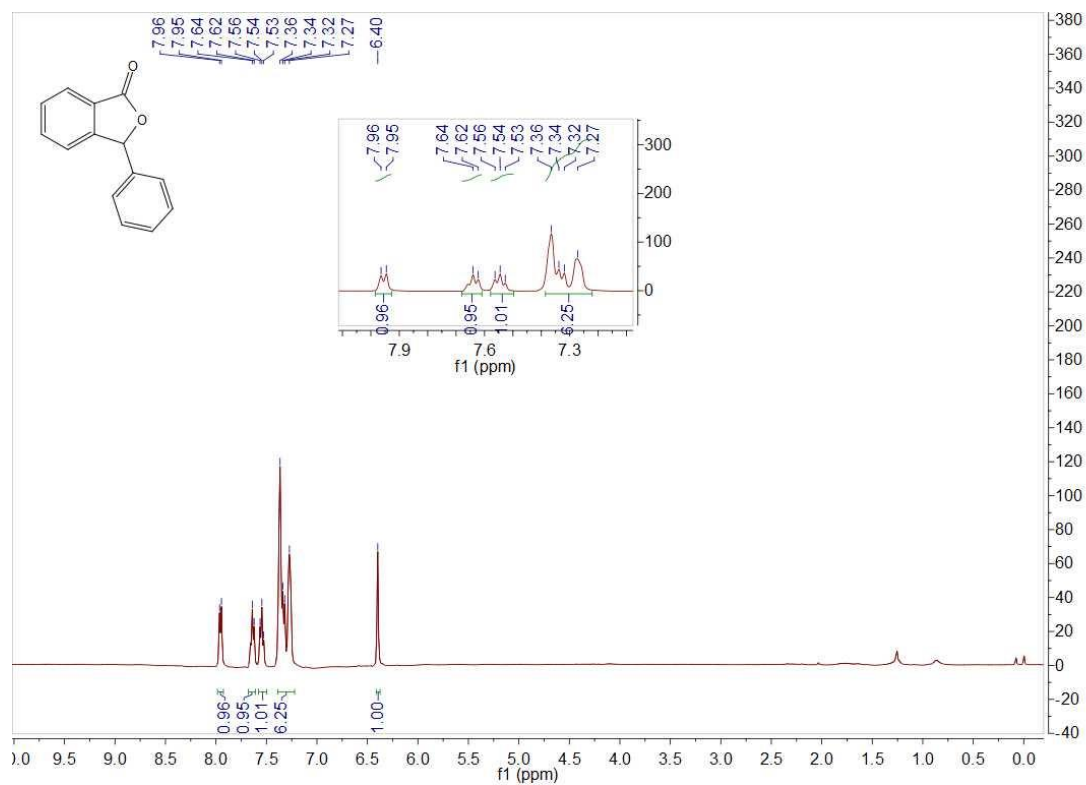

<sup>13</sup>C NMR spectrum (100 MHz, CDCl<sub>3</sub>) of compound **3r**

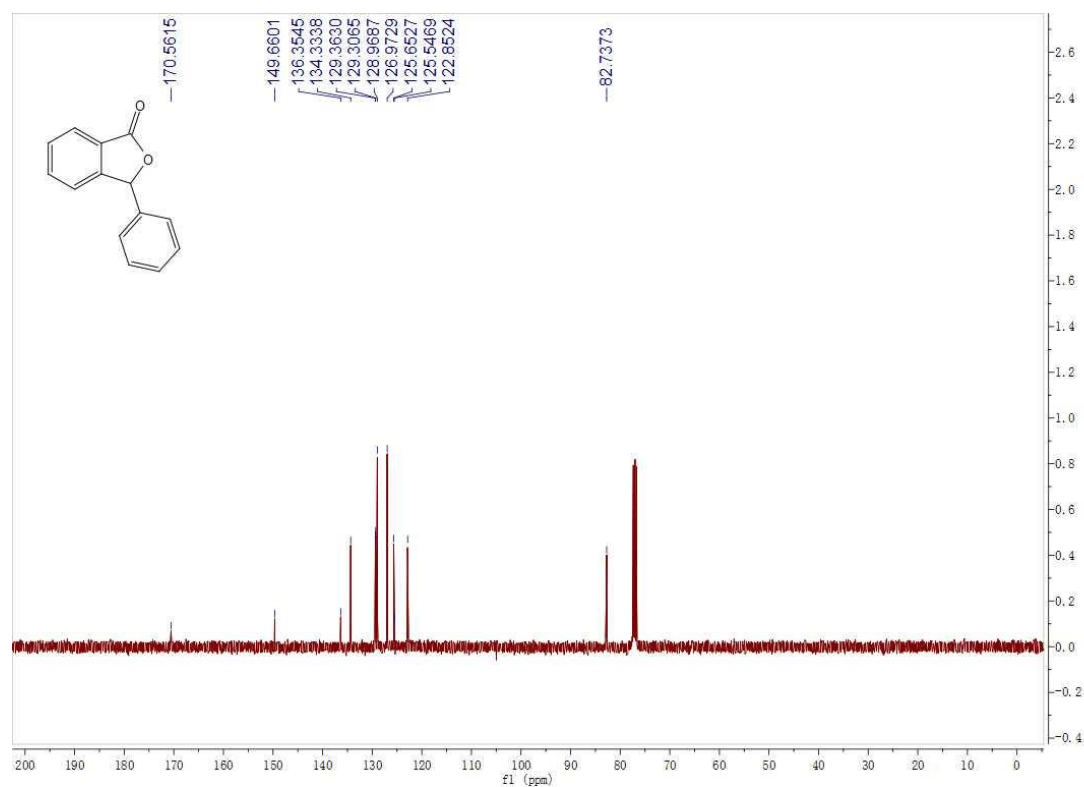

<sup>1</sup>H NMR spectrum (400 MHz, CDCl<sub>3</sub>) of compound **3s**

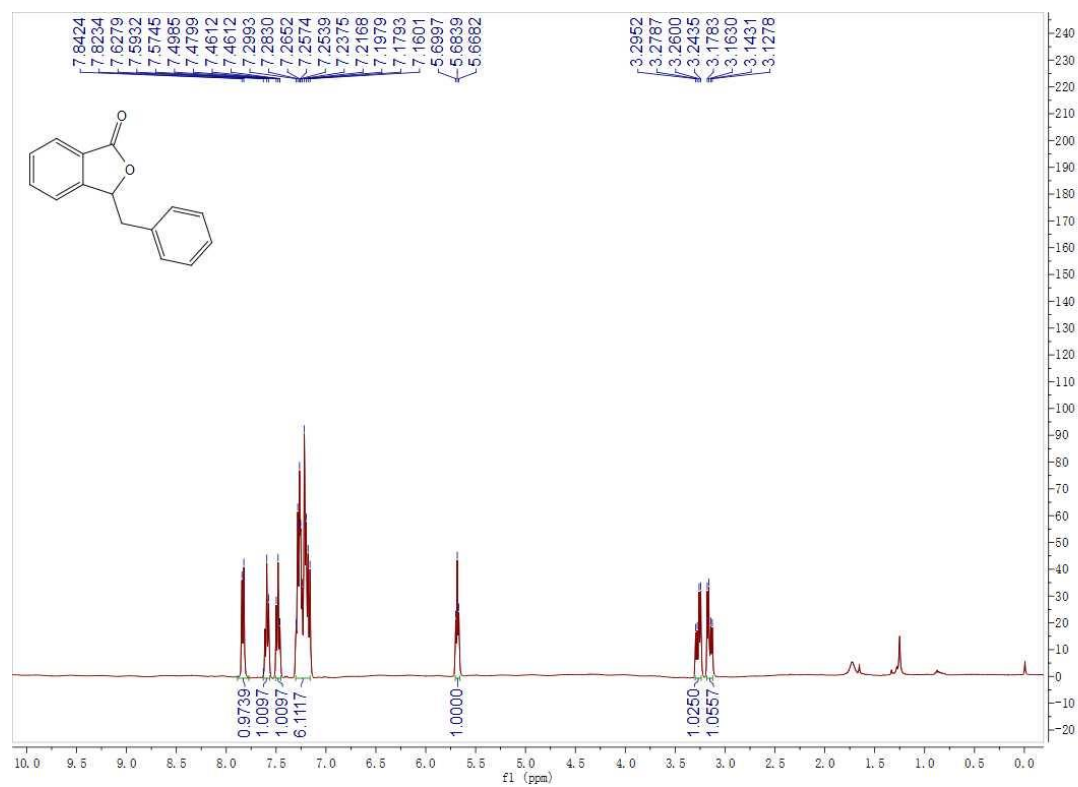

<sup>13</sup>C NMR spectrum (100 MHz, CDCl<sub>3</sub>) of compound **3s**

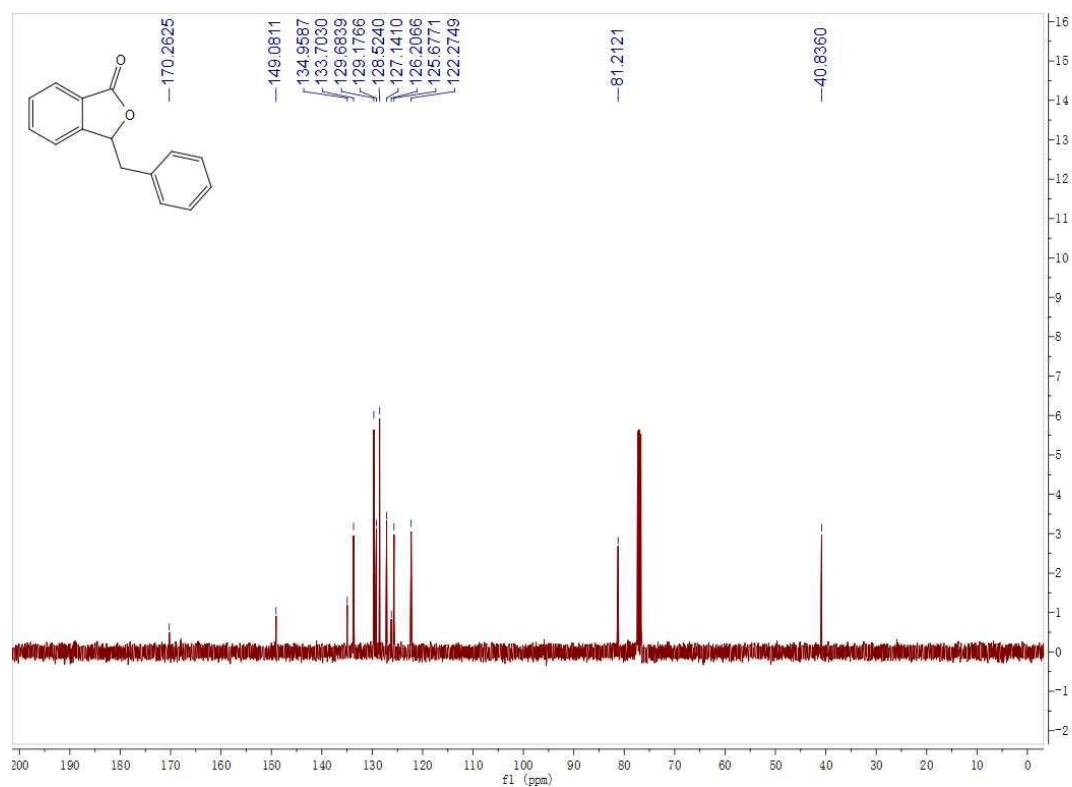

<sup>1</sup>H NMR spectrum (400 MHz, CDCl<sub>3</sub>) of compound **3t**

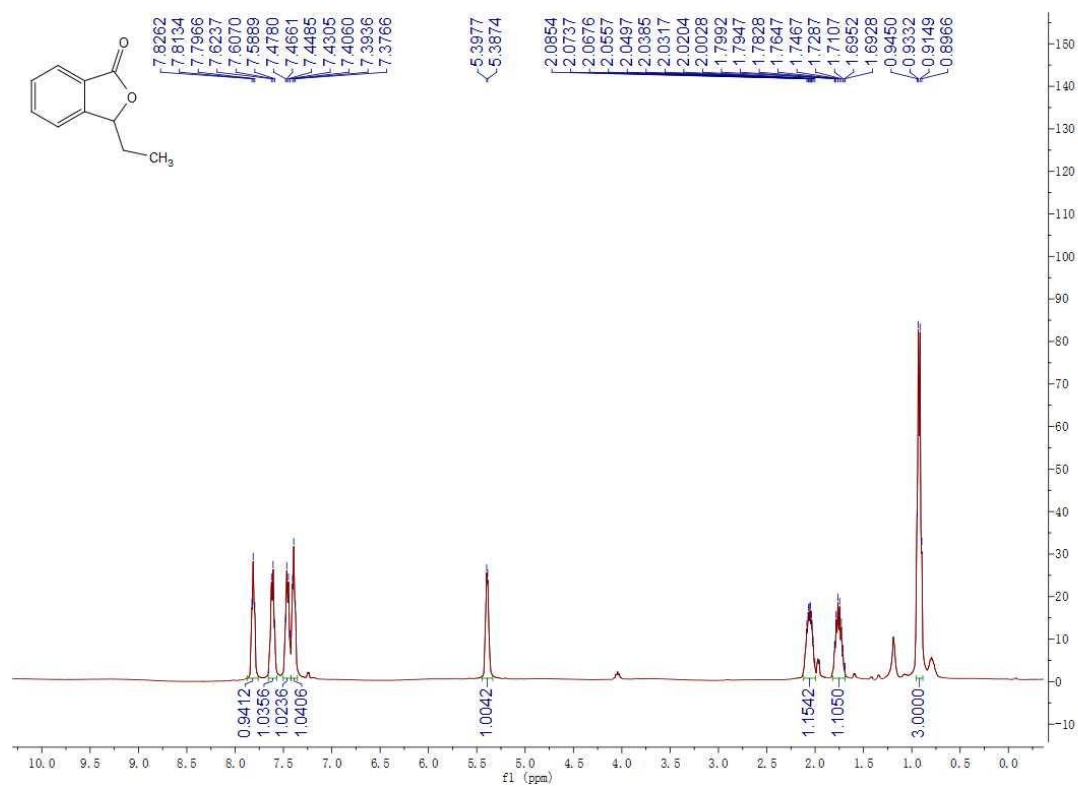

<sup>13</sup>C NMR spectrum (100 MHz, CDCl<sub>3</sub>) of compound **3t**

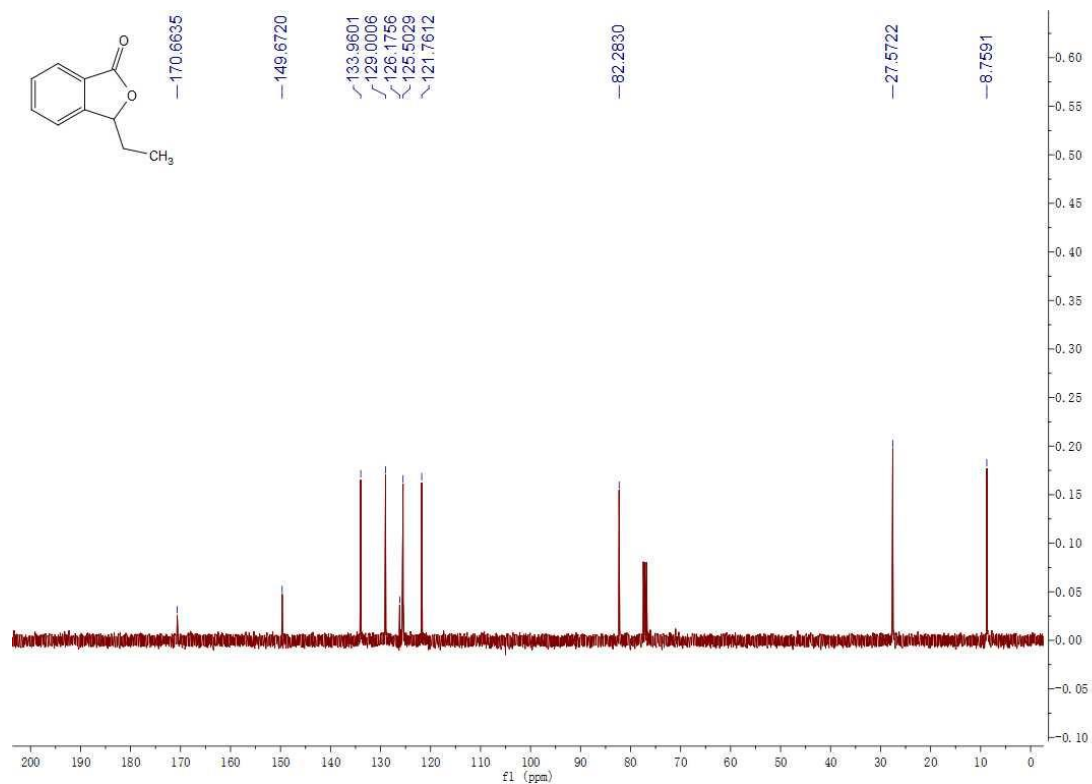

<sup>1</sup>H NMR spectrum (400 MHz, CDCl<sub>3</sub>) of compound **3u**

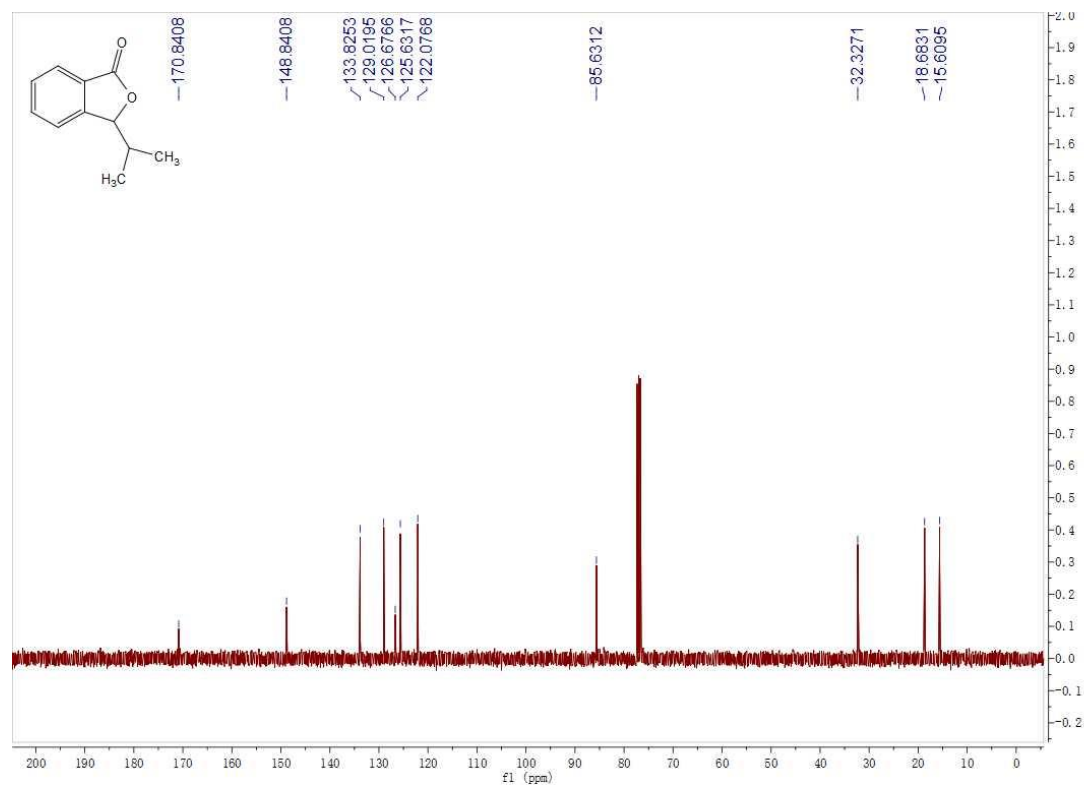



<sup>13</sup>C NMR spectrum (100 MHz, CDCl<sub>3</sub>) of compound **3u**

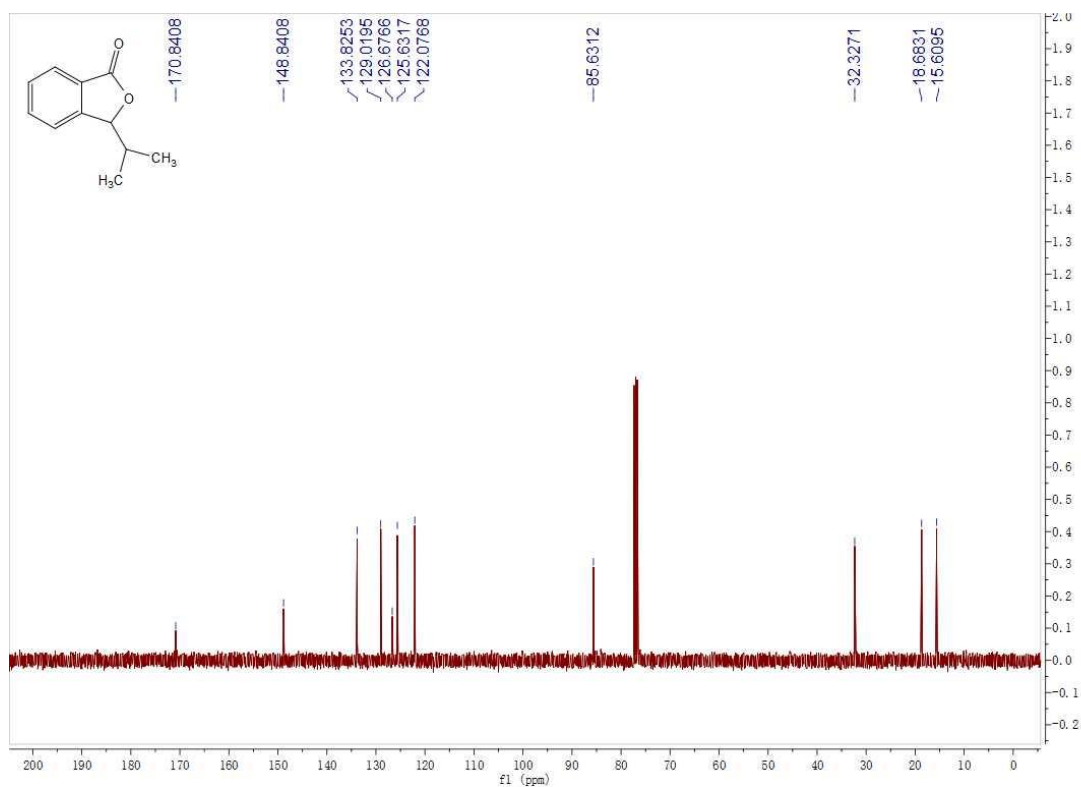

<sup>1</sup>H NMR spectrum (400 MHz, CDCl<sub>3</sub>) of compound **3v**

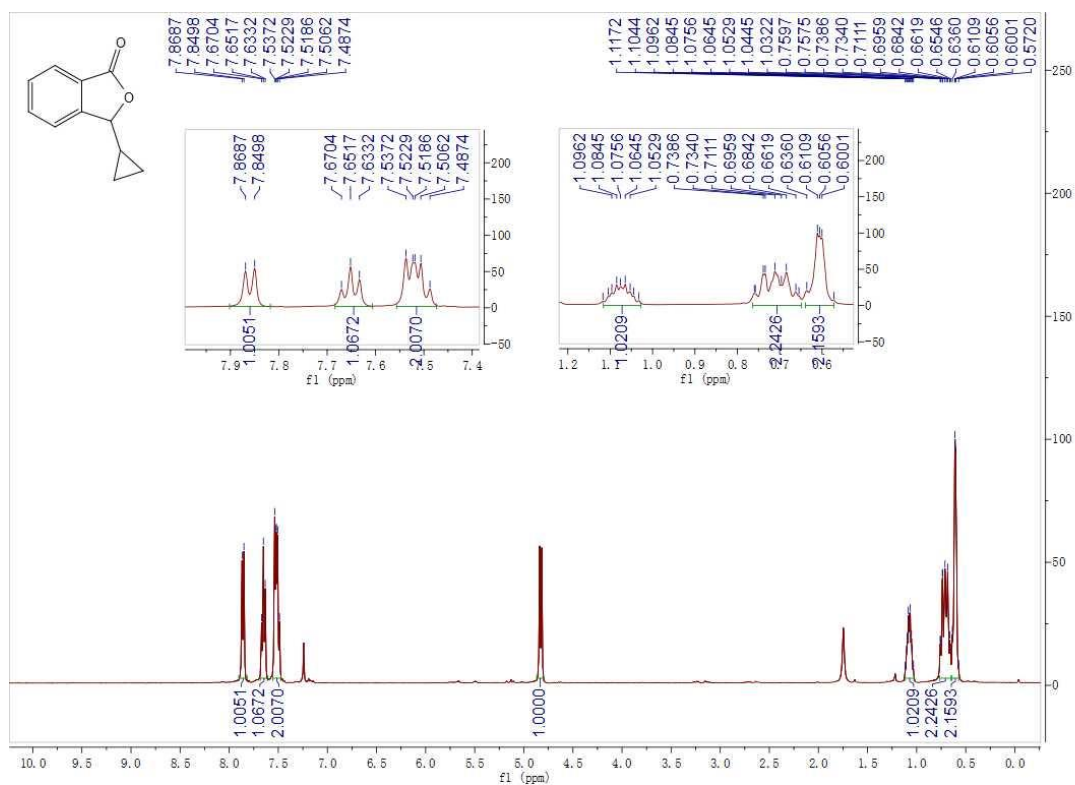

<sup>13</sup>C NMR spectrum (100 MHz, CDCl<sub>3</sub>) of compound **3v**

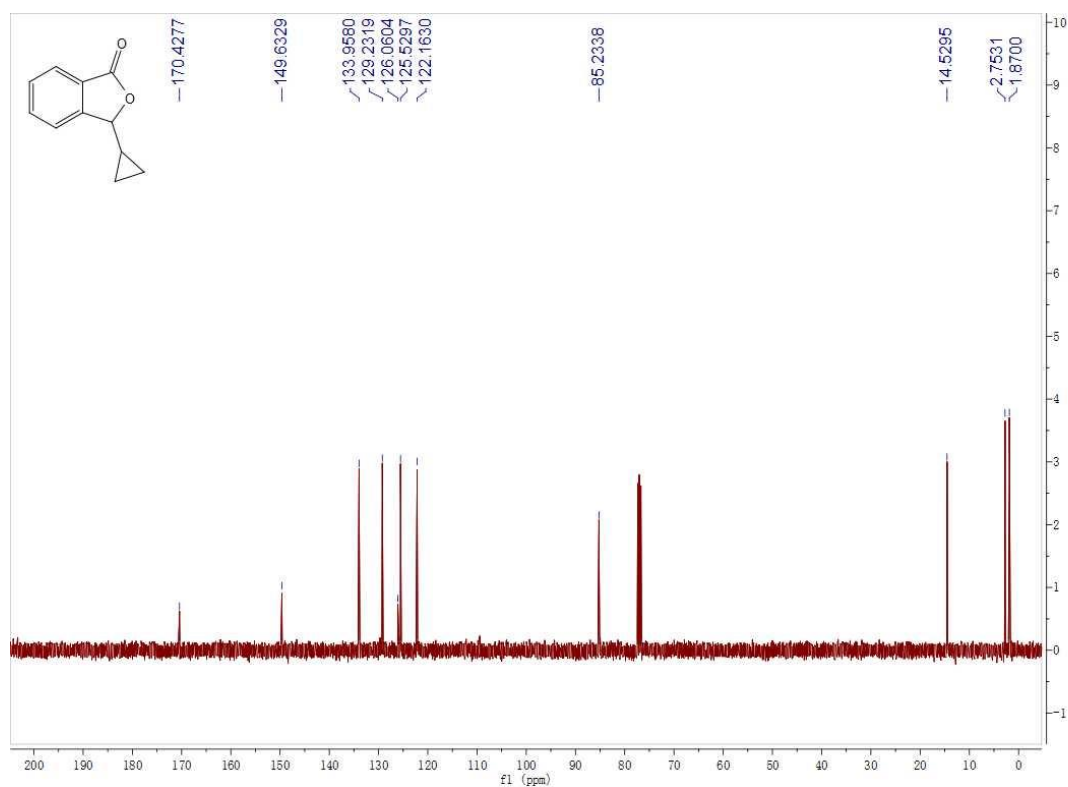

<sup>1</sup>H NMR spectrum (400 MHz, CDCl<sub>3</sub>) of compound **3w**

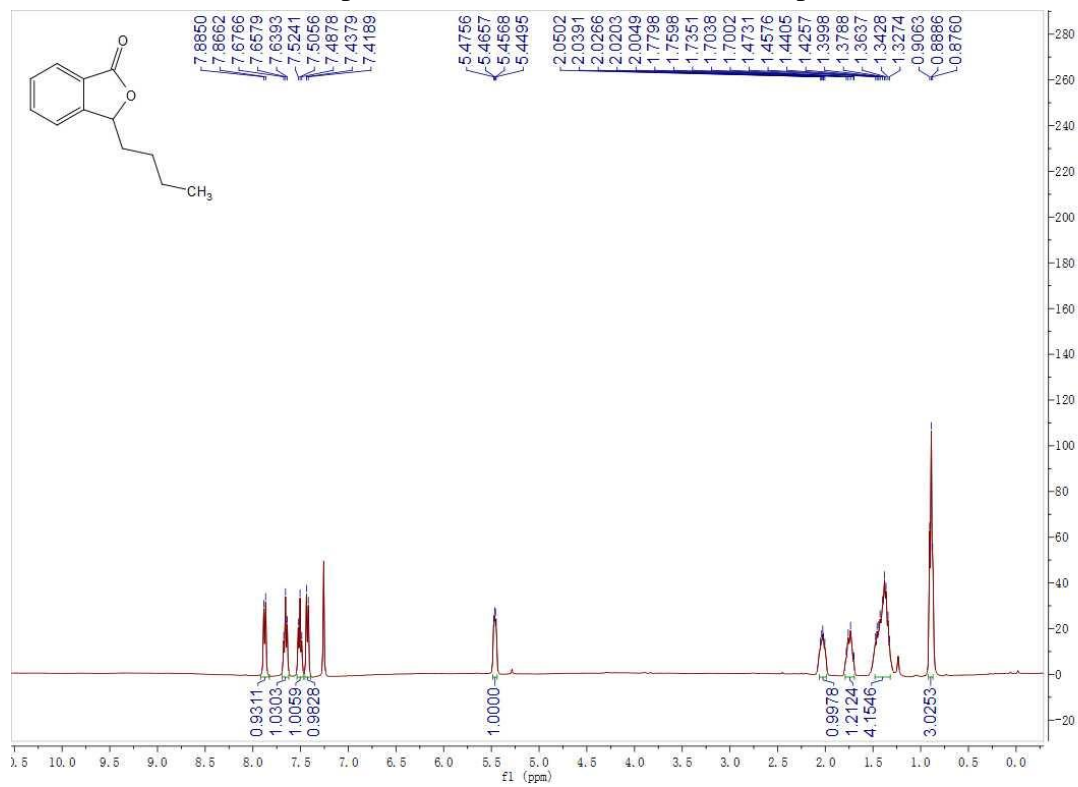

<sup>13</sup>C NMR spectrum (100 MHz, CDCl<sub>3</sub>) of compound **3w**

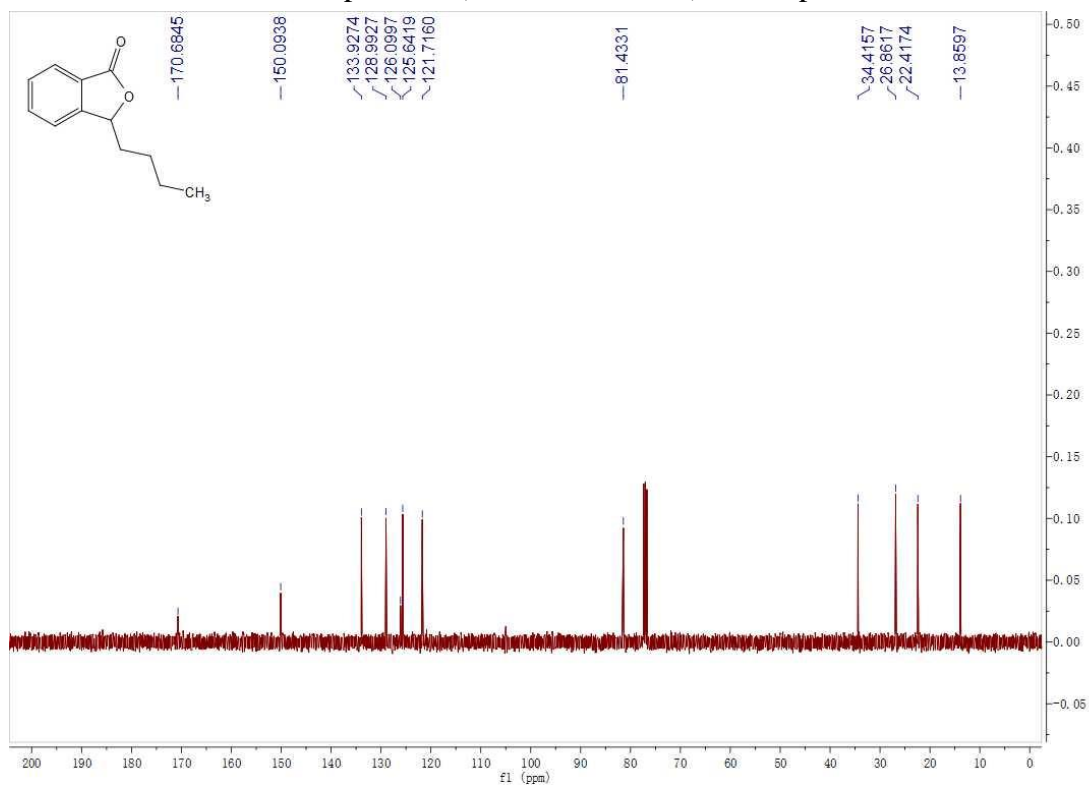

<sup>1</sup>H NMR spectrum (400 MHz, CDCl<sub>3</sub>) of compound **3x**

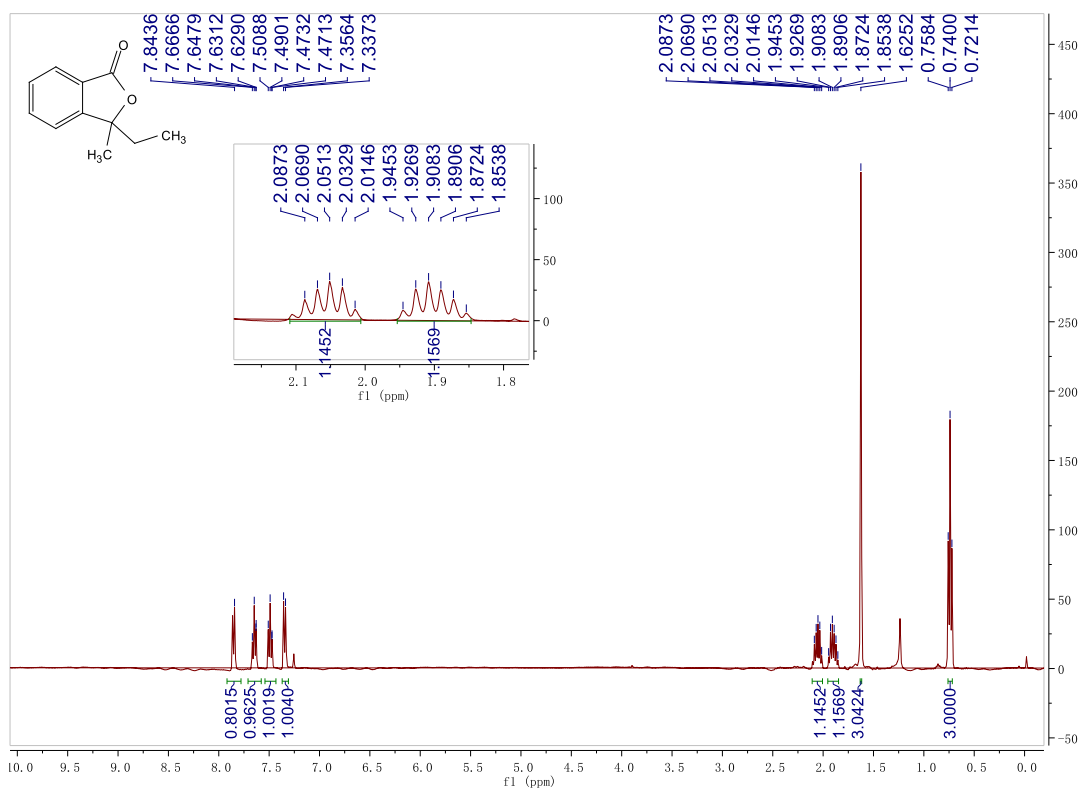

<sup>13</sup>C NMR spectrum (100 MHz, CDCl<sub>3</sub>) of compound **3x**

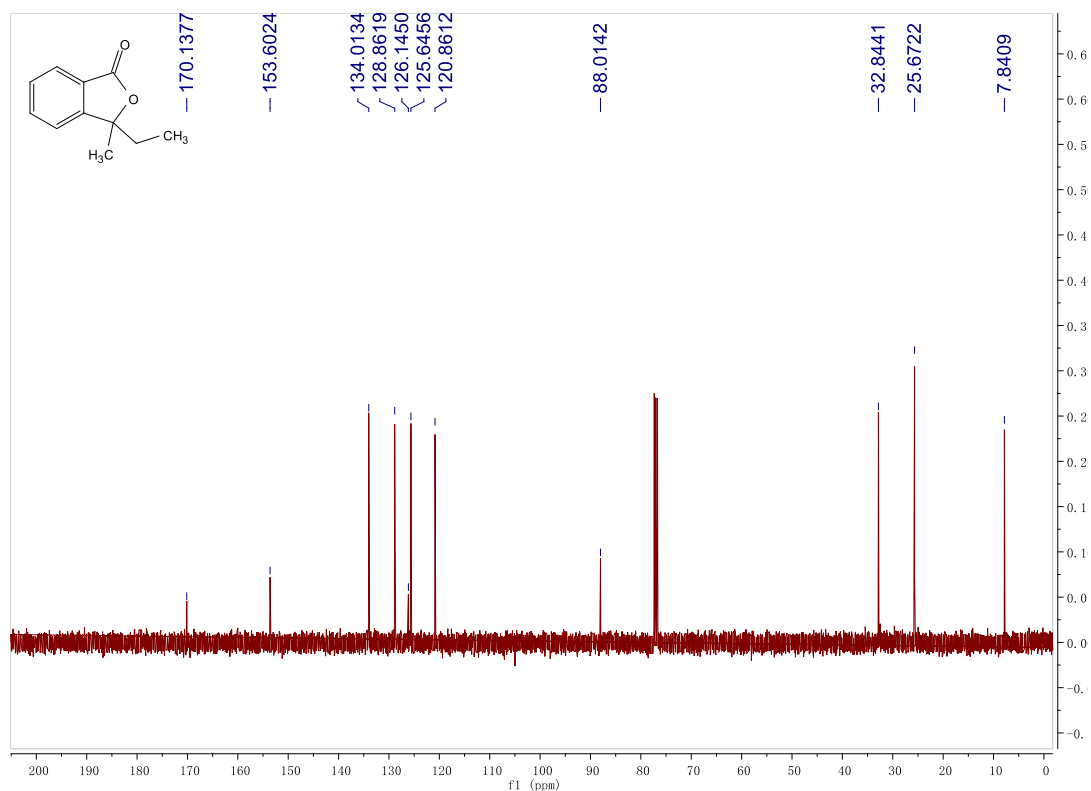

<sup>1</sup>H NMR spectrum (400 MHz, CDCl<sub>3</sub>) of compound **5a**

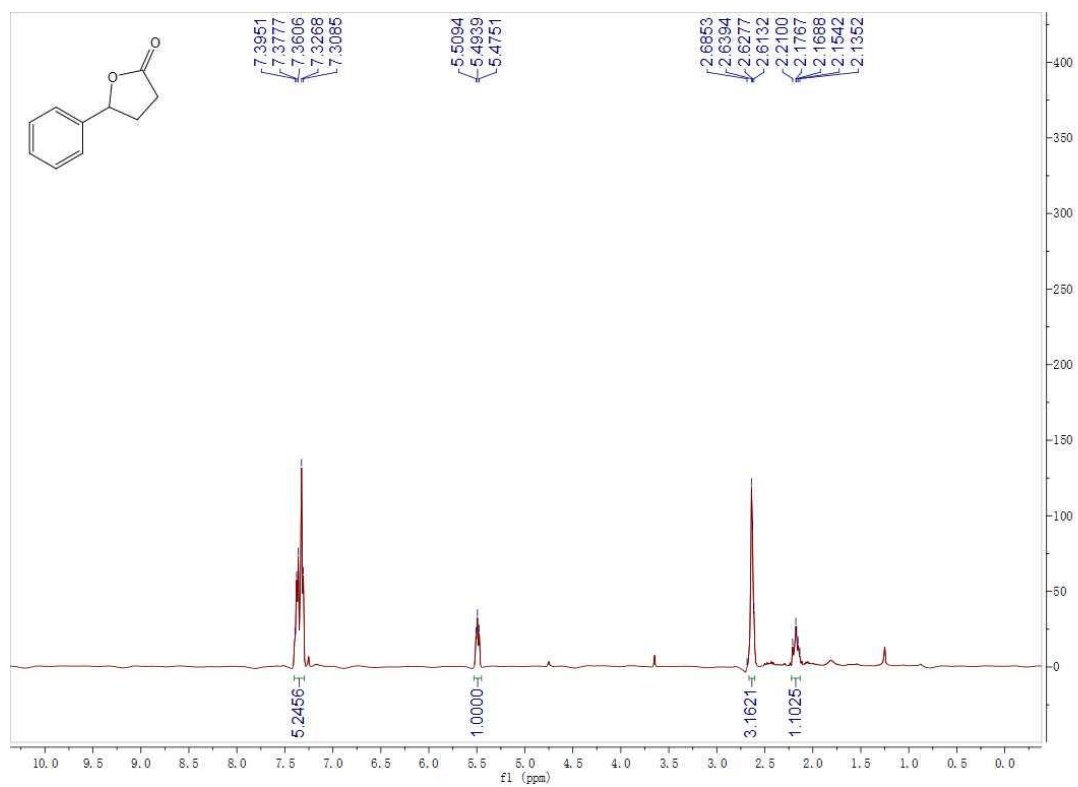

$^{13}\text{C}$  NMR spectrum (100 MHz,  $\text{CDCl}_3$ ) of compound **5a**

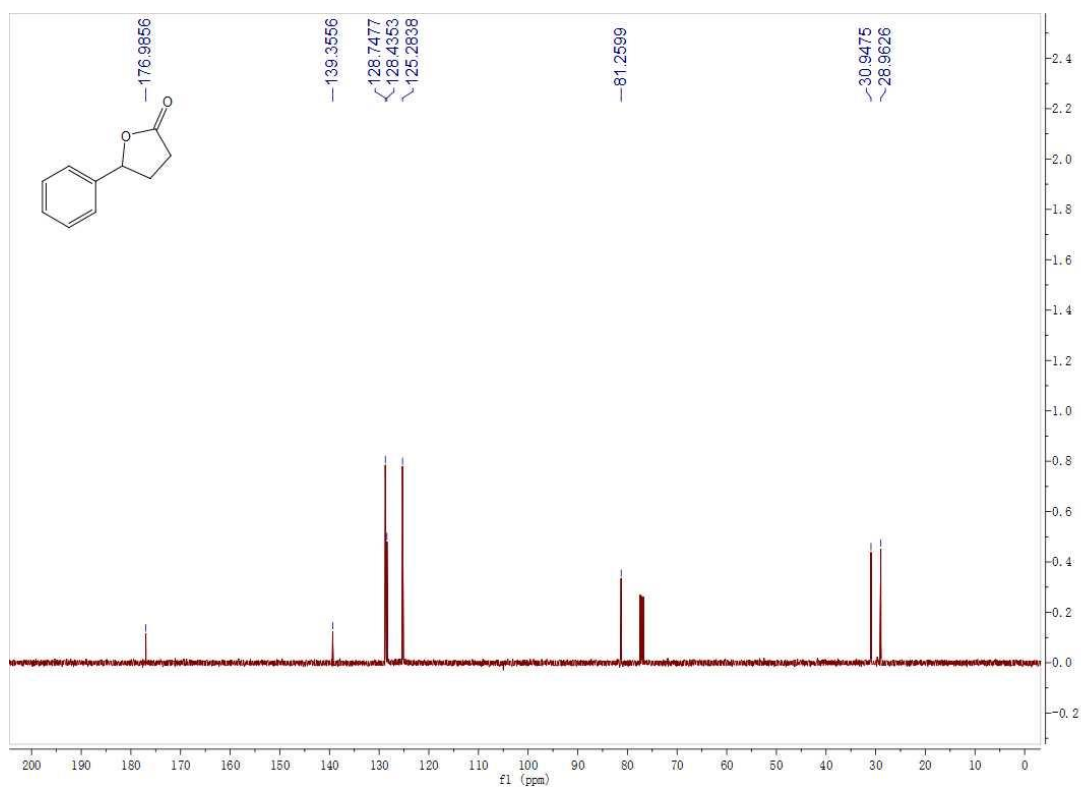

$^1\text{H}$  NMR spectrum (400 MHz,  $\text{CDCl}_3$ ) of compound **5b**

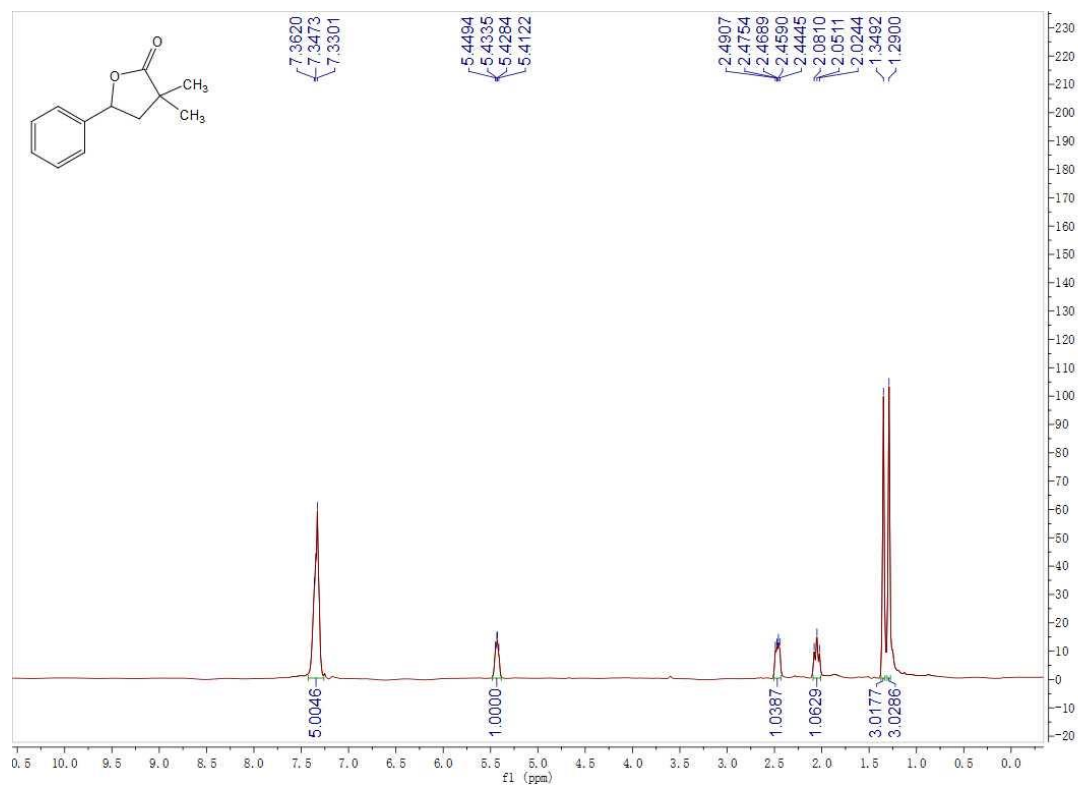

$^{13}\text{C}$  NMR spectrum (100 MHz,  $\text{CDCl}_3$ ) of compound **5b**

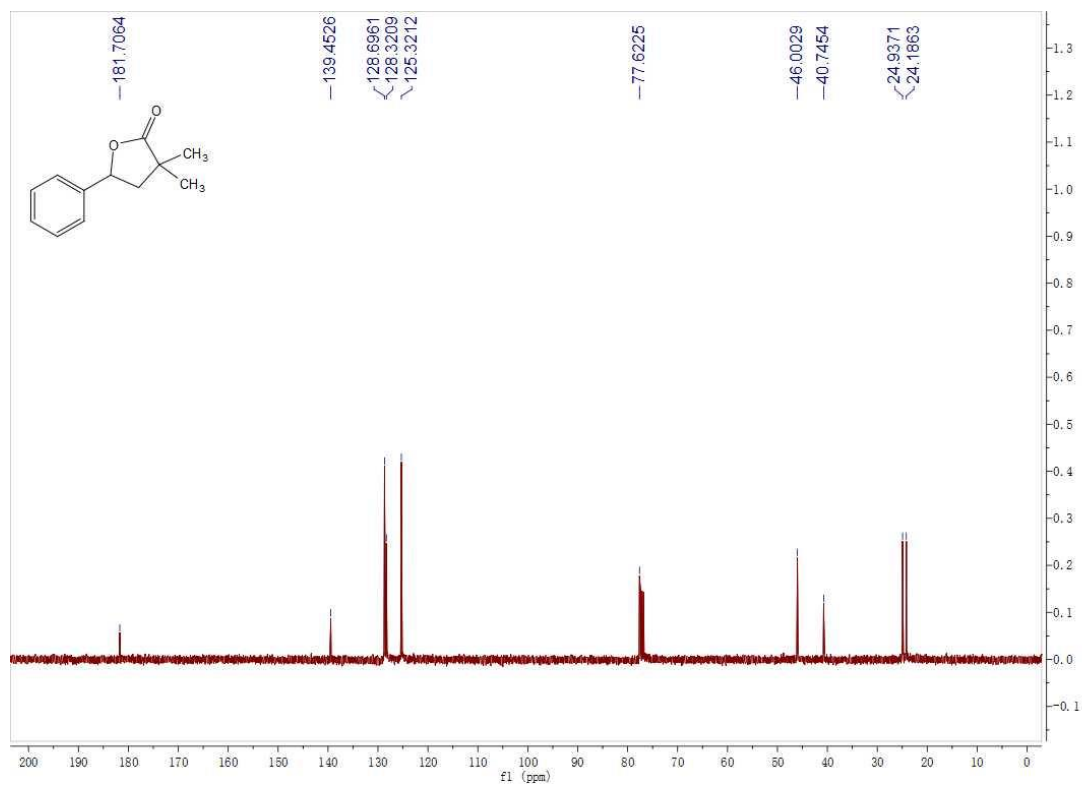

$^1\text{H}$  NMR spectrum (400 MHz,  $\text{CDCl}_3$ ) of compound **5c**

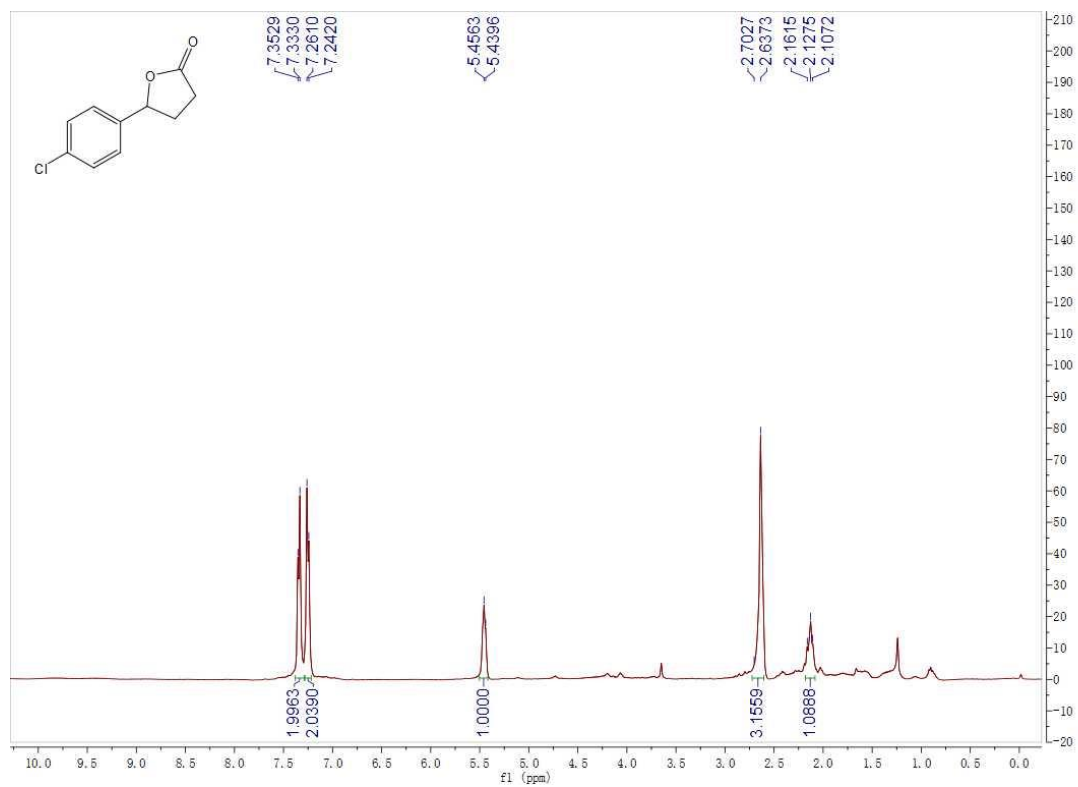

$^{13}\text{C}$  NMR spectrum (100 MHz,  $\text{CDCl}_3$ ) of compound **5c**

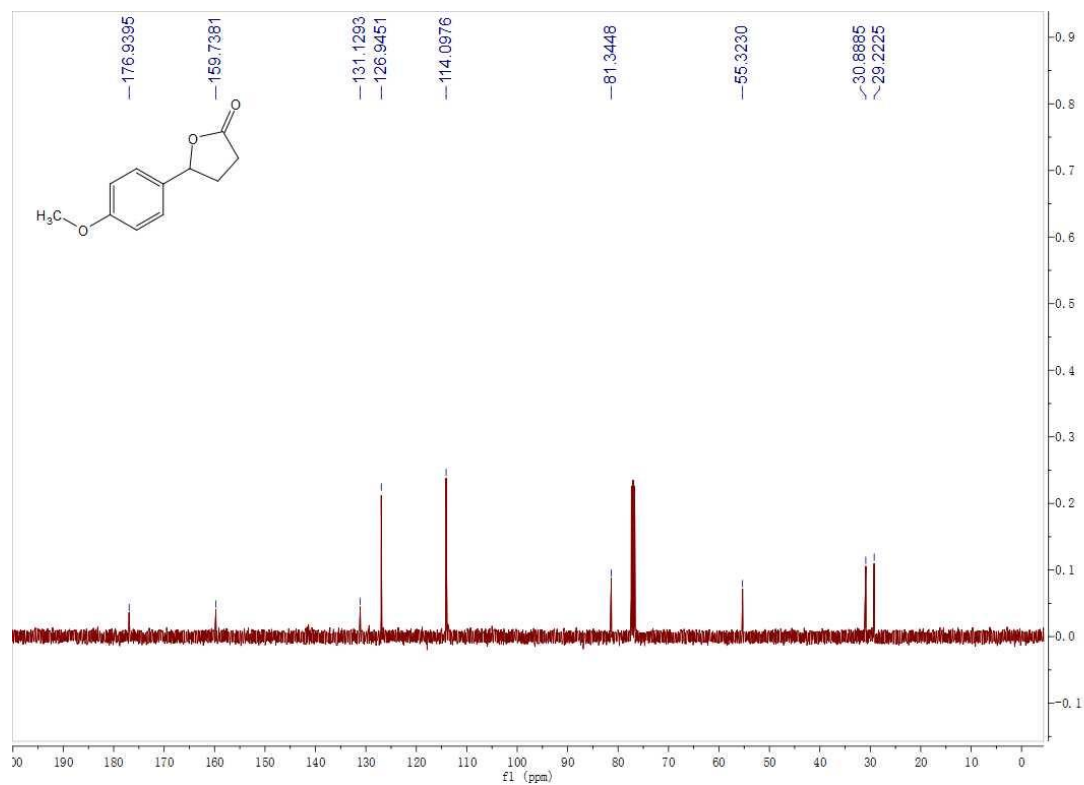

$^1\text{H}$  NMR spectrum (400 MHz,  $\text{CDCl}_3$ ) of compound **5d**

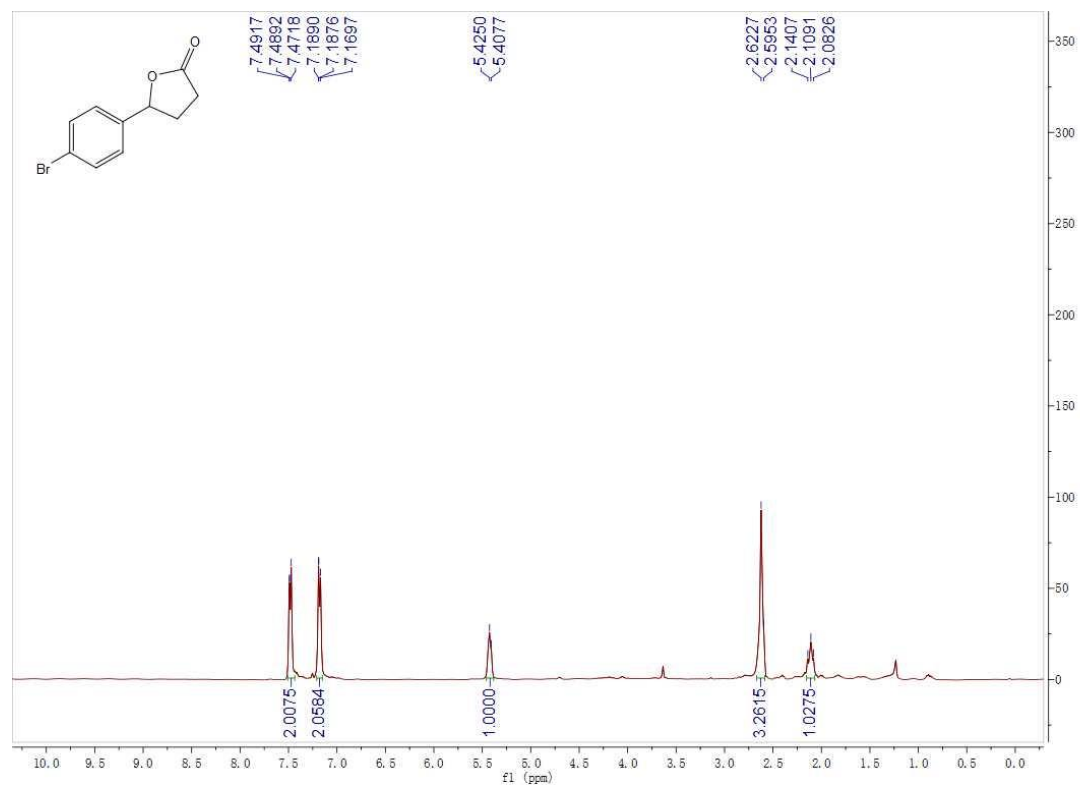

$^{13}\text{C}$  NMR spectrum (100 MHz,  $\text{CDCl}_3$ ) of compound **5d**

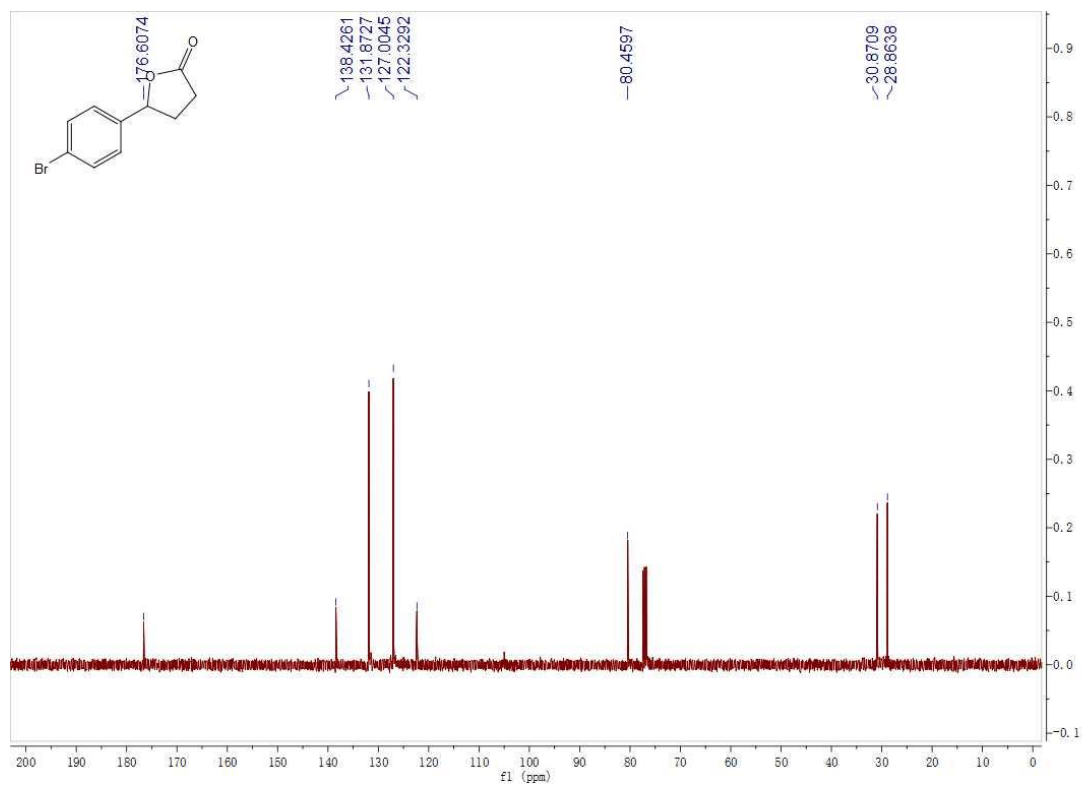

$^1\text{H}$  NMR spectrum (400 MHz,  $\text{CDCl}_3$ ) of compound **5e**





<sup>13</sup>C NMR spectrum (100 MHz, CDCl<sub>3</sub>) of compound **5e**

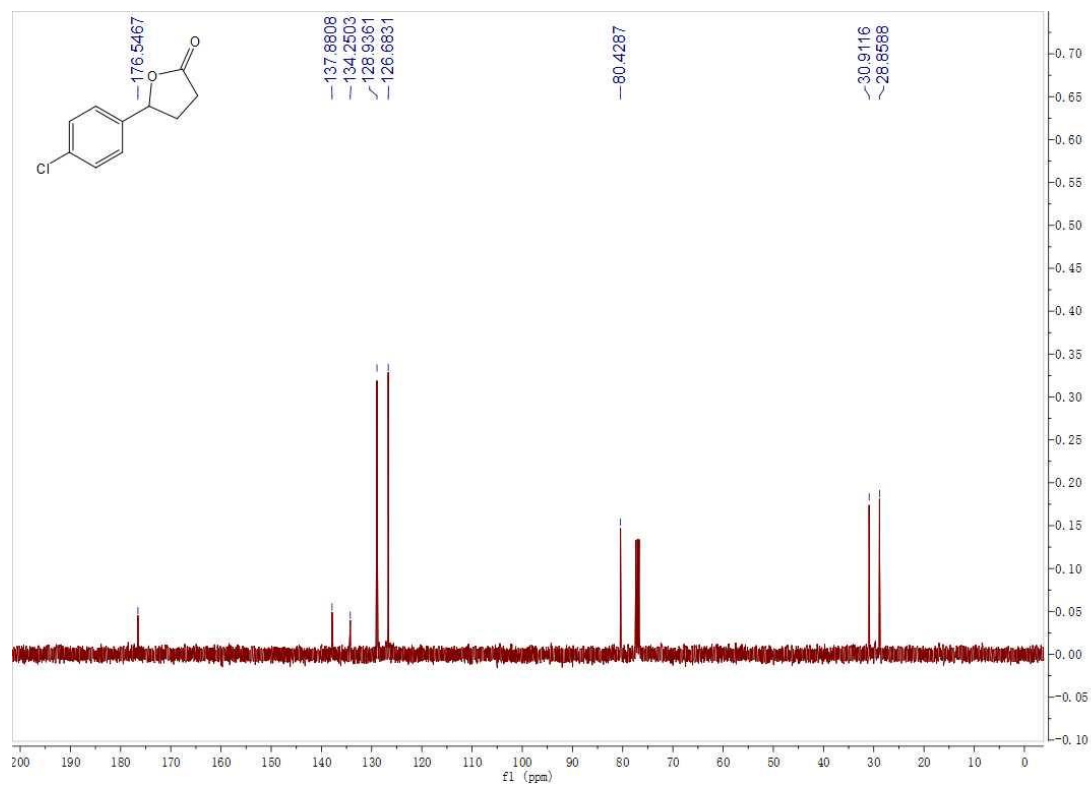

<sup>1</sup>H NMR spectrum (400 MHz, CDCl<sub>3</sub>) of compound **5f**

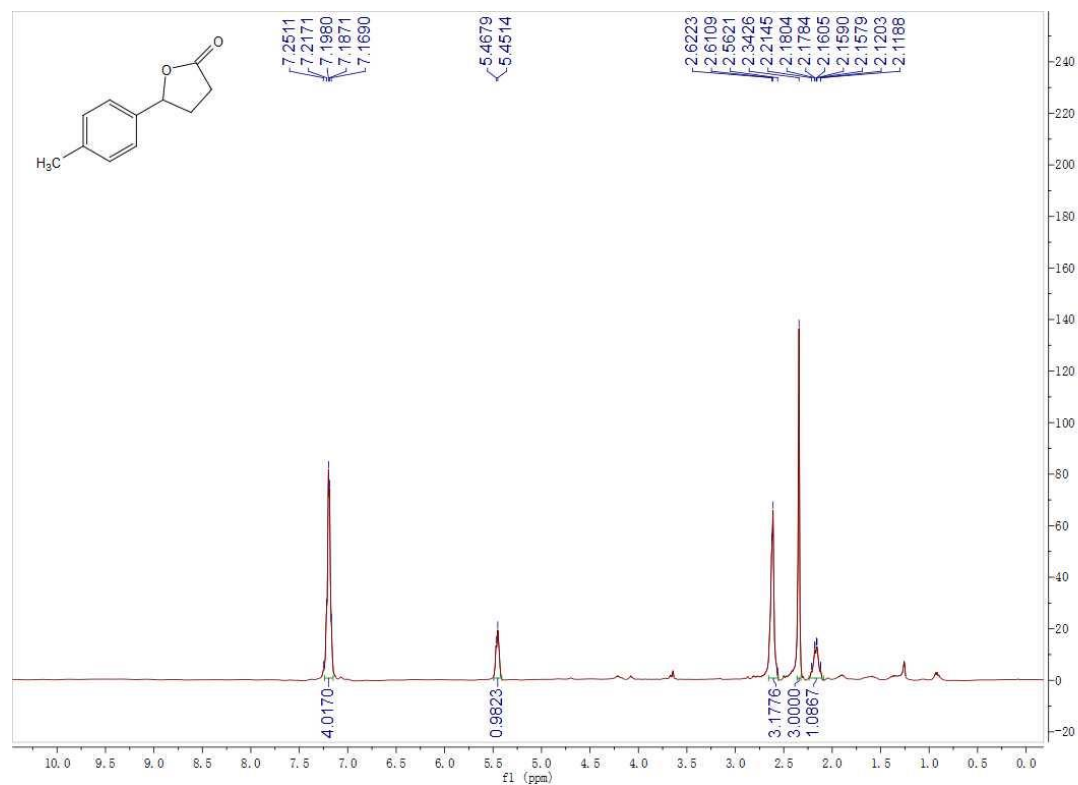

<sup>13</sup>C NMR spectrum (100 MHz, CDCl<sub>3</sub>) of compound **5f**

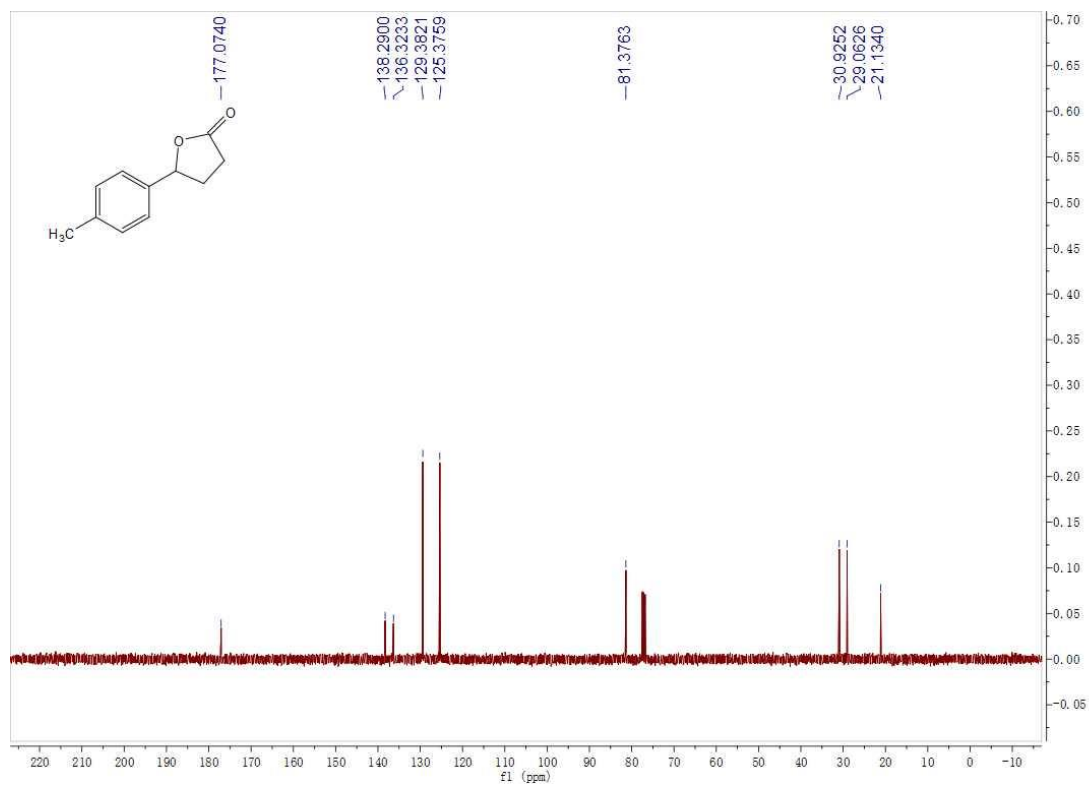

<sup>1</sup>H NMR spectrum (400 MHz, CDCl<sub>3</sub>) of compound **10**

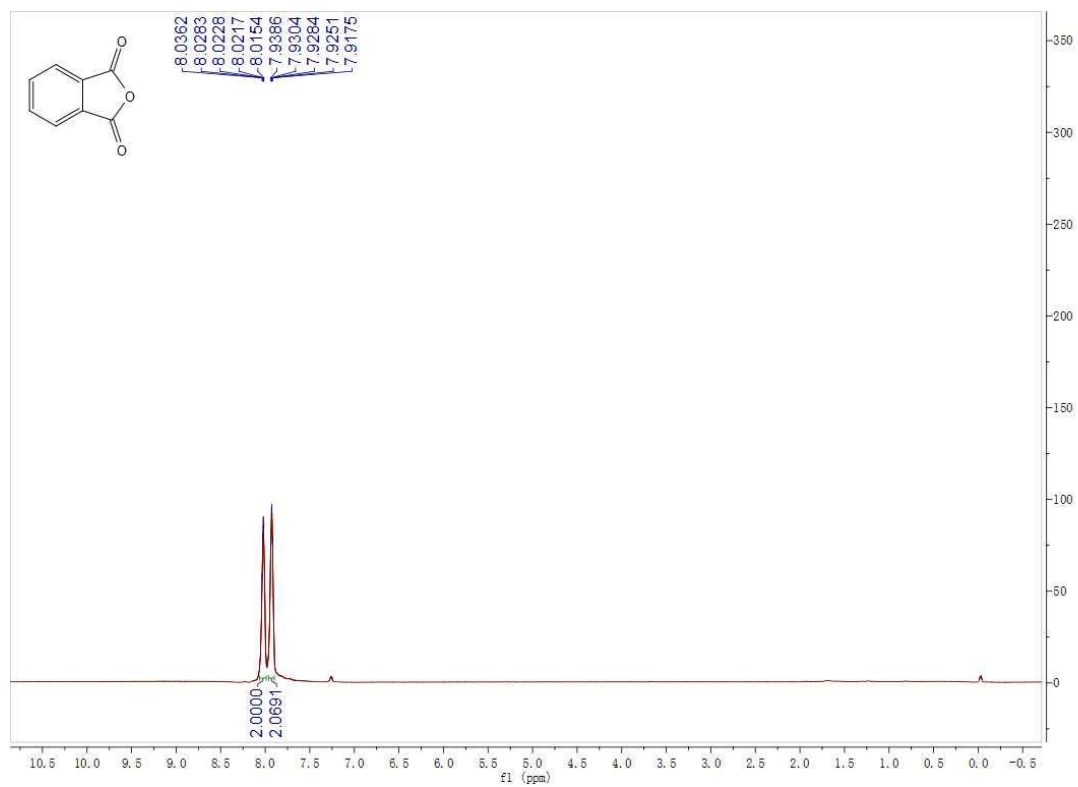

$^{13}\text{C}$  NMR spectrum (100 MHz,  $\text{CDCl}_3$ ) of compound **10**

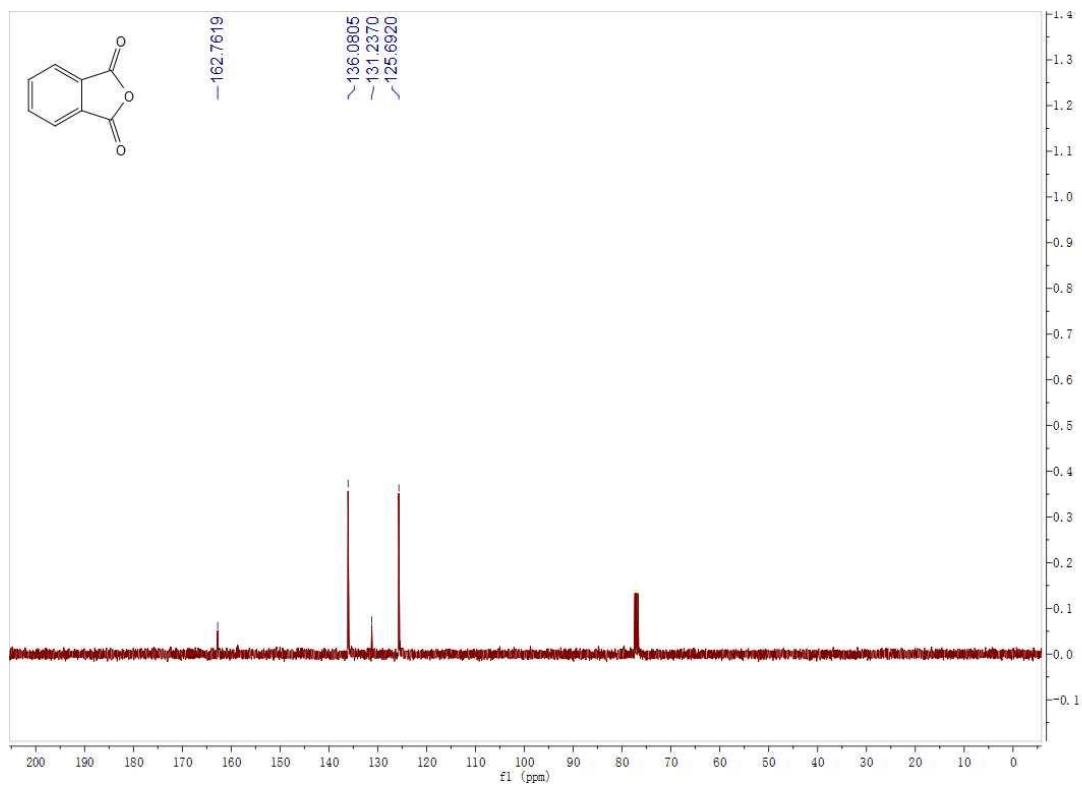

$^1\text{H}$  NMR spectrum (400 MHz,  $\text{CD}_3\text{OD}$ ) of compound **11**

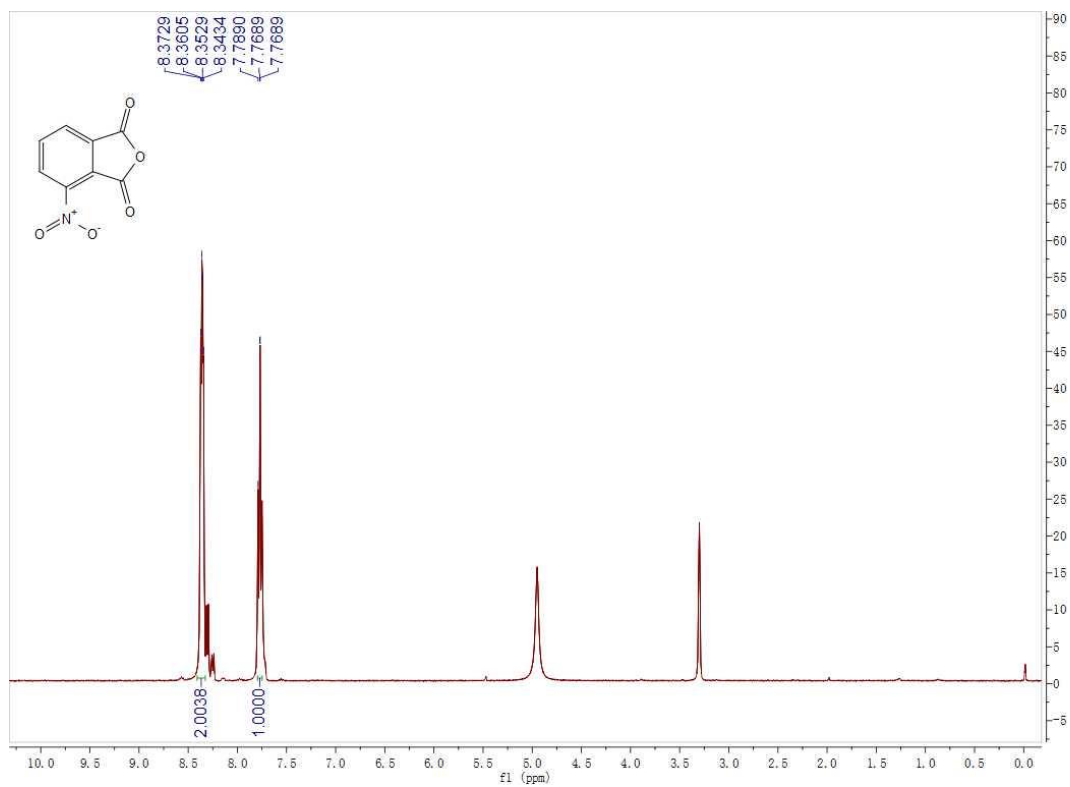

$^{13}\text{C}$  NMR spectrum (100 MHz,  $\text{CD}_3\text{OD}$ ) of compound **11**

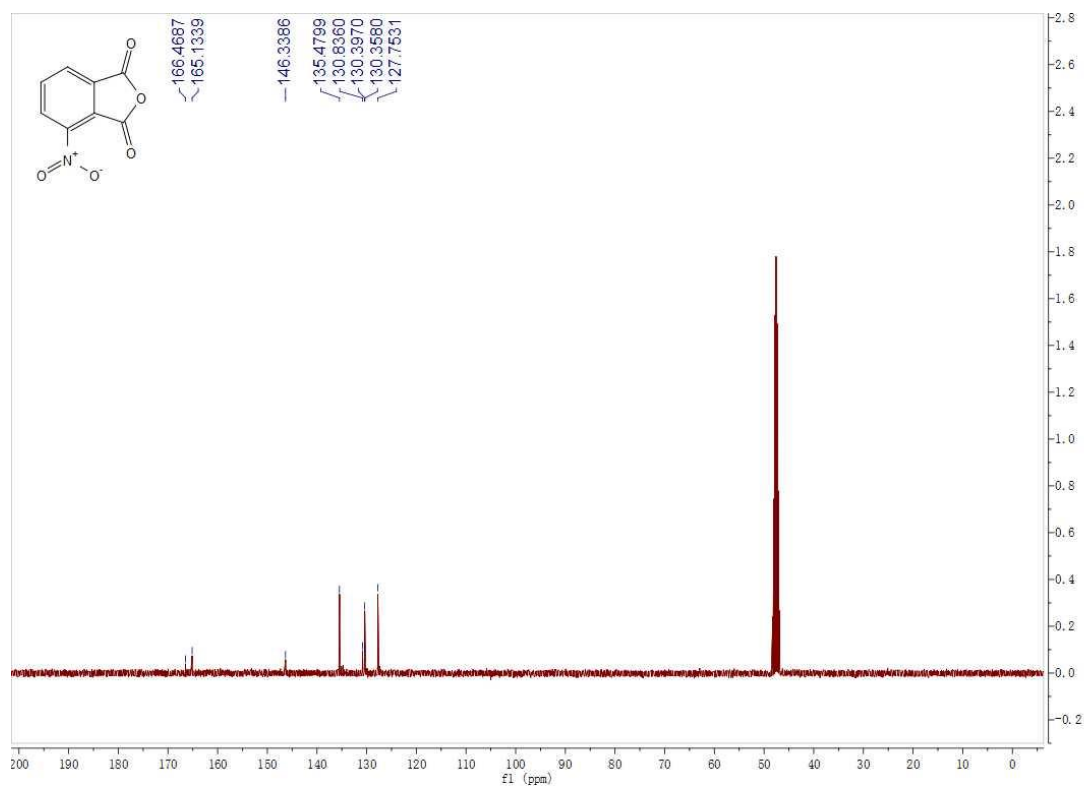

$^1\text{H}$  NMR spectrum (400 MHz, DMSO) of compound **Thalidomide**

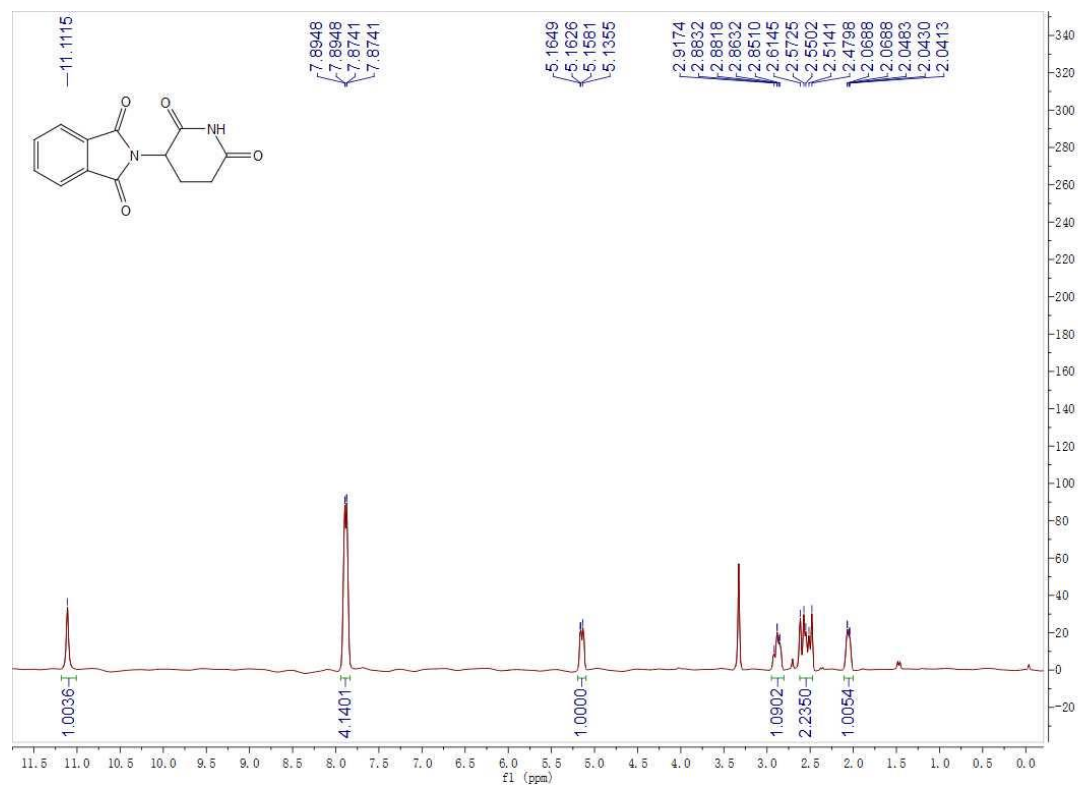

<sup>13</sup>C NMR spectrum (100 MHz, DMSO) of compound **Thalidomide**

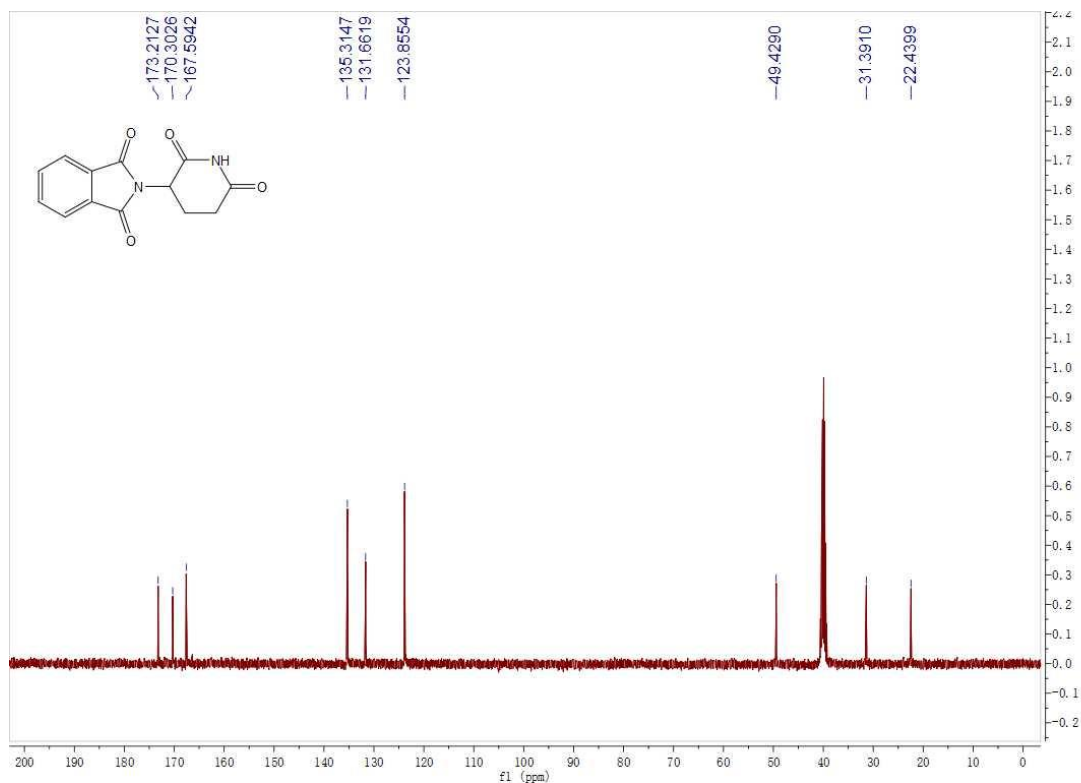

<sup>1</sup>H NMR spectrum (400 MHz, DMSO) of compound **Pomalyst**

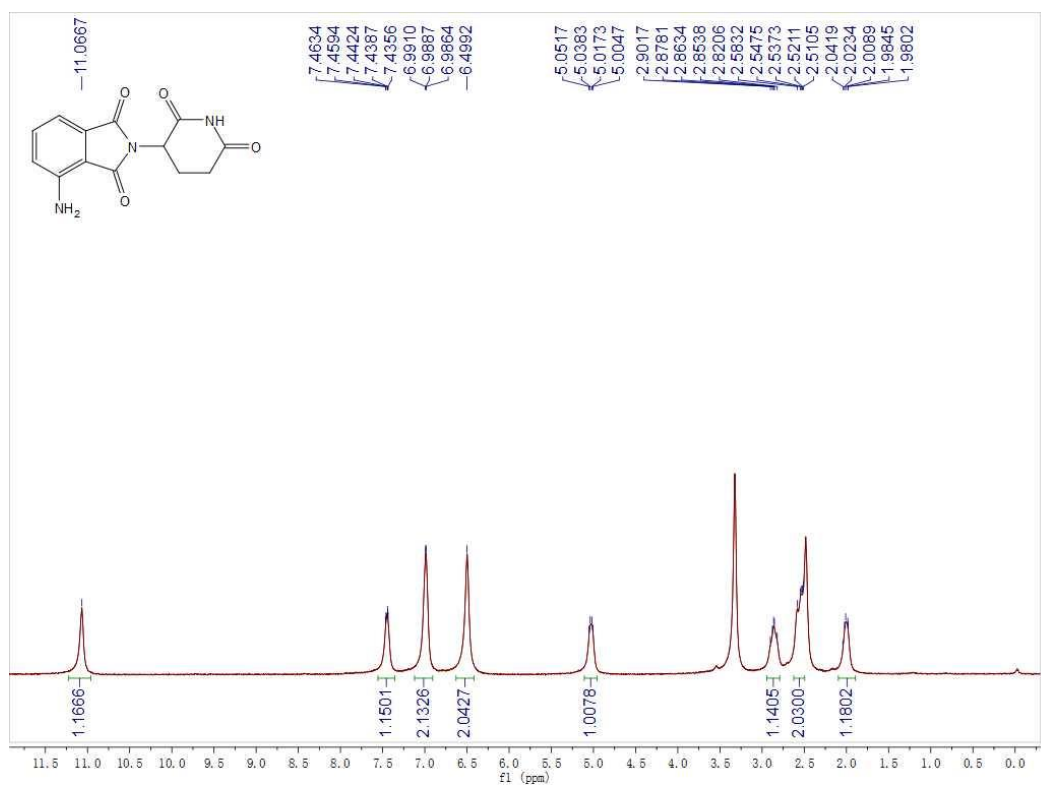

<sup>13</sup>C NMR spectrum (100 MHz, DMSO) of compound **Pomalyst**

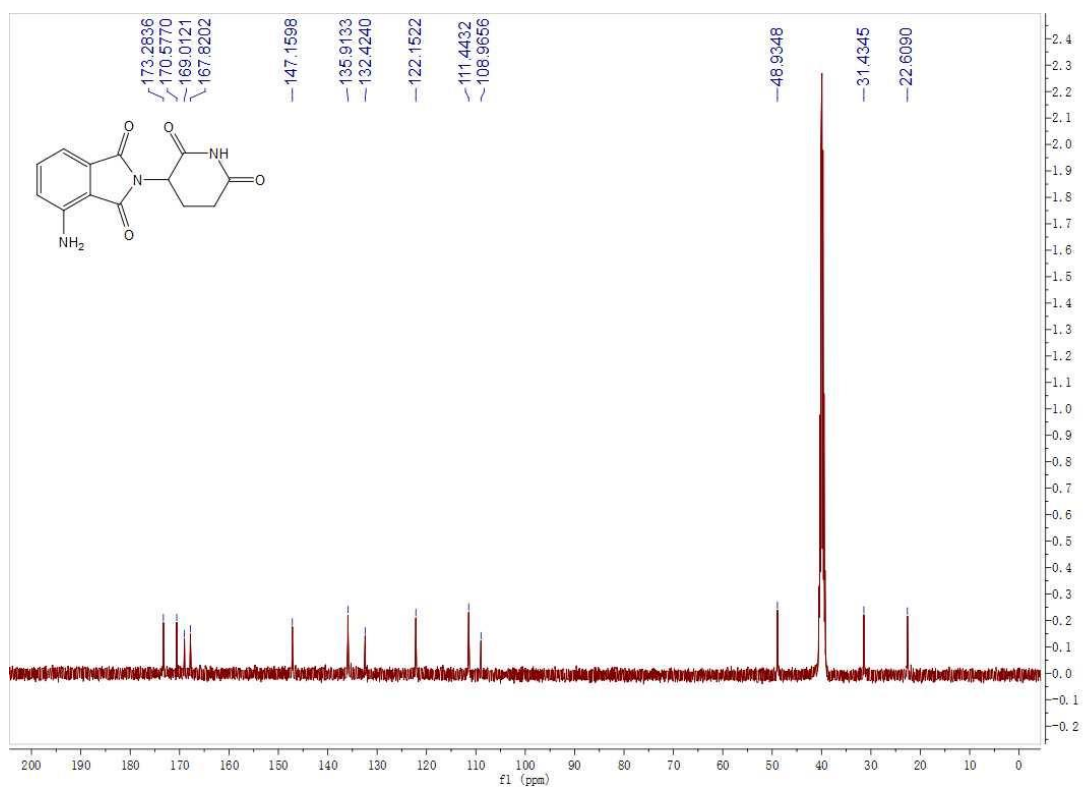

## 8.X-ray crystal structures for Product 3v

The crystal of **3v** was obtained by crystallization from a solution in DCM and Hexane after purification by column chromatography, the ellipsoid contour 50% probability.

### checkCIF/PLATON report

You have not supplied any structure factors. As a result the full set of tests cannot be run.

THIS REPORT IS FOR GUIDANCE ONLY. IF USED AS PART OF A REVIEW PROCEDURE FOR PUBLICATION, IT SHOULD NOT REPLACE THE EXPERTISE OF AN EXPERIENCED CRYSTALLOGRAPHIC REFEREE.

No syntax errors found. CIF dictionary Interpreting this report

### Datablock: aa

---

Bond precision: C-C = 0.0026 Å Wavelength=0.71073  
Cell: a=9.6676(10) b=7.8965(8) c=12.2576(10)  
alpha=90 beta=95.669(8) gamma=90  
Temperature: 293 K

|                        | Calculated   | Reported     |
|------------------------|--------------|--------------|
| Volume                 | 931.17(16)   | 931.17(15)   |
| Space group            | P 21/c       | P2(1)/c      |
| Hall group             | -P 2ybc      | ?            |
| Moiety formula         | C11 H10 O2   | ?            |
| Sum formula            | C11 H10 O2   | C11 H10 O2   |
| Mr                     | 174.19       | 174.19       |
| Dx, g cm <sup>-3</sup> | 1.242        | 1.243        |
| Z                      | 4            | 4            |
| Mu (mm <sup>-1</sup> ) | 0.085        | 0.085        |
| F000                   | 368.0        | 368.0        |
| F000'                  | 368.19       |              |
| h, k, lmax             | 12, 9, 15    | 12, 9, 15    |
| Nref                   | 1933         | 1929         |
| Tmin, Tmax             | 0.968, 0.981 | 0.842, 1.000 |
| Tmin'                  | 0.966        |              |

Correction method= # Reported T Limits: Tmin=0.842 Tmax=1.000  
AbsCorr = MULTI-SCAN

Data completeness= 0.998 Theta(max)= 26.500

R(reflections)= 0.0494( 1208) wR2(reflections)=  
0.1208( 1929)  
S = 1.057 Npar= 118

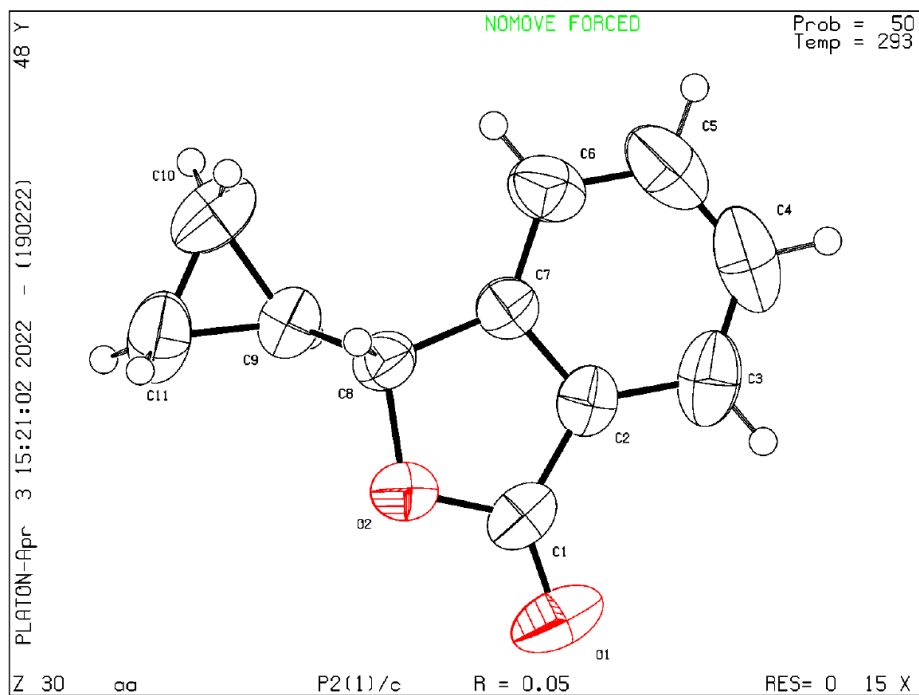

Supplement: d2cc04917a1.pdf [file d2cc04917a1.pdf]
